# Supplementary material for: MET receptor serves as a promising target in melanoma brain metastases
Source: Acta Neuropathol. 2024 Feb 22;147(1):44. doi: 10.1007/s00401-024-02694-1 (PMC10884227; doi:10.1007/s00401-024-02694-1)
Supplement: Supplementary file 1 — Supplementary file (XLSX 261 kb) [file 401_2024_2694_MOESM1_ESM.xlsx]

## Sheet: Summary
	Content
	Supplementary table 1: MBM investigated by IF/IHC. For general information about the MBM cohort, please see https://zenodo.org/record/7013097 (Supplementary table 1)
	Supplementary table 2a: β-values of identified DMRs/Genes of MBM specimen (n=21)
	Supplementary table 2b: Expression levels of clustered genes identified by methylome profiling ("core set")
	Supplementary table 4: Probe-specific information such as probeID, type and location of probe binding within the genome
	Supplementary table 5: GSVA gene signatures
	Supplementary table 6-1: Summarized scores as determined in the study
	Supplementary table 6-2: Determined, methylome profiling-based microglia scores ("MethylScore calculation")
	Supplementary table 6-3: Transcriptome profiling-based microglia score "(RNAScore")
	Supplementary table 6-4: Transcriptome profiling-based Proliferation index
	Supplementary table 7: Sequences of primers used in the study

## Sheet: Supplementary table 1
Supplementary table 1: MBM investigated by IF/IHC. For general information about the MBM cohort, please see https://zenodo.org/record/7013097 (Supplementary table 1)
									Investigated by IF/ IHC
Patient ID	Gender	Confirmed MM	Category	RNAseq (NovaSeq6000)	850k (EPIC) methylome	CHPv2 panel (IonProton)	BRAF-status	NRAS-status	CD3	Iba1	MET	pMET1234/1235	pS6235/236	ITGB7	PD-L1
1	f	yes	MBM, tumor	x	x	x	wt	p.G13R, 48 %	yes	yes		yes			yes
2	f	yes	MBM, tumor	x	x	x	p.V600E, 50 %	wt		yes
3	f	yes	MBM, tumor	x	x	x	p.V600K, 51 %	wt		yes
4	f	yes	MBM, tumor	x	x	x	wt	p.Q61L, 40 %	yes	yes				yes
6	m	yes	MBM, tumor	x	x	x	wt	p.Q61R, 63 %						yes
14	m	yes	MBM, tumor	-	-	x	wt	wt		yes	yes	yes	yes
15	f	yes	MBM, tumor	-	-	x	wt	p.Q61R, 28 %	yes	yes				yes
16	f	yes	MBM, tumor	-	-	-	p.V600E*	ND						yes
28	m	yes	MBM, tumor	-	-	-	p.V600E*	ND			yes	yes
29	f	yes	MBM, tumor	-	-	-	p.V600R*	ND			yes	yes
31	f	yes	MBM, tumor	-	-	-	p.V600E*	ND			yes	yes	yes
36	m	yes	MBM, tumor	-	-	-	wt	ND		yes	yes	yes
90	m	yes	MBM, tumor	-	-	-	wt	p.Q61L		yes		yes
91	f	yes	MBM, tumor	-	-	-	p.V600E	wt		yes		yes

## Sheet: Supplementary table 2a
	Supplementary table 2a: β-values of identified DMRs/Genes of MBM specimen (n=21)
cgid	pval	Genes		ID	Pat 22	Pat 23-O	Pat 23-P	Pat 24-F	Pat 24-I	Pat 25	Pat 26	Pat 27	Pat 8/M3	Pat 1	Pat 2	Pat 3	Pat 4	Pat 5	Pat 6	Pat 7	Pat 9	Pat 10	Pat 11	Pat 12	Pat 13
cg04378886	4.59459e-05	RCN3		cg04378886	0.483936	0.219174	0.526614	0.419175	0.0928342	0.0725566	0.163487	0.163803	0.222338	0.793211	0.722923	0.194411	0.147908	0.1493	0.257799	0.505828	0.452295	0.611982	0.19823	0.625224	0.215706
cg24400465	0.0010155	APBB1IP		cg24400465	0.292446	0.292135	0.335019	0.426357	0.227381	0.339367	0.31716	0.363239	0.34201	0.576364	0.628647	0.300873	0.308782	0.162147	0.27306	0.209882	0.251578	0.517618	0.215859	0.350276	0.610977
cg21335375	0.00195839	CCL3		cg21335375	0.536516	0.755098	0.412059	0.222772	0.421662	0.363962	0.377768	0.366177	0.351499	0.582251	0.530862	0.220523	0.189535	0.333745	0.224935	0.386107	0.382772	0.43124	0.241161	0.287082	0.516122
cg11299543	0.00392846	PDCD1LG2		cg11299543	0.132314	0.203652	0.224525	0.187886	0.233655	0.316973	0.256375	0.297927	0.422667	0.556143	0.599391	0.30117	0.212572	0.096574	0.1067	0.135358	0.0990237	0.470064	0.137397	0.213956	0.337593
cg10725892	0.00456375	WIPF1		cg10725892	0.309817	0.30855	0.347589	0.487273	0.361868	0.278788	0.526316	0.376271	0.416046	0.707212	0.63591	0.331364	0.172672	0.307344	0.152516	0.74855	0.110508	0.425293	0.2606	0.214053	0.280431
cg06502892	0.00530682	SLC26A5		cg06502892	0.45198	0.400258	0.448479	0.381236	0.429933	0.574065	0.256372	0.380815	0.26207	0.571278	0.488988	0.132387	0.148337	0.199678	0.119215	0.681836	0.374265	0.404781	0.511576	0.177303	0.60572
cg26689077	0.00607451	ITGB7		cg26689077	0.447408	0.462639	0.445141	0.280387	0.36943	0.490879	0.514687	0.330539	0.377648	0.665279	0.646798	0.422944	0.22599	0.282137	0.244498	0.510139	0.451533	0.465593	0.406248	0.226727	0.348822
cg27429749	0.00857315	UBE2L6		cg27429749	0.181491	0.408197	0.237217	0.259825	0.339383	0.314629	0.217436	0.387218	0.377406	0.595894	0.514578	0.299634	0.185829	0.152201	0.156853	0.269488	0.151832	0.262615	0.221128	0.204651	0.236808
cg21704050	0.0100301	P2RY12		cg21704050	0.168534	0.291667	0.336111	0.378215	0.243243	0.418655	0.327092	0.471136	0.312322	0.564846	0.510258	0.36284	0.192914	0.159926	0.210484	0.369186	0.246497	0.408741	0.277126	0.407035	0.299737
cg24704344	0.0118823	PDE9A		cg24704344	0.30403	0.435	0.520027	0.381569	0.208707	0.393688	0.47693	0.430881	0.317805	0.642597	0.679665	0.179974	0.197032	0.432512	0.168495	0.179235	0.520833	0.367617	0.452321	0.247634	0.662832
cg11526752	0.0219823	WIPF1		cg11526752	0.236927	0.419958	0.520535	0.472036	0.335357	0.356815	0.553282	0.37034	0.446078	0.725418	0.71192	0.514765	0.218735	0.347268	0.172895	0.767786	0.134531	0.557319	0.44772	0.230769	0.313605
cg07796897	0.0242474	IL15RA		cg07796897	0.558462	0.47776	0.189971	0.299274	0.287613	0.428008	0.570495	0.570826	0.290932	0.778905	0.664711	0.549835	0.158913	0.0847234	0.249043	0.757631	0.523572	0.533696	0.564889	0.146333	0.33523
cg22152328	0.0249838	MX1		cg22152328	0.740704	0.0801496	0.084815	0.761962	0.0662408	0.0844037	0.0821162	0.090817	0.3697	0.551797	0.491897	0.417782	0.0754469	0.0708029	0.211918	0.498516	0.669534	0.140452	0.106979	0.0938172	0.0884472
cg20770857	0.0346109	TNK2		cg20770857	0.19834	0.476804	0.396048	0.36377	0.359932	0.256623	0.232986	0.311111	0.300741	0.767184	0.667339	0.539575	0.138999	0.372287	0.164524	0.766029	0.516324	0.330795	0.242225	0.205282	0.241985
cg16817229	0.0356816	MX1		cg16817229	0.720613	0.0765136	0.0650888	0.39768	0.155291	0.10574	0.0454414	0.0535506	0.362019	0.685315	0.468663	0.388182	0.0545852	0.0424554	0.115304	0.531752	0.655504	0.0859014	0.0680072	0.0567926	0.0491531
cg15251679	0.0404193	UBE2L6		cg15251679	0.240378	0.29128	0.206116	0.274262	0.338057	0.322449	0.323928	0.426207	0.400646	0.641051	0.590452	0.559834	0.21817	0.166946	0.227116	0.212245	0.180664	0.341019	0.294795	0.287757	0.324945
cg21941030	0.0438005	RCN3		cg21941030	0.315017	0.697568	0.61183	0.166348	0.430206	0.248295	0.17155	0.162128	0.16973	0.680863	0.760699	0.106963	0.138184	0.105849	0.135531	0.615765	0.497436	0.697615	0.145889	0.347725	0.146522
cg00271126	0.0267661	KCTD1		cg00271126	0.215695	0.15215	0.17278	0.521978	0.454657	0.279661	0.670928	0.593159	0.364594	0.107547	0.18437	0.242855	0.689126	0.722675	0.639007	0.563989	0.589448	0.482923	0.289303	0.658438	0.700602
cg00342530	0.0270107	GARNL3		cg00342530	0.296033	0.10931	0.218188	0.426382	0.324081	0.228022	0.280382	0.490769	0.481737	0.217162	0.141394	0.246212	0.539154	0.597367	0.639225	0.469362	0.42599	0.35002	0.272931	0.528628	0.713865
cg01195241	0.0261063	IP6K3		cg01195241	0.500561	0.395086	0.423917	0.181804	0.310533	0.369133	0.273241	0.715559	0.551032	0.164728	0.216395	0.349921	0.514864	0.288954	0.627478	0.407502	0.629221	0.383901	0.336933	0.503136	0.717887
cg01688202	0.000985561	SPATA2		cg01688202	0.508198	0.190344	0.313107	0.277453	0.554911	0.128319	0.684955	0.577599	0.511297	0.157895	0.181508	0.556831	0.731285	0.767654	0.65671	0.760801	0.48645	0.565969	0.493888	0.73592	0.141952
cg02226192	0.0173117	ANKRD11		cg02226192	0.327071	0.0878589	0.133616	0.336818	0.346336	0.531465	0.246402	0.675339	0.407144	0.181799	0.134228	0.328215	0.549122	0.391347	0.713838	0.496271	0.482904	0.565103	0.465623	0.754636	0.43426
cg02485605	0.00390499	ZMIZ1		cg02485605	0.480088	0.712846	0.822306	0.617169	0.82985	0.223964	0.70223	0.280029	0.710605	0.146372	0.262516	0.686134	0.768744	0.867166	0.604839	0.843423	0.819269	0.766505	0.579594	0.639071	0.851882
cg02866152	0.00408181	MYT1		cg02866152	0.589973	0.767396	0.635226	0.562636	0.444659	0.43199	0.609161	0.416233	0.414112	0.183494	0.214087	0.385132	0.524787	0.593942	0.576759	0.589137	0.431489	0.420347	0.336652	0.770984	0.48085
cg03621633	0.00238683	MYO18A		cg03621633	0.3182	0.539806	0.509886	0.621762	0.600246	0.481645	0.65445	0.589897	0.583842	0.221572	0.262417	0.467886	0.755063	0.607627	0.731657	0.39635	0.627402	0.590177	0.600469	0.747786	0.672513
cg04403415	0.0314191	NCOR2		cg04403415	0.219253	0.189172	0.149733	0.300079	0.331301	0.294471	0.664945	0.661	0.320432	0.0866911	0.0939284	0.190464	0.560274	0.702579	0.66471	0.705379	0.450151	0.537825	0.219686	0.621873	0.221656
cg04411446	0.000263908	NAA60		cg04411446	0.276895	0.42348	0.622749	0.316143	0.399533	0.314115	0.578571	0.597671	0.459028	0.25431	0.22021	0.529902	0.646025	0.644916	0.674893	0.779831	0.786042	0.517068	0.328678	0.683097	0.642056
cg04426553	0.0224816	HNRNPR		cg04426553	0.394788	0.566717	0.61976	0.545249	0.440574	0.387346	0.524312	0.477025	0.598737	0.24879	0.235004	0.52831	0.591025	0.301626	0.625348	0.713141	0.680098	0.490793	0.517165	0.612843	0.759699
cg06119871	0.0113032	NCK1		cg06119871	0.386591	0.346883	0.351613	0.394892	0.336252	0.333333	0.414514	0.400998	0.442356	0.188767	0.273158	0.478619	0.822917	0.441851	0.756219	0.488704	0.74131	0.466174	0.314052	0.675168	0.781532
cg06242243	0.00419541	NCOR2		cg06242243	0.667397	0.256825	0.292151	0.542218	0.437367	0.549488	0.709376	0.647166	0.580298	0.185677	0.212953	0.410199	0.666887	0.803826	0.836897	0.78267	0.736842	0.664642	0.319276	0.763803	0.524252
cg06674553	0.0112207	JAK1		cg06674553	0.362164	0.444023	0.628249	0.376448	0.432188	0.420561	0.293864	0.402685	0.581884	0.161442	0.250807	0.446802	0.818343	0.615118	0.593056	0.287262	0.541559	0.559047	0.344783	0.743464	0.811179
cg06759890	0.0461359	LHFPL2		cg06759890	0.613561	0.850458	0.757225	0.619125	0.799092	0.426	0.745055	0.777845	0.402273	0.250897	0.165016	0.324815	0.671962	0.334718	0.79344	0.558292	0.591084	0.673611	0.42408	0.758506	0.560416
cg06787789	0.0136506	CORO2B		cg06787789	0.291735	0.679667	0.616945	0.291317	0.757935	0.244202	0.693	0.769182	0.530809	0.18551	0.193956	0.342298	0.692588	0.58836	0.783878	0.461194	0.559924	0.490207	0.310526	0.483866	0.525503
cg08850922	0.0378635	ADD1		cg08850922	0.235506	0.125527	0.159083	0.79591	0.401447	0.18537	0.663138	0.542079	0.414457	0.156452	0.104676	0.207067	0.548794	0.740085	0.7171	0.767018	0.633883	0.46133	0.343524	0.564441	0.338265
cg09026787	0.0127605	IP6K3		cg09026787	0.558287	0.711033	0.50313	0.434572	0.370136	0.27605	0.307938	0.655019	0.549157	0.131689	0.221563	0.382717	0.521812	0.325817	0.611745	0.417332	0.618593	0.456885	0.40427	0.619072	0.7331
cg10087172	0.0206496	ARHGDIB		cg10087172	0.146985	0.738785	0.579075	0.573907	0.205866	0.438497	0.510855	0.782743	0.205267	0.169525	0.0966833	0.204786	0.586107	0.496658	0.645944	0.767843	0.615428	0.35523	0.115869	0.146995	0.602233
cg11910652	0.0139383	TJAP1		cg11910652	0.783062	0.1576	0.303218	0.695617	0.806146	0.375313	0.737925	0.357143	0.540859	0.244055	0.242587	0.449787	0.521704	0.752294	0.744059	0.352414	0.589738	0.708754	0.549614	0.772782	0.587921
cg12063688	0.00531244	PLEKHG3		cg12063688	0.605455	0.82345	0.808827	0.59589	0.504587	0.283154	0.548136	0.85287	0.562385	0.181961	0.244349	0.641335	0.54206	0.457795	0.81112	0.72721	0.727319	0.599815	0.365426	0.791556	0.789076
cg12320351	0.012082	HIVEP2		cg12320351	0.269506	0.29902	0.256074	0.441113	0.268982	0.308806	0.503085	0.705263	0.37265	0.193282	0.272807	0.362233	0.604879	0.712238	0.675999	0.61558	0.675205	0.48392	0.393967	0.627871	0.599885
cg12473406	0.0324618	GREB1L		cg12473406	0.847406	0.048295	0.0772391	0.689422	0.671451	0.918836	0.825616	0.0970255	0.0873857	0.061501	0.10938	0.197722	0.778836	0.424604	0.783968	0.901348	0.766602	0.451917	0.168317	0.162354	0.0849673
cg12798245	0.00346674	RAPGEF3		cg12798245	0.396502	0.609988	0.431627	0.428424	0.526149	0.477848	0.80188	0.708509	0.327729	0.136107	0.219079	0.512191	0.623833	0.603498	0.811122	0.154413	0.419907	0.571178	0.605778	0.617153	0.607253
cg13297609	0.0165175	PKNOX2		cg13297609	0.34052	0.274725	0.632162	0.762853	0.8	0.358789	0.873082	0.886963	0.648237	0.146872	0.272552	0.404432	0.664112	0.604792	0.756241	0.697221	0.507226	0.77526	0.396853	0.822899	0.792185
cg14034197	0.0169255	GREB1L		cg14034197	0.780532	0.118305	0.135534	0.356272	0.36964	0.895284	0.845268	0.793475	0.249924	0.102531	0.205907	0.339286	0.639039	0.409214	0.71811	0.77487	0.602672	0.379204	0.22377	0.230472	0.156548
cg14035238	0.0257984	WIPF1		cg14035238	0.188981	0.345783	0.615658	0.235766	0.46872	0.158612	0.28597	0.345992	0.235909	0.0854369	0.137299	0.486947	0.637051	0.1878	0.635313	0.65443	0.105303	0.309728	0.208284	0.260377	0.635128
cg14536425	0.00415395	LHFPL2		cg14536425	0.354356	0.315436	0.321429	0.441478	0.45	0.351544	0.429812	0.44058	0.484032	0.21542	0.203117	0.453573	0.636033	0.392063	0.652917	0.343877	0.542404	0.584146	0.49442	0.690578	0.818234
cg14796658	0.00581434	MICAL3		cg14796658	0.687025	0.506679	0.558637	0.260209	0.553299	0.36403	0.563078	0.349261	0.659118	0.232712	0.226948	0.444029	0.708399	0.707846	0.810243	0.796828	0.723611	0.524165	0.513062	0.832539	0.741094
cg15633745	0.00187424	OSCAR		cg15633745	0.377892	0.178008	0.30284	0.528111	0.581977	0.37318	0.568405	0.404762	0.470385	0.191015	0.241326	0.687872	0.635155	0.510454	0.819514	0.586126	0.577625	0.76967	0.849244	0.7969	0.66951
cg16105461	0.0394375	DAGLA		cg16105461	0.42543	0.217778	0.321697	0.349942	0.515604	0.229339	0.587945	0.83096	0.541941	0.0999659	0.199361	0.235495	0.51945	0.609809	0.679357	0.811548	0.4913	0.468121	0.302703	0.347156	0.373682
cg16311756	2.68361e-05	CYFIP1		cg16311756	0.55255	0.268251	0.577731	0.404412	0.389397	0.458647	0.547458	0.635865	0.692871	0.212055	0.190781	0.661433	0.764796	0.791998	0.818248	0.783992	0.684162	0.45952	0.758976	0.827317	0.745548
cg16402252	0.00721033	PSMG2		cg16402252	0.199653	0.603347	0.694472	0.343727	0.507522	0.322388	0.231653	0.291098	0.230356	0.0938057	0.106992	0.417189	0.635622	0.318238	0.671861	0.217015	0.417167	0.402712	0.269022	0.370429	0.519135
cg17004353	0.00356278	CARS		cg17004353	0.621379	0.391121	0.442438	0.355862	0.361589	0.343103	0.51834	0.461117	0.270347	0.110248	0.160051	0.425405	0.632756	0.602367	0.566488	0.70325	0.524505	0.468047	0.498282	0.318244	0.52973
cg17054650	0.0188912	KSR1		cg17054650	0.343476	0.0652784	0.0694224	0.412085	0.664014	0.200629	0.330045	0.812065	0.267767	0.126547	0.0950579	0.293648	0.510685	0.751839	0.713331	0.678452	0.617801	0.610503	0.310507	0.473867	0.431974
cg17501754	0.00122288	LSP1		cg17501754	0.601352	0.24744	0.249768	0.241685	0.733843	0.435185	0.186632	0.702988	0.601117	0.220846	0.238058	0.623552	0.656079	0.532409	0.608837	0.53081	0.687211	0.728465	0.639734	0.651513	0.636027
cg18170989	0.0156515	CAB39L		cg18170989	0.443995	0.299776	0.310606	0.280464	0.404943	0.291747	0.564215	0.493878	0.316723	0.0817909	0.171205	0.258514	0.598951	0.415199	0.635816	0.289723	0.555063	0.231902	0.606439	0.717682	0.483982
cg18566555	0.0303708	TRIM2		cg18566555	0.347906	0.318761	0.257471	0.460645	0.422581	0.354949	0.736637	0.52766	0.433287	0.21321	0.242128	0.294285	0.525298	0.357839	0.670697	0.193388	0.466953	0.504505	0.400673	0.575106	0.412659
cg19027056	0.00835103	PKNOX2		cg19027056	0.358211	0.452141	0.667218	0.517495	0.871294	0.180676	0.887772	0.851928	0.612283	0.1449	0.262704	0.423146	0.80568	0.720631	0.816707	0.780669	0.562956	0.81435	0.416459	0.857298	0.820668
cg19483663	0.00650791	XRCC4		cg19483663	0.453059	0.34669	0.315248	0.43838	0.615018	0.309524	0.689201	0.581481	0.584746	0.186999	0.186983	0.480504	0.583185	0.39585	0.761834	0.738205	0.544727	0.601302	0.492153	0.727438	0.637774
cg19826026	0.0144062	ARHGDIB		cg19826026	0.18975	0.628981	0.613503	0.4791	0.300613	0.409479	0.583818	0.640148	0.379342	0.26919	0.182076	0.36456	0.588149	0.714881	0.688499	0.65813	0.664561	0.489487	0.387839	0.63802	0.712091
cg20991612	4.24975e-05	FAM183A		cg20991612	0.469645	0.0887386	0.101028	0.481335	0.117763	0.461315	0.109126	0.57936	0.109769	0.0665837	0.0950903	0.430198	0.530328	0.489707	0.601685	0.110772	0.532519	0.125384	0.155597	0.51133	0.122618
cg21411366	0.012762	SOD3		cg21411366	0.48243	0.0733423	0.335904	0.381115	0.821623	0.62803	0.519705	0.867126	0.598825	0.117765	0.244766	0.409249	0.799687	0.530061	0.843085	0.865102	0.895537	0.476214	0.533933	0.655534	0.55232
cg21525176	0.00542003	LHFPL2		cg21525176	0.468206	0.561939	0.706346	0.603087	0.681265	0.333019	0.723934	0.380165	0.6113	0.201634	0.259335	0.604696	0.570405	0.525464	0.63783	0.286638	0.44362	0.755537	0.540577	0.694737	0.787129
cg22878091	0.00137173	PKNOX2		cg22878091	0.326846	0.368836	0.535052	0.510595	0.496045	0.257519	0.72545	0.673303	0.477076	0.267442	0.2208	0.664526	0.663631	0.650232	0.614165	0.773798	0.587023	0.676755	0.432158	0.628763	0.694141
cg23205648	0.0292137	LCP1		cg23205648	0.220557	0.431083	0.248394	0.429636	0.722248	0.226016	0.276671	0.329532	0.204125	0.0858561	0.146786	0.42269	0.627322	0.1875	0.596833	0.300304	0.136188	0.466054	0.154997	0.26428	0.677316
cg24104654	0.016033	TBC1D24		cg24104654	0.361781	0.699474	0.545904	0.371343	0.129933	0.362667	0.38728	0.500577	0.262228	0.138285	0.232654	0.48991	0.65878	0.342247	0.601641	0.329842	0.389306	0.65025	0.409655	0.585108	0.684017
cg25422938	0.0195236	RPA3		cg25422938	0.379599	0.360714	0.302326	0.481752	0.448227	0.656518	0.759117	0.690351	0.667825	0.118044	0.185471	0.292765	0.802372	0.816417	0.855806	0.697959	0.897199	0.759134	0.653434	0.870072	0.850675
cg25650484	0.0270851	PAK4		cg25650484	0.375204	0.777656	0.723524	0.594612	0.5	0.316667	0.43091	0.713177	0.250788	0.127115	0.207662	0.379196	0.785706	0.358281	0.799398	0.200213	0.489993	0.667371	0.345272	0.837466	0.50406
cg26046074	0.0184137	ANKRD11		cg26046074	0.572113	0.579035	0.437798	0.599928	0.59927	0.523299	0.728762	0.56119	0.670391	0.216989	0.13801	0.327533	0.532535	0.609131	0.809662	0.693532	0.666185	0.659104	0.551057	0.8	0.806068
cg26536070	0.0100285	THRA		cg26536070	0.390426	0.61875	0.471809	0.562672	0.725389	0.519031	0.343253	0.400255	0.55502	0.271624	0.203065	0.382509	0.58591	0.472663	0.677994	0.75371	0.737423	0.565126	0.382725	0.608944	0.532643
cg27160485	0.0328924	GPR21		cg27160485	0.562712	0.511173	0.637627	0.566053	0.589635	0.412587	0.263838	0.445522	0.249533	0.218872	0.191714	0.331968	0.754664	0.38885	0.650314	0.174624	0.475623	0.407183	0.388779	0.56474	0.712264
cg27340001	0.00884897	TP53BP1		cg27340001	0.610782	0.40553	0.31459	0.371348	0.519881	0.176836	0.31753	0.633697	0.508715	0.141006	0.148091	0.368222	0.579151	0.471201	0.778892	0.441487	0.604601	0.438308	0.283772	0.528007	0.43999
cg27520108	0.00326896	CORO2B		cg27520108	0.363735	0.255221	0.324468	0.700233	0.785235	0.2	0.666146	0.778598	0.539263	0.203493	0.251258	0.482129	0.689755	0.580273	0.790259	0.716315	0.677722	0.474474	0.666835	0.586236	0.554005

## Sheet: Supplementary table 2b
	Supplementary table 2b: Expression levels of clustered genes identified by methylome profiling ("core set")
Iba1 level	low	low	low	high	high	high	low	low	high	low	high	high	high	high	high	high	low	low	low	low	low
Genes	Cereb.	Cortex	Pat_1	Pat_10	Pat_11	Pat_12	Pat_2	Pat_22	Pat_23.O	Pat_23.P	Pat_3	Pat_4	Pat_5	Pat_6	Pat_7	Pat_9	Pat8_BMC1.M1	Pat8_BMC1.M4	Pat8_M1	Pat8_M4	Pons
SPATA2	2.993	2.643	2.195	1.195	1.797	1.241	2.485	2.612	2.056	2.176	0.742	1.539	1.769	1.131	0.596	1.543	2.01	4.376	2.41	4.13	3.275
CCL3	0	-3.107	2.083	4.189	1.791	3.603	-0.07	1.114	2.001	-0.542	3.909	4.576	1.68	3.508	2.076	2.493	0.818	-2.508	0.216	1.961	-0.753
TNK2	4.096	3.577	2.229	2.066	0.431	0.373	1.383	2.855	1.348	2.831	1.104	2.121	1.655	1.205	2.209	2.376	2.991	2.55	2.184	2.82	3.809
ANKRD11	3.887	3.192	2.852	2.062	1.746	1.826	3.01	4.38	3.591	4.243	2.18	1.94	2.111	1.931	2.245	3.265	2.9	3.123	2.313	3.323	3.323
AIF1	0.651	2.758	2.257	5.488	4.124	6.192	1.523	3.525	4.562	1.955	5.245	6.549	4.247	6.008	4.136	4.755	0.207	-6.368	2.146	3.303	3.627
PDCD1LG2	-0.872	0.723	-1.307	2.813	0.792	3.252	-2.418	0.431	0.422	-1.459	2.617	3.778	2.013	3.594	-0.341	-0.05	-0.008	-6.258	-0.404	0.057	1.037
NAA60	3.521	2.412	2.792	1.502	1.034	2.314	3.026	3.223	3.293	3.539	2.442	2.219	2.37	2.207	2.314	1.136	3.468	2.453	2.847	2.704	3.073
ITGB7	0.206	-0.963	-1.443	1.67	1.737	2.381	-1.937	2.184	-1.048	-0.689	2.263	2.308	2.525	2.24	-0.956	0.485	-1.096	-2.398	-1.042	0.115	0.736
OSCAR	-2.689	0.32	-1.982	2.205	-0.564	1.513	-3.235	-0.893	-0.653	-1.119	0.888	2.543	1.024	1.731	-0.518	-0.722	0.527	-3.616	-2.523	0.25	0.648
TBC1D24	3.452	2.65	2.411	1.054	0.431	1.856	2.282	2.159	1.066	1.557	1.612	1.397	1.61	1.454	1.547	0.466	2.373	0.925	1.463	1.179	2.343
CORO2B	5.162	4.626	5.032	4.207	3.413	1.807	5.719	5.356	3.675	4.103	4.509	1.64	2.056	0.97	3.61	2.542	2.481	2.908	3.868	3.61	4.956
KSR1	2.372	1.936	0.68	-0.366	-1.462	-0.482	0.244	0.79	0.083	0.902	-0.225	-0.02	-0.417	-1.057	-0.768	0.517	-0.401	-0.483	-0.787	0.419	2.542
IL15RA	-0.604	-0.661	-2.615	0.702	-0.9	0.981	-1.597	0.592	-0.456	-1.713	1.184	2.557	0.696	1.385	-0.936	-0.417	0.738	-3.63	-1.706	-1.365	0.417
P2RY12	1.826	3.14	-1.425	1.1	1.786	4.346	1.156	-1.284	1.77	-2.905	0.368	5.212	1.432	3.197	1.525	-0.17	-3.451	-4.103	-0.522	-0.126	3.445
DAGLA	3.296	2.455	3.03	0.619	-0.521	-2.187	3.706	1.727	3.7	3.453	3.927	1.475	1.313	-1.146	-2.185	2.543	3.975	1.784	3.667	2.339	1.592
LCP1	1.833	2.301	2.151	5.684	3.49	6.151	2.1	3.724	3.926	3.372	5.881	6.672	5.25	6.219	3.521	4.226	1.664	2.37	2.497	4.707	3
APBB1IP	0.142	1.109	-1.109	3.025	0.793	3.97	-0.954	1.199	1.86	0.573	1.719	4.165	1.942	2.663	1.525	1.399	-3.965	-8.009	0.171	1.26	1.96
PAK4	2.018	1.008	2.84	1.622	2.114	2.132	2.976	3.359	2.676	3.169	1.943	1.372	2.8	2.398	2.813	1.658	5.224	5.218	4.569	5.025	1.182
RCN3	0.815	1.093	-0.631	3.431	0.773	2.197	1.273	2.376	1.973	1.679	4.989	5.081	7.032	2.251	1.589	4.454	1.968	3.199	0.445	3.215	1.383
SOD3	0.936	0.922	5.624	3.218	2.826	-1.222	2.403	2.018	3.416	4.618	3.884	1.091	0.56	-0.483	-1.901	1.805	4.398	3.477	3.724	3.69	2.371
KCTD1	1.288	1.88	2.162	0.12	0.69	0.869	1.751	2.426	2.195	2.272	2.432	0.579	0.482	0.935	1.565	0.606	1.876	1.005	1.586	1.378	0.672
RPA3	0.831	2.12	1.823	2.997	4.132	3.06	3.084	1.227	2.986	1.956	2.585	3.568	2.841	3.504	2.362	3.087	2.426	2.896	2.467	2.041	1.586
GREB1L	0.408	1.268	0.879	-2.359	-3.032	-3.136	-2.578	-1.193	-1.69	-0.039	-1.832	-2.753	-5.767	-3.993	-2.925	-2.01	-1.829	-2.341	-1.719	-1.812	1.48
MX1	1.429	3.657	1.086	5.726	3.481	1.471	2.301	2.942	0.139	-0.266	3.728	4.602	5.477	5.337	0.83	3.339	-0.294	-2.228	0.831	0.128	4.178
UBE2L6	3.428	3.981	3.903	5.646	5.448	6.233	2.806	5.426	4.552	4.978	5.063	6.105	6.022	6.011	4.572	3.037	4.086	2.328	4.326	2.792	4.072
NCOR2	4.728	3.027	3.246	2.688	2.726	2.261	3.129	5.249	4.041	4.875	2.243	3.019	2.609	2.171	3.481	3.202	2.563	5.07	2.769	5.51	3.774
ZMIZ1	4.418	3.436	3.189	2.695	1.571	1.697	3.543	4.446	3.851	4.506	2.226	2.241	2.359	1.911	2.975	2.736	1.044	3.416	1.732	3.815	4.203
FAM183A	0	0	-3.677	0	0	0	0	-5.231	-3.972	-4.671	1.161	0	-3.119	0	0	-3.116	-4.895	-4.769	-5.025	-1.914	-3.176
MICAL3	4.816	3.186	3.468	0.341	2.721	2.69	3.509	3.762	3.285	3.683	3.425	2.003	3.389	2.731	3.091	3.988	3.202	3.428	3.182	3.842	3.384
HCK	0.442	1.236	0.608	3.655	2.429	3.884	0.772	2.082	2.552	0.785	3.779	5.306	3.514	4.375	2.734	2.59	-0.887	-7.644	0.73	2.38	2.079
SYK	0.093	1.091	0.825	4.052	1.452	3.813	3.23	2.388	1.847	0.415	3.905	4.862	2.987	3.945	2.532	1.233	-0.879	2.018	0.749	2.021	2.02

## Sheet: Supplementary table 4
	Supplementary table 4: Probe-specific information such as probeID, type and location of probe binding within the genome
		CpG_chrm	probe_strand	probeID	CpG_beg	CpG_end	CGIposition	genesUniq
		chr10	+	cg02485605	79188544	79188546	NA	ZMIZ1
		chr16	+	cg02226192	89395325	89395327	NA	ANKRD11
		chr12	-	cg04403415	124506540	124506542	NA	NCOR2
		chr22	-	cg14796658	17947198	17947200	NA	MICAL3
		chr16	+	cg04411446	3464526	3464528	NA	AC004224.2;AC025283.2;NAA60
		chr15	-	cg06787789	68631650	68631652	NA	CORO2B
		chr3	-	cg20770857	195906941	195906943	N_Shore	TNK2;TNK2-AS1
		chr20	+	cg01688202	49910176	49910178	S_Shelf	SPATA2
		chr16	+	cg24104654	2487991	2487993	NA	TBC1D24
		chr18	+	cg00271126	26511482	26511484	NA	KCTD1
		chr19	-	cg25650484	39145862	39145864	NA	PAK4
		chr4	-	cg21411366	24795553	24795555	N_Shelf	SOD3
		chr11	-	cg16105461	61718380	61718382	N_Shelf	DAGLA
		chr11	-	cg27429749	57566138	57566140	N_Shore	UBE2L6
		chr11	-	cg15251679	57566465	57566467	N_Shore	UBE2L6
		chr13	-	cg23205648	46168555	46168557	NA	LCP1
		chr6	-	cg18113826	31616164	31616166	N_Shelf	AIF1
		chr7	+	cg25422938	7695588	7695590	NA	AC007161.3;RPA3;UMAD1
		chr19	-	cg04378886	49528137	49528139	S_Shore	RCN3
		chr19	+	cg21941030	49527759	49527761	Island	RCN3
		chr9	-	cg05128364	90827557	90827559	NA	SYK
		chr21	-	cg22152328	41426458	41426460	Island	MX1
		chr21	+	cg16817229	41426271	41426273	Island	MX1
		chr20	-	cg03498995	32069095	32069097	NA	HCK
		chr10	+	cg24400465	26475045	26475047	NA	APBB1IP
		chr3	+	cg21704050	151346025	151346027	NA	MED12L;P2RY12
		chr17	-	cg21335375	36090087	36090089	NA	AC243829.4;CCL3
		chr9	+	cg11299543	5510594	5510596	NA	AL162253.2;PDCD1LG2
		chr12	+	cg11510999	53197705	53197707	Island	ITGB7^
		chr12	-	cg18320160	53197822	53197824	Island	ITGB7^
		chr12	+	cg26689077	53206021	53206023	NA	ITGB7*
		chr12	+	cg01033299	53207230	53207232	NA	ITGB7*
		chr19	-	cg15633745	54102284	54102286	N_Shore	NDUFA3;OSCAR
		chr10	+	cg07796897	5976261	5976263	N_Shore	IL15RA
		chr17	-	cg17054650	27560133	27560135	NA	KSR1
		chr18	+	cg12473406	21242965	21242967	Island	GREB1L
		chr1	-	cg20991612	43147934	43147936	Island	FAM183A
			*Associated with regulation of ITGB7 expression
			^Associated with BRAF/NRAS mutation status

## Sheet: Supplementary table 5
	Supplementary table 5: GSVA gene signatures
	Verfaillie, A., et al.	Verfaillie, A., et al.	Boshuizen, J., et al.	Hoek, KS., et al.	Hoek, KS., et al.	Hugo, W., et al.	Hugo, W., et al.	Radke, J., et al.	Ben-Porath, I., et al.	Damotte, D. et al.				Radke, J., et al.	Radke, J., et al.									Tirosh, I. et al.	Tirosh, I. et al.	Biermann, J. et al.									Biermann, J. et al.	Biermann, J. et al.	Biermann, J. et al.	Biermann, J. et al.	Biermann, J. et al.	Biermann, J. et al.	Biermann, J. et al.	Biermann, J. et al.	Biermann, J. et al.			Biermann, J. et al.	Biermann, J. et al.	Biermann, J. et al.	MSigDB
	https://doi.org/10.1038/ncomms7683	https://doi.org/10.1038/ncomms7683	https://doi.org/10.1038/s41467-020-17739-8	https://doi.org/10.1158/0008-5472.CAN-07-2491	https://doi.org/10.1158/0008-5472.CAN-07-2491	https://doi.org/10.1016/j.cell.2016.02.065	https://doi.org/10.1016/j.cell.2016.02.065	https://doi.org/10.1038/s41467-022-34899-x	https://doi.org/10.1038/ng.127	https://doi.org/10.1186/s12967-019-2100-3				https://doi.org/10.1038/s41467-022-34899-x	https://doi.org/10.1038/s41467-022-34899-x									https://doi.org/doi: 10.1126/science.aad0501	https://doi.org/doi: 10.1126/science.aad0501	https://doi.org/10.1016/j.cell.2022.06.007									https://doi.org/10.1016/j.cell.2022.06.007	https://doi.org/10.1016/j.cell.2022.06.007	https://doi.org/10.1016/j.cell.2022.06.007	https://doi.org/10.1016/j.cell.2022.06.007	https://doi.org/10.1016/j.cell.2022.06.007	https://doi.org/10.1016/j.cell.2022.06.007	https://doi.org/10.1016/j.cell.2022.06.007	https://doi.org/10.1016/j.cell.2022.06.007	https://doi.org/10.1016/j.cell.2022.06.007			https://doi.org/10.1016/j.cell.2022.06.007	https://doi.org/10.1016/j.cell.2022.06.007	https://doi.org/10.1016/j.cell.2022.06.007	https://www.gsea-msigdb.org/gsea/msigdb/human/geneset/CAHOY_ASTROCYTIC
Cycling cells	Verfailie_Invasiveness	TEAD-regulated invasiveness	Undifferentiated-Neural crest-like	HOEK_INVASIVE_SIG	HOEK_PROLIFEATIVE_SIG	MAPKi_INDUCED_ANGIOGENESIS	MAPKi_INDUCED_EMT	Core progressive genes	BENPORATH_ES_CORE_NINE_CORRELATED	Tumor Inflammation signature (TIS) UP	SMID_BREAST_CANCER_RELAPSE_IN_BRAIN_UP	MAPKi_Escapees_UP	Cell cycle_UP	Ecad-core	CD271-Core_UP	SenMayo_human	BIOCARTA_MET_PATHWAY	Up in NGFR_high	Swoboda_Stat3 pathway target genes	AZARE_STAT3_TARGETS	DAUER_STAT3_TARGETS_UP	HALLMARK_HYPOXIA	HALLMARK_OXIDATIVE_PHOSPHORYLATION	AXL_sig	MITF_sig	MBM_top100	stress_module	mito_module	stress_marsh	stress_vanhove	stress_brink	stress_denisenko	Reactive astrocytes	Reactive microglia	Astrocytes_Biermann	CAFs	Oligodendrocytes	Neurons	Pericytes	Microglia	Oligo	Neurons	Astros_mature	LPS-induced Astroglyosis	MCAO-induced Astroglyosis	MG2_sc	MG_activated_sc	MG2_sn	cahoy_astrocytes
STMN1	POSTN	DKK3	VIT	ADAM12	ACP5	ANPEP	ADAM12	HBA1	ATF4	PSMB10	ART3	DKK1	ARHGEF39	CST5	NGFR	ACVR1B	ACTA1	HIST2H2BF	ADM	CCND2	ABCA1	ACKR3	ABCB7	ANGPTL4	MITF	LHFPL3-AS1	BAG3	AADAT	FOS	PIM3	SDC4	RBM3	SLC39A12	OLR1	PRDM16	COL6A3	CNTNAP4	RBFOX1	EBF1	CCL3	CRYAB	HSPA8	SLC1A3	H2-T23	CLCF1	F13A1	HSPA1B	SESN1	AQP4
TUBA1B	ANPEP	CCDC80	VIPR1	AMOTL2	ADCY2	BGN	AURKA	HNRNPA1P48	BCL11A	HLA-DQA1	BCL11A	CDC42EP1	ATAD2	TFF2	RND3	ANG	CRK	NHSL2	CDA	CDK17	ADM	ADM	ACAA1	FSTL3	TYR	FKBP5	BLOC1S5-TXNDC5	AARS2	HSP90AA1	FOS	KLF6	S100G	HEPACAM	SIGLEC8	AQP4	LAMB1	PLP1	OPCML	CCDC102B	CCL4L2	CDR1	UCHL1	MALAT1	TIMP1	STEAP4	RBPJ	IL1B	MS4A6A	PRODH
TUBB	IL1B	CRIM1	VEGFC	AXL	APOE	BMP4	BCAT1	COL1A2	BCL11B	HLA-DRB1	CCKAR	ACTB	AURKB	C3orf85	DLX2	ANGPT1	CRKL	SMAD5	FZD1	CDV3	AGT	ADORA2B	ACAA2	GPC1	PMEL	NRG3	CALU	AASS	CCL4	ETS2	FOS	FOS	GFAP	SIGLEC10	GPC5	BICC1	RNF220	DSCAM	CARMN	SPP1	APOD	EIF4A2	GLUL	SERPING1	TGM1	FCHSD2	RGCC	OLFML2B	GJB6
TYMS	EREG	PODXL	TWIST2	BIRC3	ASAH1	CDH5	BGN	IGFBP5	CALR	CMKLR1	CDH3	LINC01133	BIRC5	GATA4	FSD1	ANGPTL4	DOCK1	SLC6A6	MGST2	CHP1	AKAP12	AK4	ACADM	TMSB10	PLP1	MAP2	DNAJB1	ABAT	CCL4L2	TGIF1	MAFF	KLF6	SLC1A2	CX3CR1	MAPK4	COL1A1	SLC24A2	FGF14	SLC38A11	CCL2	RPL30	SPARCL1	CPE	SERPINA3N	S1PR3	PDGFC	CCL2	KCNMA1	SLC14A1
HMGB2	COL1A1	VEGFC	TNFRSF12A	CDH13	BIRC7	COL3A1	CDH11	COL6A1	CBFB	HLA-E	CENPF	TRIB3	BRCA1	ACCSL	CRABP2	AREG	ELK1	SLC16A2	POP5	CLIC4	ATF3	AKAP12	ACADSB	SH3BGRL3	GPR143	SAMHD1	DUSP1	ABCA13	CCL3	KLF6	HSPH1	MRPS6	PMP2	TMEM119	SLC1A2	DCN	IL1RAPL1	LRRTM4	PDGFRB	SRGN	RN45S	TPT1	GJA1	H2-D1	PTX3	PDK4	TNF	TBXAS1	CLDN10
RRM2	SERPINB7	IL6	TPM1	CDK14	C21orf91	CYR61	CENPF	EGR1	CEBPB	NKG7	CENPN	MTHFD2	BUB1	PSG4	S100A2	AXL	FOS	LCT	SLURP1	COPA	BCL3	ALDOA	ACADVL	PLAUR	MLANA	MET	EGR1	ABCA9	CCL18	IMPACT	SRSF5	SLC25A5	MAOB	GLDN	RFX4	KIAA1755	NKAIN2	SNTG1	COL4A2	MALAT1	RPL37A	RPL37A	TPT1	GGTA1	S100A10	ITSN1	S100A8	FYB1	SLC25A18
UBE2C	CDH13	TPM1	TPBG	COL13A1	CAPN3	DLL4	CKS2	HSPA1A	CEBPG	CD8A	CHST3	TPM1	BUB1B	ENTHD1	DLX1	BEX3	GAB1	SYN1	AFP	DDX3X	BCL6	ALDOB	ACAT1	NGFR	STX7	LHFPL3	FOS	ABCB10	CCL3L3	SAMSN1	HSP90AB1	CLU	AQP4	ANOS1	CLU	C7	TMTC2	NRXN1	COL4A1	RGS1	RPL31	COX7C	ATP1B2	IIGP1	SPHK1	ATP1B3	DNAJB1	TXNIP	CBSL
HMGN2	PTX3	ITGA5	TLE4	CRIM1	CDH1	EDN1	COL10A1	TNC	CREB3L2	CCL5	COL9A3	PYCR1	CCNA2	OC90	PTPRF	BMP2	GRB2	INPP5J	CDH11	DHX9	C3	ALDOC	ACO2	SEC14L2	IRF4	AKAP12	FOSB	ABCB6	CCL3L1	P2RY10	H3-5	FXYD2	COL21A1		BMPR1B	CFH	CNDP1	MEG3	AC083870.1	CD74	MOBP	GNAS	AQP4	GBP2	TIMP1	FKBP5	LGALS1	ATM	CBS
MKI67	SERPINE1	VGLL3	TOX2	CRISPLD2	CDK2	EMCN	COL11A1	COL6A2	DEK	CXCL9	CP	PSAT1	CCNB1	AC100868.1	FSCN1	BMP6	HGF	ABI2	FZD2	FN1	CCL2	AMPD3	AFG3L2	FOSL1	ERBB3	HIPK2	HIF1A	ABCB7	HSPA1A	PMAIP1	SERPINE1	FXYD6-FXYD2	CHI3L1		SHROOM3	AC092957.1	SLC44A1	GRIK2	DLC1	IL1B	RPS6	RPL31	GPM6A	CP	CD109	SLC40A1	IER3	CD302	GLDC
PCLAF	PXDN	HRH1	TLR4	CYR61	CDK5R1	ID1	COL3A1	NOMO2	DMRT1	CD27	CXCL9	MGST1	CCNB2	PKLR	CYR61	C3	HRAS	KIF16B	MSLN	G3BP2	CEBPD	ANGPTL4	AIFM1	SERPINE1	CDH1	PMEL	HSP90AA1	ABCB8	HSPA1B	SDC4	TUBB6	GS	APLNR		SLC4A4	FN1	PPP2R2B	LRRC4C	PLXDC1	CD83	RPS15A	DYNLL1	LDHB	FBLN5	PTGS2	SRGAP1	JUN	GPR155	MLC1
TOP2A	COL1A2	BDNF	THSD4	DPYD	CEACAM1	KDR	COL5A1	TUBB2A	DR1	CXCR6	DLX5	AKR1B1	CCNE1	SLC45A2	CTXN1	CCL1	ITGB1	PLEKHG5	PRRG2	ITGB6	CTSB	ANKZF1	ALAS1	IGFBP3	GPNMB	MT-ND1	HSP90AB1	ABCB9	ZFP36	CSTB	ZFAND5	H3-5	ANOS1		GFAP	RORA	C10orf90	DLGAP1	MYO1B	ACTB	RPL38	RPL41	CLU	UGT1A	EMP1	AKAP13	CXCL8	AL162414.1	SLC39A12
H2AFZ	LOXL2	LOX	STX1A	EFEMP1	DAPK1	NRP1	COL5A2	COL9A3	E2F1	IDO1	EGFL6	PCLO	CCNE2	CDH1	EHD3	CCL13	JUN	PALM2-AKAP2	SNX10	MCL1	DUSP5	ANXA2	ALDH6A1	TNFRSF12A	IGSF11	ATRNL1	HSP90AB2P	ABCD1	GEM	SRSF5	GADD45G	HSP90AB1	MLC1		GPM6A	SVIL	PCSK6	ATRNL1	EPS8	RPS15A	CLDND1	HSP90AA1	ALDOC	FKBP5	SLC10A6	SNX9	SERPINE1	DERA	PPP1R3G
NUSAP1	PAPPA2	SERPINE1	SYT1	EGFR	DCT	PLAU	COL6A2	TUBB2B	E2F3	STAT1	EGFR	TXNRD1	CCNF	UGT2B7	PTX3	CCL16	MAP2K1	RAET1G	AHR	MMP3	EFNA1	ATF3	ATP1B1	GBE1	SLC24A5	BNC2	HSP90AB3P	ABCD2	KLF2	RUNX1	HSP90AA1	CHKA	ANOS1		GJA1	UACA	TF	RALYL	PDE3A	SGK1	FTH1	RTN1	GPM6B	ASPG	TM4SF1	RNASE1	HTRA1	MTMR1	SLC7A2
CENPF	IGFN1	PDGFC	SYNPO	F2RL1	FAM174B	PPAP2B	COL6A3	RPL17	E2F8	TIGIT	EN1	ASNS	CDC20	ABCB5	TMEM200C	CCL2	MAP2K2	CXCL14	CDYL	NNMT	EFNB2	ATP7A	ATP5F1A	AXL	SLC45A2	ELOVL2	HSP90B1	ABCD3	IER5	OSM	SBNO2	GADD45G			CTNNA2	IGFBP2	PRUNE2	DPP6	CACNA1C	CCL3L3	RPS11	CALM2	NTRK2	PSMB8	B3GNT5	PSME4	S100A9	CSGALNACT1	TTPA
CDK1	ITGA11	STC2	STRA6	FGF2	GALNT3	PROK2	DTL	RPSA	EED	LAG3	FOLR1	UGCG	CDC25A	PSG9	CNTN6	CCL20	MAP4K1	C3orf80	GPC1	NUP160	FEM1C	B3GALT6	ATP5F1B	PHLDA2	RAP2B	MT-ND3	HSPA1A	ABCF2	EGR1	MAFF	DDX3X	PIM1			DPP10	ABCA9	KCNMB4	RIMS2	GJC1	RPL30	RPL41	ATP1B1	SAT1	GBP10	HSPB1	NHSL1	TREM2	FGD2	TNC
ASPM	ITGBL1	COL5A1	STC2	FLNB	GNPTAB	PRRX2	EPYC	NDRG1	ELF4	CD274	GDF5	GARS	CDC45	PRSS21	PHLDB2	CCL24	MAPK1	LINC01963	MTAP	NUP188	FGA	B4GALNT2	ATP5F1C	MAP1B	ASAH1	ARID5B	HSPA1B	ABHD10	NFKBIZ	CCL1	SLC38A2	CLDN10			RYR3	COL6A1	NCKAP5	FGF12	CDH6	RPL23	RPL23	CALM1	CST3	SRGN	CD14	FMN1	CTSL	GCC2	FGFR3
H2AFV	KRT81		SPRED3	FOXD1	GPM6B	RHOB	FAP	PAGE5	ELF5	PDCD1LG2	HOXA9	EFEMP1	CDC6	CLDN14	FLRT3	CCL26	MAPK3	FAM20A	PTN	PCDH7	FGB	BCAN	ATP5F1D	GMNN	MYO10	ABTB2	HSPA6	ABHD11	JUND	KLF4	KLF4	HSP90AA1			ID4	COL6A2	UNC5C	SHISA9	RNF152	RPS11	CCL4	RPL23	NDRG2	CXCL10	GALNTL2	ELMO1	MEPE	FKBP5	GLI3
HMGB1	EDIL3		SPOCD1	FST	GPR143	ROBO4	FCGR1B	ANP32B	EN1	CD276	IGHV3-23	SLC3A2	CDK1	PSMA8	SERTAD4	CCL3	MAPK8	CAMK2N1	TFPI	S100A9	FGG	BCL2	ATP5F1E	SLC22A4	GRN	COL25A1	HSPB1	ACAA1	RGS1	SLC38A2	PNP	HSPA8			FAM107A	CDH11	PLEKHH1	CACNA1A	ITGA1	B2M	C7orf41	HSP90AB1	ATP1A2	AMIGO2	IGFBP3	ZNF331	LINC00910	SSH2	TMEM47
CCNA2	AXL		SPOCK1	FZD2	GPRC5B	SOX17	FN1	COL4A2	ETV6		IGHV4-61	TNFRSF12A	CDK2	PMEL	GLI2	CCL3L1	MET	COL1A2	AK5	SRSF6	FLNB	BGN	ATP5MC1	TYMP	DOCK10	MT-ND5	HSPH1	ACAA2	JUN	CHKA	NCOA7	FOSB			ADCY2	F3	SGK1	STXBP5L	PRR16	FTL	ACTB	SERINC1	GAPDH	HSPB1	KLF5	SGMS1	RGS16	DAPK1	ENTPD2
ZWINT	COL5A1		SLC2A1	HEG1	GYG2	SOX18	GREM1	ARHGDIA	ETV7		IMPA2	TPM4	CDKN3	TKTL1	AJUBA	CCL4	PAK1	LOXL3	CEBPA	THBS1	FOSL1	BHLHE40	ATP5MC2	TREM1	ACSL3	IMMP2L	IER2	ACACA	DUSP1	TNIP3	RHOH	ZFP36L2			PTPRZ1	CEMIP	SPOCK3	TMEM132B	SMOC2	GPR183	TF	CCK	PTN	OSMR	CXCL10	DAPK1	IER2	ZC3H6	CHRDL1
BIRC5	OAS2		SLC16A2	HS3ST3A1	HPS4	TGFB2	IGHM	COL5A2	EZH2		KCNK5	HEBP2	CENPA	MAT1A	MMP2	CCL5	PIK3CA	APLP1	GPM6B	TNC	GFPT2	BNIP3L	ATP5MC3	RIN1	SORT1	PRELID2	JUN	ACACB	TXNIP	RAB20	HIPK3	BTG1			KCNN3	ROR2	PEX5L	CSMD3	NBEAL1	RN45S	TUBA1A	RPS15A	FTL	GFAP	CD44	CXCL10	FABP5	DICER1	ADHFE1
CCNB2	EMILIN1		SLC14A1	ITGA2	INPP4B	THBS1	INHBA	TUBA1C	FOXC1		KIFC1	MT1X	CENPE	OCA2	SLC18A1	CCL7	PIK3CG	STEAP2	MTSS1	TP63	HEG1	BRS3	ATP5ME	S100A4	QPCT	MT-CO3	JUNB	ACAD10	RHOB	CCL3	NCKAP5L	HSPB1			AC012405.1	FBN1	ZNF536	ADGRB3	NOTCH3	OLR1	SCD	RTN3	GLUD1	IER3	HMOX1	FCHO2	C12orf57	CHPT1	SLC7A10
TK1	AMIGO2		SLC12A8	ITGA3	IRF4	THY1	KIF2C	CAVIN1	FOXG1		KRT16	SLC1A5	E2F1	C5orf38	ITGB5	CCL8	PIK3R1	CHST7	PTPRF	TWF1	ICAM1	BTG1	ATP5MF	COL6A2	S100B	XIST	NFKBIA	ACAD11	ATF3	CCL18	SLC10A6	IGFBP7			MAOB	EBF1	KLHL32	ADGRL3	IGFBP7	RPL37A	SOX2-OT	RPL38	AHCYL1	IFITM3	LGALS3	RGL1	BIN1	AC053513.1	PDK4
CENPU	FBN2		SMAGP	KCNMA1	IVNS1ABP	VEGFA	LOXL2	HNRNPA1L2	FOXK2		LDHB	RAB32	ESCO2	OR5J2	SLIT2	CD55	PTEN	DLG4	TGFB1		IGFBP1	CA12	ATP5MG	TENT5A	MYC	CCND3	NFKBIZ	ACAD8	JUNB	CCL3L3	CEBPD	ZFP36			FAM189A2	LAMC3	TMEM144	NRCAM	GRM8	RPL31	SPP1	RPL30	RPL41	S1PR3	OSMR	FOXN3	TEX14	IL15RA	EGFR
ASF1B	ISG15		SLIT2	LOXL2	KAZ	VEGFC	LRRC15	IGFBP4	FOXM1		MCM10	KCNG1	FAM83D	TRPM1	SERINC2	CD9	PTK2B	MYCBPAP	ALDH3A1		JUN	CASP6	ATP5PB	CITED1	LZTS1	PPARGC1A	RGS2	ACAD9	NFKBID	CCL3L1	DCN	SRGN			TPD52L1	PDGFRA	TTLL7	FAM155A	RBM20	RPS6	RPL5	VSNL1	S100B	SULF2	GAP43	SIPA1L1	HAMP	ABHD12	TLR3
DLGAP5	COL12A1		SDK1	MYOF	MBP		MMP11	COL12A1	GATA6		MCM5	FLNA	GMNN	OR9G1	B3GALT2	CSF1	PTPN11	SFXN5	CEBPB		KLF11	CAV1	ATP5PD	S100A10	GYG2	MT-ND4	SLC2A3	ACADL		GOT1	SRF	PPP1R15A			ACSBG1	LTBP2	MAP7	LRRC7	UACA	TMSB4X	DBNDD2	BEX2	AGXT2L1	HSPB6	GDF15	FOXO3	APOC2	PARP4	SLC4A4
KIFC1	SRGN		STAC	NRP1	MICAL1		NCAPG	NGFR	GATAD2A		MMP7	SLC7A5	GTSE1	ABCC2	SLC35F1	CSF2	RAF1	PRKAR2B	GRB10		LBP	CAVIN1	ATP5PF	UTS2	SDCBP	AC004889.1	SOCS3	ACADM		CCL7	HSPA1A	EEF1A1			FMN2	COL5A2	DNAJC6	NRG3	RBPMS	FTH1	RPL27	SYT1	C1orf61	ENDOU	FLNC	CSGALNACT1	FSCN1	HERPUD1	CYP4F2
CDT1	SCG2		SLFN11	NTM	MITF		NID2	MAGEA4	GTF2H4		PRAME	ANXA2	HJURP	PRDM7	FIBCD1	CSF2RB	RAP1A	B4GALNT1	MYCN		LDLR	CAVIN3	ATP5PO	SPHK1	LOXL4	ITPR1	UBC	ACADS		TUBB6	HSPA1B	UQCRB			ARHGEF4	RBMS3	DNM3	KCND2	EDNRA	RPL41	RPS13	BEX1	TSPAN7	SLC39A14	SBNO2	FNBP1	H3F3B	SARAF	PPP1R3C
CLSPN	TOX2		S100A2	NUAK1	MLANA		NUAK1	NOMO3	GTF3C2		PRKX	FTH1	HMMR	IL36RN	KLF5	CST4	RAP1B	FNDC4	PTPRS		NPC1	CCN1	ATP6AP1	TRIML2	ETV5	ST3GAL1	ZFAND2A	ACADSB		H3-5	TRIB1	KLF2			MGST1	COL5A1	PDE4B	GRM7	CASC15	CH25H	RPL35A	LDHB	CRYAB	TAPBP	ANXA2	STARD13	HSPB1	AL162253.2	PLA2G7
AURKB	FBN1		ROBO4	OSMR	MYO1D		RRM2	RPL7	HDAC2		PTX3	FTL	KIF11	HTN1	CDH24	CTNNB1	RAPGEF1	MAP1B	TGM2		PALM2AKAP2	CCN2	ATP6V0B	HRNR	GLMP	MTSS1	ZFP36	ACADVL		CKS2	DJB4	FUS			SORBS1	FAP	SLAIN1	GRM5	NR2F2-AS1	P2RY12	CALM2	GPM6A	FTH1	CRISPLD2	TUBB6	FOXP1	FCGR1A	RCSD1	SLC1A3
CENPW	DKK3		RAB27B	PDGFC	NR4A3		SLC16A3	XAGE1A	HIF1A		RARRES1	CYR61	KIF20B	OR7C1	SLC29A4	CTSB	RASA1	DLG3	APOL6		PFKFB3	CCN5	ATP6V0C	TMEM45A	HMCN1	TRPM1	ZFP36L1	ACAT1		ZFAND5	KLF9	NFKBIA			SLC25A18	LINC01088	CDK18	XKR4	ENPEP	RPL5	RPS4X	UQCRH	RPL30	GSR	SRXN1	PSTPIP2	ALOX5AP	FTX	SLC1A2
CDCA8	FLNC		PKIA	PODXL	OCA2		SULF1	TTYH3	HIVEP1		SCRG1	PHGDH	KIF23	KRTAP19-1	CNIH2	CXCL1	SOS1	FN1	CEBPD		PLA2G6	CCNG2	ATP6V0E1	CDKN1A	OSTM1	DAAM2		ACCS		CD83	FOSL2	CKB			MLC1	FLRT2	OTUD7A	GRIN2B	ARHGAP42	RPL27	RPS12	C14orf2	DBI	TSPAN4	TNFRSF12A	TBXAS1	CROCC	PTEN	DIO2
GTSE1	COL5A2		PRSS23	S100A2	PHACTR1		TNFAIP6	RPL18A	HMGA1		SFRP1	TUBB2A	KIF4A	CST2	FLNC	CXCL10	STAT3	NTM	HS6ST2		PLIN3	CDKN1A	ATP6V1C1	UBE2C	ALDH7A1	POLR2F		ACLY		PIM1	MYC	PNRC1			PAMR1	ITGA8	MOG	GRIA2	MRVI1	RPL38	HSP90AA1	RPL35A	RPL37A	CXCL1	ASNS	TXNIP	AC245014.3	AC010894.3	ACSBG1
UHRF1	THBS1		PAPPA	SLC22A4	PIR		VCAN	RPS27	HMGB2		ST8SIA1	MYL12A	MAD2L1	DCT	OAF	CXCL12		ELOVL4	NDN		PLPP3	CDKN1B	ATP6V1D	ERO1A	FOSB	EYA1		ACN9		DDX3X	CEBPB	HSPA1A			DCLK2	CCN4	LINC00609	CNTN1	ADGRF5	FCER1G	EEF1A1	TMEM66	FAM107A	GBP3	CTGF	AC084871.1	CAPG	SLCO2B1	PAPSS2
PKMYT1	WNT5A		PRDM1	SLIT2	PLXNC1			ATN1	HMGB3		TMSB15A	G6PD	MCM2	ATP6V0A4	PRR16	CXCL16		STC1	RNF103		SAMD4A	CDKN1C	ATP6V1E1	SLC16A6	RAB38	AL157871.4		ACO1		MAFB	PNRC1	HSPA1B			GLIS3	LAMA4	BCAS1	SCN1A	TFPI	A2M	RPS8	ACTB	ACTB	IRGM1	GCNT2	MAN1A1	LDHA	TATDN3	KCNE5
CDCA5	TGM2		KCNMA1	SYNJ2	PMEL			OLFML2A	HSF1		TNFRSF21	MARCKS	MCM4	DNASE2B	ADGRB2	CXCL2		BMPER	THBS2		SERPINB3	CHST2	ATP6V1F	CHI3L1	ELOVL2	CDH1		ACO2		PLIN2	IDI1	ESM1			AC114971.1	NR2F2-AS1	HS3ST5	SORCS3	MIR4435-2HG	DBI	QDPR	TMSB4X	HTRA1	OLFM1	CP	GNAQ	CCL5	C2CD5	BMPR1B
GGH	NRP1		KCNN4	TCF4	RAB27A			NUDT4B	HTATIP2		TRIM29	NUPR1	MCM5	ANXA3	GPC3	CXCL3		TREM1	AQP5		SLC2A14	CHST3	ATP6V1G1	FN1	MLPH	MLPH		ACOT13		ING2	KLF2	IER3			SLC16A9	PLA2R1	HDAC2-AS2	GPM6A	COBLL1	ITM2B	SAT1	RPL27	RPS15A	H2-T10	HMGA1	DPYD	AC253572.2	TM7SF3	HAPLN1
RAD51AP1	LOX		PODXL	THBS1	RAB38			SKI	ID4		TTLL4	TMSB4X	MCM6	IRX6	F2RL2	CXCL8		GGN	CLEC14A		SLC2A3	CITED2	ATP6V1H	S100A16	PLK2	MT-CO1		ACOT2		TOB2	DUSP8	EGR1			RMST	FBLN2	QKI	FMN2	AC019197.1	HSP90AA1	RPL11	SCG2	HSPA8	CHI3L1	GADD45B	MED13L	ZFP36L1	CSF1R	NTSR2
SPC25	ADAM19		PDGFRB	TLE4	RGS20			POLR2J	ILF2		VGLL1	THBS1	MKI67	CDK15	CTGF	CXCR2		AARD	ICA1		SLC4A7	COL5A1	BAX	CNRIP1	CHL1	GAS7		ACOT7		RLIM	PXDC1	NR4A1			AC007389.1	THSD4	ARHGAP21	TNR	NID1	RPS13	RNASE1	TUBA1B	FAM171B	VIM	VGF	PDE3B	SLC2A3	RNASEH2B	CCDC80
TPX2	STC2		PLAUR	TNFRSF11B	RHOQ			BGN	ILF3		VSNL1	HMOX1	MYBL2	DACT2	LOXL3	DKK1		PTPRN	NFIX		SOCS3	CP	BCKDHA	SLC25A37	RDH11	NIBAN1		ACOT9		OSER1	OXD1	JUN			OBI1-AS1	TRIO	MAN2A1	LRP1B	AC012409.2	RPL35A	TMSB4X	CDR1	RPL31	C4B	ANXA3	PICALM	PPP1R15A	OSTF1	MERTK
CDKN3	IL8		PXDN	TPBG	RRAGD			JUNB	IRF1		WWTR1		NUF2	QPCT	EMID1	EDN1		KALRN	RPL39L		SOD2	CSRP2	BDH2	LCN2	LINC00473	AC009562.1		ACOX1		WSB1	IRF8	VPS37B			C3	MGP	CLDN11	MAP2	LPP	RPS20	MALAT1	SOD1	GPRC5B	B2M	SERPINA3N	SIGLEC1	HSPA5	USP24	ALDOC
CKS1B	COL6A2		PTX3	TPM1	SEMA6A			HBQ1	KDM1A				NUSAP1	TSPAN10	UHRF1	EGF		PSD2	TMEM98		STAT2	CXCR4	CASP7	ENO2	RELL1	ANKRD30B		ACOX3		HSP90AB1	HSPB1	B2M			AC092691.1	CALD1	CNTN2	CADM2	EPAS1	RPS4X	PTMA	YWHAE	S100A13	A2M	ASPG	CELF2	VIM	ITSN1	FZD2
UBE2T	LTBP1		NMNAT2	TRAM2	SIRPA			MIDN	KLF11				PLK1	PLA1A	CUEDC1	EGFR		TXNDC15	BCAR3		STAT3	DCN	COX10	PFKFB4	C21orf91	KCNQ5		ACP6		CCL4	GEM	BTG2			LSAMP	BNC2	AL139294.1	SCN1A-AS1	TBX2	RPL11	ERMN	MRFAP1	HEPN1	SLC22A4	VIM	CHKA	ADGRG1	CCND3	ACOT11
SMC2	MMP2		NRP1	WNT5A	SLC45A2			UPK3BL1	KLF5				PRC1	BMX	IL6	EREG		PCNX2	CNP		TEAD4	DDIT3	COX11	SLC16A3	SCAMP3	MT-ATP6		ACSF2		CCL4L2	BAG3	CLDN4			LMO2	FBLN1	ENPP2	CDH18	COL1A2	EEF1A1	UBB	TSPAN7	MBP	NEK6	ODZ2	MERTK	HS3ST1	SLC35G2	GFAP
CDCA3	PODXL		NGEF	ZEB1	ST3GAL6			SERPINE1	LMO4				RFC3	KIF6	GPT2	ESM1		NOS2	IGFBP7		THBS1	DDIT4	COX15	DBNDD2	SGK3	PLEKHA2		ACSF3		TMEM251	ANKRD1	NDUFC2-KCTD14			NEBL	COL18A1	DLG1	CADPS	ABCC9	RPS8	FTL	TUBA1A	YWHAE	SORBS1	AKAP12	AP2A2	HSP90AA1	TENT2	F3
DIAPH3	FGF2		NEGR1		STX7			XAGE1B	MAFG				RFC4	PRSS33	GP1BB	ETS2		NNMT	NT5E		TRIB1	DPYSL4	COX17	LOXL2	ABCB5	WARS		ACSL1		HSP90AA1	ZFP36	NDUFC2			SCARA3	TPM1	CERCAM	SNAP25	PTPRG	C3AR1	S100B	RPS4X	PEA15	GM3579	C730049O14RIK	MIS18BP1	CALR	TLR2	CTH
NUF2	CYR61		NRG1		TNFRSF14			NBPF14	MDFI				RRM2	LGSN	ALPK2	FAS		MEDAG	SALL1		UGCG	DTNA	COX4I1	CFB	SLC7A5	GYG2		ACSL4		NFIL3	ATF4	IER2			ALDH1L1	COL13A1	MYRF	SCN2A	SOX5	RPS16	RPS14	RPL5	RPS11	CD44	GFAP	IQGAP2	SCIN	TNFAIP2	PBXIP1
CKAP2L	NPTX1		NTN4		TRPM1			NBPF20	MED8				TACC3	APOC4-APOC2	DENND2A	FGF1		RTL5	TRIM44		ZFP36	DUSP1	COX5A	CADM1	SIRPA	FGD4		ACSL6		GADD45G	OSGIN1	MT1G			WDR49	RBPMS	CARNS1	UNC80	PTH1R	EGR1	YWHAE	STMN1	RN5-8S1	IGTP	ICAM1	MEGF9	IFI30	PPFIBP2	SLC15A2
CENPN	CRIM1		MT2A					LOX	MLXIP				TOP2A	APOC2	NACAD	FGF2		SNRPB2	BCL2			EDN2	COX5B	LTBP2	WDR91	CADPS2		ACSM1		SMAD7	SQSTM1	MDH1			CTNND2	MIR100HG	MBP	MDGA2	TBX15	CX3CR1	DBI	ATP5B	TUBB2B			DISP1	PLAU	SNHG14	AGT
HMMR	THSD4		MT1E					NBPF10	MSL3				TPX2	SPATS1	CDR2L	FGF7		KCTD17	CPEB1			EFNA1	COX6A1	CD109	PIGS	MT-CO2		ACSM2A		HMOX1	TUBB4B	CD28			NRCAM	LINC02147	FOLH1	SNHG14	JAG1	MYL6	HSPA8	NGFRAP1	COX7C			PLCL1	IER5	MAP3K3	TLCD1
KNL1	DKK1		MPP4					POLR2J2	MYBBP1A				UBE2C	APOC4	EPHB4	GDF15		DOCK4	IL6			EFNA3	COX6B1	AIM2	CYP27A1	BCL2		ACSM3		GCH1	ZFP36L2	H3-3B			ATP13A4	COL4A2	SOX2-OT	CNTNAP5	FHL5	CCL3L1	GPM6B	COX7B	CALM2			TFRC	BCL2A1	KIAA0513	ATP1A2
CDC20	FAM20C		LOXL2					TGFB1	MYBL1					NSG1	EPHB3	GEM		FAM168A	NTN1			EGFR	COX6C	TCN1	TM7SF3	MAPK4		ACSM5		SLC15A3	IFRD1	DUSP1			STON2	PARD3	AKAP6	HS6ST3	APBB2	IL8	OPALIN	HINT1	DYNLL1			NLRP3	CCDC200	SLC22A23	SLC9A3R1
HIST1H4C	C12orf75		LDOC1					HBZ	MYBL2					DHRS2	FAM171A2	GMFG		VSIR	SCARA3			ENO1	COX7A2	STRA6	PTPRZ1	NCAM1		ACSS1		FOSB	ZFP36L1	UBC			AL392086.3	PPFIBP1	UGT8	IL1RAPL1	PHLDB2	HSP90AB1	DYNLL1	SLC1A2	MT3			ARHGAP18	AC131944.1	USP3	RFX4
KIF2C	EPHA2		LAMB3					NPIPA8	MYC					MLANA	KIF18B	HGF		CLMP	TWIST2			ENO2	COX7A2L	CARD19	CNDP2	TTN		ACSS3		HSPA1A	CSRNP1	JUND			RAMP1	COL11A1	SHROOM4	ERC2	GUCY1A2	DUSP1	RPS20	YWHAZ	ALDH2			NAMPT	KLF2	EPG5	ALDH1L1
TROAP	NNMT		JUN					CTAG2	NFE2L3					TTC39A	COL20A1	HMGB1		TRIM14	BCL2L1			ENO3	COX7B	DDR1	CTSK	OTUD7B		ACYP2		HSPA1B	NFKBIA	RHOB			AC079385.1	LHFPL6	RAB40B	LSAMP	FN1	EIF1	COX7C	RTN4	RPL23			IRAK3	CCL4	IFI16	GRIN2C
APOBEC3B	PLAUR		IL31RA					NPIPA5	NFIB					BCAN	IER3	ICAM1		IGFBP3	CRIP2			ERO1A	COX7C	TBC1D8	BNC2	RUNX1		ADCK1		HSPA5	RIPK1	JUNB			WWC1	CYP1B1	MOBP	PTPRN2	SGIP1	C3	RPS25	RPS24	ATP5B			RNF213	PDPN	PRMT2	CYBRD1
KIF23	ITGA2		IL11					NBPF19	NFIL3					BFSP2	SLC35E4	ICAM3		NDRG4	KCNN4			ERRFI1	COX8A	METTL7B	TOB1	MT-ND4L		ADCK2		SERTAD1	HSPA8	DDX5			STK33	GGT5	FA2H	RGS7	COL18A1	HSPA8	B2M	NACA	SERPINE2			PEAK1	SYNDIG1	RBMS3	VCAM1
KIF15	MYLK		IL1B					NFIC	NFKBIE					SOHLH2	SLC45A3	IGF1		VIT	NUPL1			ETS1	CPT1A	GADD45A	CELF2	PYGL		ADCK3		ERRFI1	WAC	ELF3			RGMA	FHL2	EDIL3	CNTNAP2	RBMS3	FOS	TP53INP2	STMN2	PTPRZ1			ZFAND5	RHOB	BCAS3	PLCD4
CENPM	COL6A1		ITGA3					TUBB3	NMI					KIF17	TMEM179	IGFBP1		ANO1	SEC61B			EXT1	CS	UPP1	ROPN1	ST6GALNAC3		ADCK4		GLA	SAT1	ACTG1			NTRK2	NID1	TRIM2	SYN2	NR2F2	RPS14	NACA	APP	SCG3			MAF	SERPINA1	NT5C3A	SOX9
CDCA2	TPM2		ITGA2					SEZ6L2	NSD2					KCNN2	B4GALNT1	IGFBP2		IL15	ULK1			F3	CYB5A	SPATA13	TMEM98	FXYD3		ADCK5		LAIR2	ITPKC				ARHGEF26	SRPX2	PTPRK	TRIM9	PARD3	RPS12	PFDN5	INPP5F	SRI			ITPR2	TUBA1A	SGK3
CENPA	FLNB		IGFBP6					RPS26	PAX6					GJB1	INAVA	IGFBP3		CLIP3	BHLHB9			FAM162A	CYB5R3	GLRX	CTSA	ECHDC2		ADHFE1		BCL2A1	BRD2				LRIG1	ITIH5	GLDN	CHL1	FRMD3	B3GNT5	FOS	GAPDH	RHOA			RBMS3	CTSZ	ABHD15-AS1
NCAPG	ERRFI1		ID1					BOLA2	PLAGL2					FCRL1	FBLN2	IGFBP4		JAKMIP2	CYP1B1			FBP1	CYC1	PPFIBP1	LIMA1	NAALADL2		AFG3L2		PPP1R15A	RAP1B				SERPINA3	TMEM132C	FRMD5	ATCAY	COL3A1	CD63	MRFAP1	CXCL14	GNAS			ARHGAP24	S100A11	NOD1
NCAPH	IGFBP3		INHBA					POM121	PNRC1					LHFPL1	CDC42EP2	IGFBP5		SLC45A1	KCTD18			FOS	CYCS	PMAIP1	CD99	MAPK10		AGK		PVR	IL6				AHCYL2	THBS2	DSCAML1	IGSF9B	TRPC6	PDK4	KIAA1598	EID1	DPYSL2			CCNH	FPR1	DPEP2
MAD2L1	GPR176		HRH1					THBS1	POLR1E					SFTPC	MYBL2	IGFBP6		FSD1	OPTN			FOSL2	DECR1	COL6A1	IGSF8	SGK3		AGMAT		SKIL	IER3				AC091078.1	IGFBP7	ABCA2	GRID2	AC106845.1	TUBA1B	PTP4A2	NDUFA1	TMBIM6			MT-ND3	TAGAP	PAN3
PLK1	IFI6		GAS6					RPL21	RBL1					CNDP1	GDNF	IGFBP7		CLU	SETD6			FOXO3	DLAT	JMJD6	FDFT1	OR2A1-AS1		AGPAT5		SIAH2	BTG1				LGI1	COL4A1	CD22	NLGN1	LAMA4	RPLP2	GLUL	MAP1B	RPL38			EPS15	CORO1A	XPO1
FEN1	ITGA5		GLIPR1					ADGRB1	RELB					CXorf65	ADAMTS7	IL10		KCNA4	UPP1			GAA	DLD	CIB1	CPNE3	MYO1D		AGR2		IER3	GADD45A				PAX6	AC012404.1	LINC01608	CACNG8	KIRREL1	MAT2A	HSP90AB1	TCEAL2	PRDX1			TCF12	SLC3A2	MAX
HJURP	SPOCK1		GFRA1					COL5A1	RUNX3					CTSE	DDAH1	IL13		GLIS3	BIRC3			GALK1	DLST	HPCAL1	SLC35B4	SAMMSON		AGXT		BTG1	SKIL				F3	EPHA3	CADM2	AGBL4	ARHGAP29	NACA	SLAIN1	PFDN5	HSP90AA1			STAB1	PLAUR	LEPROTL1
FANCI	OSMR		GATA3					POM121C	SAP30					CA14	SLITRK6	IL15		ZNF287	DDIT4L			GAPDH	ECH1	MT2A	EIF3E	NBPF11		AGXT2		G13	CEBPG				FGFR3	NR2F1-AS1	KCNH8	CA10	CYTH3	RPL19	RHOA	SAT1	UBB			MT-ND2	SOD2	PNISR
DEPDC1B	LAMB3		GPR176					GATAD2B	SIX3					EDNRB	PRICKLE2	IL18		RASL12	MAB21L1			GAPDHS	ECHS1	TUT7	TNFRSF14	DIP2B		AHCYL1		TLR2	PPP1R15A				MROH7	ZEB1	PHLPP1	MYT1L	CHSY3	CD53	FEZ1	UBB	MRFAP1			VAMP5	YWHAH	FCHO2
CEP55	TBX3		FZD2					SV2A	SMARCA4					IRF4	TSPAN13	IL1A		ITGB5	PCDHB7			GBE1	ECI1	CXCL8	SLC18A1	KCNJ13		AIFM1		SRGN	SRSF7				SOX6	EPS8	KIRREL3	PAK3	EBF2	PABPC1	RPS29	GABARAPL2	EDNRB			ZEB2	UBC	PRKCD
HMGB3	FERMT3		FJX1					UBE2S	SOX10					ISM1	CLDN4	IL1B		C16orf45	SETDB1			GCK	ETFA	TRIM47	HPS5	RGS20		AIFM2		BRD2	ERRFI1				SPARCL1	AMOTL1	USP54	DAB1	DENND2A	LYVE1	OMG	RPS11	F3			CD163	PPIB	ITPR1
MCM7	MT2A		FOSL1					TMEM158	SOX11					KAAG1	PDZD4	IL2		ST8SIA5	VLDLR			GCNT2	ETFB	SESN2	CDK2	GAREM1		AIFM3		TNF	HSPA5				NPAS3	NR2F1	NCAM2	PPFIA2	COL5A2	RHOA	RTN4	ATP5J	KCNJ10			SRGAP2	PKM	AFF1
DTL	ANTXR2		FOXF1					NR4A2	SOX4					LGI3	IQGAP3	IL32		MEGF11	BIRC5			GLRX	ETFDH	NECTIN2	CAPN3	KIRREL1		AK2		CLIC4	FOSB				AL356737.2	TBX18	SIK3	PLCB1	AC113386.1	HLA-DRA	LPAR1	NGRN	SCD			CBLB	SH3BGRL3	TGFBR2
GAPDH	LMO7		FBLIM1					NPIPA1	SOX9					CAPN3	SLC12A8	IL6		CLDN2	EBF1			GPC1	FDX1	DRAP1	SUSD5	PVT1		AK3		TOB1	GCC1				LINC00299	APOD	DIP2C	CHRM3	ARHGAP10	GNAS	PLEKHB1	ATP5E	OMG			HERPUD1	HM13	AC012368.1
KIF11	CAV1		FLNB					NOTCH3	SPIB					AC012651.1	G0S2	IL6ST		EFHC2	MARK1			GPC3	FH	MTHFD2	ADSL	MYO10		AK4		DJB9	NFKBIZ				AC110023.1	MIR99AHG	PXK	SYT1	RASAL2	DDX5	SERINC1	RPL15	DKK3			RBM47	TIMP1	WDR41
TCF19	NCEH1		FAM83G					ATAD3A	SRF					ANXA13	LMO7	IL7		THBS1	PCOLCE2			GPC4	FXN	SDC4	PIGY	MT-ATP8		AKAP1		HSPA8	BTG2				ZNRF3	MEG3	POLR2F	MMP16	TNS1	LAPTM5	LDHB	USMG5	GFAP			CPM	HSP90AB1	PHC3
PCNA	CSF1		FAM20C					SRGAP2B	SSRP1					PPARGC1A	LOXL2	INHA		INHBB	SFRP2			GPI	GLUD1	NNMT	PON2	CERS4		AKAP10		IL1B	BHLHE40				CDH4	MRC2	LRRTM3	ASTN1	LZTS1	TRIB1	RPS16	CCL4	DDAH1			ANKS1A	HSPD1	STK24
SGO1	HEG1		FAM171A1					CNN2	STAT1					BAIAP2L2	PPP1R18	IQGAP2		TNFRSF25	VNN1			GRHPR	GOT2	PPL	SLC19A1	FBXL7		AKR1B10		CSRNP1	NOP58				FAM155A	RND3	DOCK5	CACNA1B	DAAM2	RPS24	ENPP2	COX6C	RPS6			MS4A6A	CTSD	INTS10
DUT	FOSL1		FAM155A					ADAMTS4	SUPT5H					TRIM51	MSLN	ITGA2		EGR1	BST1			GYS1	GPI	TIMP1	KLF6	PRKCA		AKR7A2		NFKBIA	HSPE1				ITGB4	PDZRN3	MAGI2	SLC35F1	ZFHX3	ADORA3	RPL26	MDH1	DTNA			MKLN1	APOC1	ZDHHC7
CENPE	EPAS1		ERRFI1					CXCL8	TAF2					CDK2	CYP27C1	ITPKA		GAP43	EPDR1			HAS1	GPX4	RHOC	MAGED1	ARHGAP31		ALAS1		ZFP36L1	DES				IGFBP7	FSTL1	GSN	PCDH15	SPARC	RPS25	PKP4	BASP1	SOD1			SLC9A9	ATP2B1-AS1	ELMO1
MND1	AJUBA		EFNB2					NBPF9	TBPL1					FXYD3	GLRB	JUN		AXL	MCL1			HDLBP	GRPEL1	GNB2	ERGIC3	APBB2		ALAS2		IFRD1	IER5				ATP1B2	STRA6	PCDH9	TMEM132D	FBLIM1	NEAT1	PTPRZ1	RPS29	RPL5			AOAH	CDKN1A	GATAD1
SPAG5	BCAT1		DPYD					S100A4	TBX19					DCDC2	E2F2	KITLG		TGM2	PIK3R1			HEXA	HADHA	PDXK	PIR	LINC00513		ALDH18A1		BAMBI	EGR1				RGS20	ADAMTS12	ANO4	ATP8A2	MCAM	ALOX5AP	BCAS1	RPS6	PON2			SRGAP2B	ID2	NBPF1
RAN	NFE2L3		DKK1					NCOR2	TCF20					GAPDHS	AGMO	LCP1		AQP1	SIPA1L2			HK1	HADHB	CTNNA1	SLC25A5	PDE10A		ALDH1B1		ZFP36L2	TNFAIP3				DST	SPTBN1	AMER2	SLC24A2	LIN7A	DNAJA1	EIF4A2	YWHAH	IGFBP7			ATF6	COTL1	INPP5D
CKS2	TPM1		DOCK5					ITGA5	TCF7L1					ROPN1	C3orf52	MIF		PODXL	CCND1			HK2	HCCS	CD52	JUN	STOX2		ALDH1L1		EIF4A1	MAFK				RANBP3L	RASAL2	AC008571.2	SLC4A10	CFH	SLC1A3	RPS24	ATP5A1	PPAP2B			SEC14L1	HMOX1	MPZL1
ORC6	PLOD2		CYR61					JAG1	TEAD4					TTR	PLEKHH3	MMP1		GRIA2	FBN1			HMOX1	HSD17B10	SLC2A1	ARPC1B	MTHFD1L		ALDH1L2		CDKN1A	TPM3				LRRC3B	PDLIM1	SPOCK1	SNAP91	CNTN4	BCL2A1	NCL	RPS13	CD63			ARL15	HSPA8	TBC1D15
FAM111B	SMURF2		CLMP					POLR2J3	TFAP2C					KIAA1024	AC140504.1	MMP10		MRC2	MGP			HOXB9	HSPA9	BRIP1	SLC19A2	AKAP9		ALDH2		ETF1	UBC				NRG3	PCOLCE	TMEFF2	GRIA1	TRPC4	ST6GAL1	EIF1	ATP5J2	ADD3			UTRN	TSPO	BICRAL
KIF14	QSOX1		COL13A1					SETSIP	TFCP2L1					TBC1D7	LRRC15	MMP12		ANO4	PMAIP1			HS3ST1	HTRA2	ARHGEF2	AKR7A2	IFI16		ALDH3A2		ATF4	KCNE4				LAMA1	IL1R1	ENOX1	NEGR1	PARVA	UBC	DPYSL2	CCNI	CSRP1			AL162414.1	DUSP2	TMEM51
CENPH	ERAP2		COL12A1					SPDYE6	TFDP1					PDE11A	TMEM108	MMP13		KCNG1	SLIT3			HSPA5	IDH1	UBE2J1	HPGD	SEPTIN9		ALDH4A1		SQSTM1	PCF11				CRB2	ABCA9-AS1	PTGDS	MACROD2	SLIT3	MCL1	RPL36AL	RPL11	PMP22			RAB31	CITED2	AIDA
MELK	GAS6		COL5A1					SRGAP2C	TFDP2					C1orf116	TRAM2	MMP14		TOX2				IDS	IDH2	CD82	TBC1D7	SGSM2		ALDH5A1		LMNB1	JUNB				CNTNAP3B	BMP5	TMC7	GRIA3	TPM1	FCGR2A	MYL6	HSP90B1	MTRNR2L8			PELI1	GAPDH	JADE2
HIST1H1B	ELL2		F2RL2					SPDYE2	TGIF2					ESRP1	C12orf75	MMP2		AQP3				IER3	IDH3A	ZYX	TFAP2A	AC110285.1		ALDH6A1		ZFP36	DUSP1				PREX2	PRICKLE1	SLCO1A2	PTPRD	SEMA5A	APOC2	GPRC5B	RPS25	RPL27			RERE	EGR1	PPARA
RAD51	VEGFA		C16orf45					LSM12	TLE1					RAB38	ARHGEF19	MMP3		IL11				IGFBP1	IDH3B	P4HA2	HACD3	SHTN1		ALDH7A1		TSC22D3	PDE4B				SERPINI2	ERRFI1	PDE1C	SRRM3	RAPH1	HIF1A	CD63	PRNP	SCRG1			ARHGAP15	SLC16A3	EXOC1
PRC1	RND3		C15orf52					CKB	TRIP13					DNAJA4	EPHA2	MMP9		SERPINE1				IGFBP3	IDH3G	PEA15	SNCA	RBMS3		ALDH9A1		SLC25A33	PPP1CC				PRKG1	TIMP3	SYNJ2	RBFOX3	CCDC3	ATP1B3	GOLGA7	EIF1	VIM			SH3BP5	BTG2	SEC14L1
CDC45	UAP1		C12orf75					SPDYE2B	VGLL1					FAM174B	SOX11	NAP1L4		NGFR				IL6	IMMT	GLRX2	GNPTAB	PARVB		ALKBH1		GEM	LM				PTCHD1-AS	C1R	HAPLN2	GALNT17	MYOF	ARPC2	APP	SRP14	RPS13			CASS4	MYDGF	FCHSD2
GMNN	SPDL1		CD163L1					ADAMTS9	VGLL4					SSUH2	RRM2	NRG1						ILVBL	ISCA1	HAPLN3	DNAJA4	CPEB3		ALKBH3		DUSP5	ZYX				DPP10-AS3	ISLR	CLMN	PCDH9	PLCE1	RNASE1	SGK1	ARL6IP1	GJB6			PER1	ACTB	SEC11A
DTYMK	RASA1		CAV1					ECE1	WDHD1					SERPINF1	IL11	PAPPA						INHA	ISCU	RAB36	APOE	PDZD2		ALKBH7		CITED2	DDX5				LINC00511	ARHGAP29	SLC5A11	SPTBN4	ARHGAP6	HSP90B1	PMP22	TCEAL4	ITM2C			CDC42SE2	PIM1	PSME4
RACGAP1	ECE1		CARD10					EHD2	WWTR1					IL12RB2	CARHSP1	PECAM1						IRS2	LDHA	SOD2	MTMR2	PAG1		AMACR		HILPDA	ARID5A				ARHGEF26-AS1	ABCA6	AGAP1	MTUS2	PAPSS2	ARHGDIB	CALM1	CRYAB	FOS			EPB41L3	CD69	ANAPC16
GINS2	FAM129B		CLCF1					METTL7B	YBX1					KREMEN2	PLK1	PGF						ISG20	LDHB	ESYT2	ATP6V1B2	LONP2		AMT		CHD7	TRA2B				GNA14	TIMP1	COBL	CAMK2B	GRK5	KLF6	LAMP2	IDS	ITM2B			SBF2	OLFML3	ARMH4
CENPK	LAMC1		CDH13					NBPF11	YEATS2					HSPA2	HOMER3	PIGF						JMJD6	LRPPRC	IL18BP	VPS35L	CDH4		ANGEL2		DUSP2	EIF1				ITGA7	EGFR	2023-03-01	PCDH7	AC007319.1	TMSB10	PAQR6	OLFM1	MAT2A			KIF16B	SQSTM1	USP33
NCAPG2	ARL4C		BMP2					BRD4	ZBTB5					FCN3	SEMA6C	PLAT						JUN	MAOB	FGFRL1	EXOSC4	ABCA5		APEX2		ARRDC3	PER1				SLC39A12	ZIC1	LINC00639	ELMOD1	NRP1	EGR2	CCL4L2	NEDD8	CALM1			DAB2	AC012447.1	SGMS1
KIF4A	TGFBR2		AXL					LOXL2	ZIC1					QPRT	CDC20	PLAU						KDELR3	MDH1	PLEC	STAM	SLC39A11		APOA1BP		SUB1	LITAF				AQP4-AS1	ITGA10	EFHD1	DGKG	AC017002.5	PFDN5	EGR1	DNAJA1	RPS4X			SDC3	PADI2	RDX
LMNB1	NFKBIA		ABCC3					CDK11B						RIPOR2	COL5A3	PLAUR						KDM3A	MDH2					APOO		CYTIP	ID3				CACHD1	COLEC12	HHIP	NRXN3	ZEB1	H3F3B	PRDX1	COX6B1	PEBP1			JARID2	ACTG1	SOS2
NEIL3	SEC24D		ARNTL2					SRGAP2						GALNT3	SLC2A4RG	PTBP1						KIF5A	MFN2					APOOL		STK17B	STAT3				RORB	CLMP	ANK2	GABRB3	FILIP1	CDKN1A	RPL24	NSF	PTPLAD1			CD86	DHRS7	IL18
DHFR	SP100		ANTXR2					CRABP2						ZNF280A	CLCF1	PTGER2						KLF6	MGST3					APOPT1		KLF2	RASSF1				CHL1	PTPRG	FRMD4B	ASIC2	LHFPL6	COX7C	DYNC1LI2	ITM2B	PSAP			ZMYM2	LIPA	TBC1D2B
EZH2	HMGA1		ANXA1					PRKACA						AL512428.1	SAPCD2	PTGES						KLF7	MPC1					ARF5		PNRC1	IRF1				DOCK3	ADAM12	PTPRD	ATP2B2	LAMC3	EIF4A2	GAPDH	GAD1	COX6B1			TET2	P2RY12	CHKA
CCNB1	TRAM2		AKR1C3					SLX1A						AC009086.2	PPM1J	RPS6KA5						KLHL24	MRPL11					ARG2		CEBPB	SOCS3				GPC5-AS2	AC012409.2	CREB5	NCAM1	AC009269.2	CYBB	TMEM144	COX6A1	TPP1			SLCO2B1	GLDN	ARID4A
MXD3	CNN2		ARL4C					CLIP2						MITF	PLCB1	SCAMP4						LALBA	MRPL15					ARL2		KCTD12	MYADM				MRVI1	MAMDC2	LINC00320	ROBO2	COL6A2	CXCR4	TCEAL4	GABRA1	EEF1A1			LRMDA	PLIN2	DOCK5
NUDT1	PVR							EGR3						MCOLN3	KCNN2	SELPLG						LARGE1	MRPL34					ARMC10		PLAUR	ATF3				NCAN	YAP1	NCAM1	GABBR2	VCL	KCTD12	HNRNPA1	ACTG1	SLC4A4			HLA-DQB2	LPL	GANC
SHCBP1	BCAR3							SLX1B						CUBN	MAPK8IP1	SEMA3F						LDHA	MRPL35					ARMS2		TRIB1	ODC1				ADGRA3	KCNK2	ARHGAP23	CSMD2	ARHGEF17	HERPUD1	RPL15	COX5A	RPL35A			PRKCE	CLIC1	SLA
ESCO2	IRS1							BOLA2-SMG1P6						TIMM50	C16orf45	SERPINB4						LDHC	MRPS11					ASAH2		C5AR1	SLC41A1				CACNB2	HSPG2	CDH20	RIMS1	ZBTB46	FPR1	SCD5	PEBP1	RANBP3L			TRPS1	ADGRE2	MIS18BP1
WDR34	FSTL3							NPIPB11						AHCYL2	SYTL5	SERPINE1						LOX	MRPS12					ATAD1		FOSL2	ACTG1				CNN3	COL12A1	NPAS3	NMNAT2	MAP3K20	RPL26	CCL3	YWHAG	COX7B			MS4A4E	TUBA1B	SIGLEC8
DEK	SIPA1L3							PAGE2B						HSPB2	TUBB2B	SERPINE2						LXN	MRPS15					ATAD3A		PLEK	TIPARP				BBOX1	ITGBL1	ST6GALNAC3	CTNNA2	CLTCL1	CCL4	TPT1	MALAT1	SLC1A2			PPM1B	CCL3	SLC38A9
BRCA1	ENG							SMN1						CHCHD6	SORCS2	SPP1						MAFF	MRPS22					ATAD3B		EMD	MIDN				TNC	COL7A1	ANLN	DPP10	CRISPLD2	CLEC7A	SEPP1	DKK3	CNN3			SLA	TMEM107	TMEM161B-AS1
BUB1	MAP4K4							DLGAP4						PIR	MMP3	SPX						MAP3K1	MRPS30					ATIC		FTL	JUN				PCDH9	ZBTB46	CTTNBP2	CELF4	ST5	LGMN	SOD1	NDUFS5	SRP14			MBNL2	HSPE1	TMCC1
NSD2	DOCK5							ZBTB7A						CABLES1	KLF4	TIMP2						MIF	MTRF1					ATP10D		HIVEP2	MT1G				AC099792.1	COL8A1	SILC1	UNC79	PDE5A	ATP6V1B2	RPL19	FTH1	UBC			COP1	PDIA6	TERF2IP
PTTG1	GALNT10							CHERP						HSPB2-C11orf52	SPEG	TNF						MT1E	MTRR					ATP5A1		BHLHE40	CCNL1				ADGRG1	NR2F2	ERBIN	CACNA1D	PTEN	HAVCR2	STMN1	SYNPR	BAALC			AAK1	CSTB	DCAF6
MCM2	IL6ST							PRR12						DAAM2	LYPD6	TNFRSF10C						MT2A	MTX2					ATP5B		NFKBIZ	RHOB				AL022068.1	CCDC80	AL033523.1	LINC00632	FAT1	LCP1	FGF1	CNR1	EZR			MYO5A	TUBB	SAMD9L
TMEM106C	TPM4							SH3PXD2B						ABCG5	KRT81	TNFRSF11B						MXI1	NDUFA1					ATP5C1		CCRL2	MYD88				ANKFN1	AKAP12	SCD5	CACNA1E	S1PR3	GNA13	HTRA1	ATP5H	TMEM66			SAMSN1	FCGBP	DEK
SKA3	ATP2B1							BRSK1						ADCY1	FZD2	TNFRSF1A						MYH9	NDUFA2					ATP5D		ADRB2	EGR2				MED12L	ANKH	PACS2	DLGAP2	SLC30A10	SRSF2	COX6A1	CHN1	PRDX6			SLC1A3	PFN1	PIAS1
RRM1	FUT8							NBPF12						SMCO3	EDN3	TNFRSF1B						NAGK	NDUFA3					ATP5E		KLF10	NR4A1				FAM184A	C1S	AK5	GRIA4	NEURL1B	BHLHE41	ZEB2	RPS8	ATP5A1			IL6ST	CD68	HERC4
POLQ	TNIP1							COL5A3						TFAP2A	PALM	TUBGCP2						NCAN	NDUFA4					ATP5F1		NLRP3	TAGLN2				EYA2	IGFBP5	LIMCH1	CHD5	HIP1	ATF4	UBL5	EEF1A1	EIF1			CXCR4	CALM1	ARHGEF6
FBXO5	SPATS2L							CSAG3						RNF43	KCNG1	VEGFA						NDRG1	NDUFA5					ATP5G1		SLC3A2	DJB1				CPE	PTPRM	DPYSL5	TENM2	ADAMTS2	RPL36AL	GNAS	ENO2	SCD5			SSH2	FCGR1B	SSH1
KIF22	JUN							CAMK2N1						MLPH	NEGR1	VEGFC						NDST1	NDUFA6					ATP5G2		MARCKSL1	ZC3H12A				BAALC	IGFBP4	GNG7	CCSER1	ECE1	RGS2	SNHG8	GNG3	RPL15			FRMD4B	TUBA1C	TENM4
CENPP	SMAD3							TUBG2						CLTRN	SEMA3D	VGF						NDST2	NDUFA7					ATP5G3		VPS37B	USP2				RGR	SLC16A12	GPM6B	SNAP25-AS1	MSRB3	EIF4G2	MAP4K4	RPS14	LAPTM4A			TEX30	OSM	AC093849.4
SLC25A5	RBCK1							POTEJ						FAM189A2	DACT3	WNT16						NEDD4L	NDUFA8					ATP5H		TNFAIP3	TNFAIP6				LINC02649	ITGA11	DLG2	DOCK3	COL1A1	ANXA5	HIPK2	RPL24	GLUD2			GRK3	ODC1	RAB12
TMPO	CD151							RASA4B						PLXNC1	TMEM158	WNT2						NFIL3	NDUFA9					ATP5I		CGGBP1	NPPC				TGFB2	PARD3B	SEPTIN7	DLG2	OSMR	CTSB	TUBA1B	MYL6	RHOB			LYVE1	LILRA2	PPM1B
BRCA2	NET1							CDK11A						SLC30A2	TIMP4							NOCT	NDUFAB1					ATP5J		PTP4A1	H3-3B				AL137139.2	RARB	NALCN	AC092691.1	PALM2-AKAP2	MSR1	YWHAQ	UBC	RPL11			TBC1D14	SNHG12	FAM117B
ANLN	RTN4							TRABD2A						CARMIL1	TGFA							NR3C1	NDUFB1					ATP5J2		NFKBID	ERF				SOX9	ADAMTS2	MTUS1	KHDRBS3	PDLIM5	IFNGR1	CNDP1	NDUFA4	PRNP			N4BP2L2	IPCEF1	N4BP2L2
TPI1	ASPH							CXCL1						HACD1	FAM83D							P4HA1	NDUFB2					ATP5J2-PTCD1		CD86	PHLDA1				ITM2C	SPARC	NFASC	NXPH1	LINC00924	IL1A	UBC	EIF4G2	ASPH			CCDC26	CTSB	FBH1
PPIA	UBE2E3							ADAM19						STRIP2	ADGRB1							P4HA2	NDUFB3					ATP5L		SPAG9	JUND				ACOT11	USP53	AC079352.1	BRINP3	ACTA2	RPL24	EDIL3	ATP5O	S100A1			FAM49A	MMD	SERPING1
SGO2	E2F7							TBC1D3H						RASSF3	PDLIM2							PAM	NDUFB4					ATP5O		NDEL1	TRA2A				MIR99AHG	ARHGAP10	CA2	LINC00461	PMEPA1	RPS29	GABARAP	ALDOC	SLC25A5			MS4A4A	NFKBIA	NT5C2
SMC4	SDC4							CLIP3						MYO5A	PALM2							PCK1	NDUFB5					ATP5S		GADD45B	TPPP3				SLC1A3	PID1	CCDC88A	NBEA	PEAK1	RGS10	GABARAPL2	RPS12	GABARAPL2			SUSD6	GPNMB	ATAD2
CCDC34	DRAP1							PRR11						LYST	EML1							PDGFB	NDUFB6					ATP5SL		MAT2A	IER2				APLNR	KCNT2	QDPR	GRIN2A	MYL9	SMAP2	CCL2	NDUFB9	PLEKHB1			MAP3K8	BCAP31	RNF115
DEPDC1	NR2F2							PMEPA1						MYO1D	MEOX2							PDK1	NDUFB7					ATP6		NR4A2	MCL1				NKAIN3	JCAD	SH3GL3	ADCY2	FSTL1	NFKBIA	WNK1	PREPL	HSP90AB1			SPTLC3	RPS2	TFEC
RNASEH2A	ANKRD13A							TCAF1						CHADL	KCNN4							PDK3	NDUFB8					ATP8		DUSP1					LIFR	FRMD6	COL4A5	SCN8A	PDE8B	P2RY13	RPL34	PEG3	ACTG1			HLA-DQA1	IGSF6	HSD17B4
MYBL2	PDLIM7							HOXB5						FMN1	CDCA5							PFKFB3	NDUFC1					ATPAF1		DDX5					FIGN	AC026316.5	DOCK1	SEZ6L	IGFBP4	RTN4	NDUFB9	PPIA	DDX17			DENND1A	CX3CR1	OSBPL11
PBK	CITED2							GDNF						ROPN1B	LOX							PFKL	NDUFC2					ATPAF2		LITAF					COL5A3	GFPT2	AL359091.1	CAMK2A	LAMA2	ACTG1	ATP5E	TAC3	NCAN			GPR155	TPRG1	CREBL2
TUBB4B	CYLD							GEM						RAB27A	MSRB3							PFKP	NDUFS1					ATPIF1		UBALD2					WLS	AUTS2	CDH19	JPH4	TMTC1	ID2	DNAJA1	RHOA	STOM			JAK2	NOP10	IL10RA
KIF20A	PVRL2							CSAG2						MET	OSR2							PGAM2	NDUFS2					ATXN2		TRA2B					AC093610.1	LINC00924	ATP10B	CELF5	ADAMTS9	HSPH1	NDRG2	SCG5	ARL6IP1			SERPING1	PLEK	GCLC
FOXM1	RASA3							SLC6A6						SLC18B1	COL1A2							PGF	NDUFS3					AUH		PER1					NAT8L	LIMA1	MEGF10	KCNQ2	LAMB1	GLUL	CNP	BEX4	PTGDS			SUMF1	OLR1	ALOX15B
ITGB3BP	PLCB3							CRLF1						UBL3	BRSK1							PGK1	NDUFS4					AURKAIP1		EIF1					PHYHD1	ITGA1	PHLDB1	AKAP6	CDH11	RN5-8S1	ACTG1	CAMK2N1	PMP2			SSBP2	ITGB2	XPO6
PTMA	RAPH1							L1CAM						ATP10A	CORO2A							PGM1	NDUFS6					BAD		ETV3					SLC7A11	TFPI	NTM	NTRK2	LAMC1	S100A11	PEBP1	TERF2IP	RPS8			ZFAND3	SIGLEC9	DCP2
ATAD2	PLK2							ANGPTL4						TTN	ARC							PGM2	NDUFS7					BAK1		ARID5A					AC234582.1	PRRX1	DIP2B	PCLO	AC092957.1	RPL15	CAMK2N1	CPE	CXCL14			MT-ND1	CD63	ENTPD1-AS1
COX8A	FEZ2							MAGEA1						SNCA	TNFAIP2							PHKG1	NDUFS8					BAX		GTF2B					AGT	CPED1	MAP4K4	SRRM4	CYP7B1	SAMSN1	RPS3A	UBL5	PSAT1			IFIT3	RPL22L1	ANKRD44
CHEK1	FTSJ3							SOX9						GMPR	COL12A1							PIM1	NDUFV1					BCAT2		SOCS3					NWD1	S1PR3	ARFGEF3	NTRK3	PTPRK	FCGR3A	H3F3B	NREP	AGT			FHIT	Z93241.1	ACYP2
MCM4	TAP1							RGPD8						FKBP11	HOXB9							PKLR	NDUFV2					BCKDHA		RGS2					ADGRV1	LAMA2	ST18	KCNIP4	PRKG1	NR4A3	CD9	SPOCK1	SLC39A12			SELENOP	SPP1	NHSL1
CIP2A	PMAIP1							PDLIM1						PRAME	SV2A							PKP1	NNT					BCKDHB		ODC1					DTNA	COL1A2	CTNNA3	CSMD1	CALD1	TPT1	PLP1	SNAP25	SPARCL1	LCN2	LCN2	MRC1	HSPA1A	TRIM5
SPC24	PARP3							SETD1B						SGCD	SULT1E1							PLAC8	NQO2					BCKDK		JUN					BMP7	SYNPO2	TJP1	MEG8	SETBP1	SAT1	MBP	RN45S	RN45S	STEAP4	IFI202B	GBP4	NFKBIZ	AC020611.2
YEATS4	ELK3							SPHK1						CA5B	CDT1							PLAUR	OAT					BCL2		JMJD1C					CFAP47	ADGRD1	LINC01170	DCLK1	TEAD1	CREG1	PEA15	YWHAB	GABARAP			MT-ATP6	ENO1	SMARCA2
HIST1H2AJ	MYL6							NOTCH2NLA						LZTS1	MMP15							PLIN2	OGDH					BCL2L1		MT1G					ACSS3	SLC7A14-AS1	ANKS1B	ANKRD30BL	PARD3B	TMBIM6	HSP90B1	DSTN	EIF4A2			TLR2	SLC25A5	CUL5
RPA3	TFE3							G0S2						INPP4B	COL9A3							PNRC1	OPA1					BCL2L13		TIPARP					PDLIM3	PLEKHG1	LANCL1	GRIK3	HEYL	RHOB	RTN3	SST	CDR1			ZBTB20	OTUD1	CD47
HELLS	PDLIM5							LCN2						ATAD3B								PPARGC1A	OXA1L					BCL2L2		RHOB					MEIS2	PDGFRB	PTCSC3	NOL4	FARP1	SNHG8	ATP5B	DNER	ATP5J			HLA-DQA2	ALDOA	LONP2
POC1A	LASP1							KDM6B						DUSP10								PPFIA4	PDHA1					BCS1L		PLK2					ABLIM1	PLCB4	AP002370.2	TAFA5	RARB	EPB41L2	COX7B	RPL36AL	MYL6			PIAS1	HSP90B1	C20orf194
LIG1	HSPA5							MAGEA2B						CLYBL								PPP1R15A	PDHB					BDH1		BP1					MACF1	NTRK3	TMEM165	AC016042.1	DOCK6	GPR34	MAT2A	SKP1	CANX			LRRK2	LINC01736	RBM26
RFC4	EFHD2							TBC1D3F						PLEKHH1								PPP1R3C	PDHX					BID		ZNF622					FGFR1	FKBP10	PLCL1	DNM1	ACTN1	PSAP	SAP18	BEX5	UBL5			KMT2C	OTOA	CERS6
H2AFX	NR3C1							FOSL1						GCNT2								PRDX5	PDK4					BLOC1S1		H3-3B					PTGDS	LUM	SAMD12	SLC44A5	AGAP1	YWHAZ	RPLP2	APLP2	RAB7A			BAZ2B	ATP5MC3	ORC2
FABP5	KLF10							BCL3						BTN2A2								PRKCA	PDP1					BNIP3		METRNL					ID3	KANK2	PLA2G4C	NLGN4X	THSD7B	CCNH	RPL37	DPYSL2	EIF4G2			SMAP2	SLC11A1	YIPF4
NCAPD3	ITGB1							RASA4						NUDT8								PYGM	PHB2					BNIP3L		ZC3H12A					LINC01748	LINC02208	DST	LINC00599	COL6A1	NCL	PIP4K2A	FXYD6	GATM			ATG7	NEU1	AC120193.1
AURKA	SOCS5							TBC1D3L						SLC19A2								RBPJ	PHYH					BOLA1		DJB1					LRP1B	ADAM22	SEC14L5	AC110296.1	AL353586.1	DUSP6	PPIA	RAB3C	PCDHGC3			ARID1B	PDIA3	NUDT5
LRR1	EXT1							CNOT3						HPS4								RORA	PMPCA					BOLA3		TRA2A					DNAH7	GHR	RHOU	ANKS1B	LZTS1-AS1	UBB	HSD17B4	GRIA2	SLC1A4			RCAN1	DBI	BTN3A1
CDC6	PNPLA2							FOSL2						CLCN7								RRAGD	POLR2F					BPHL		PHLDA1					DNER	FBXL7	TMEM235	LUZP2	ITGA7	HTRA1	MARCKSL1	GPM6B	HSP90B1			BCAS3	SOCS6	KCNMA1-AS1
SAC3D1	LAMB2							SP2						C11orf96								S100A4	POR					C10orf10		HERPUD1					BRINP1	FLVCR2	PKP4	KCNMB2	AC008250.1	NPC2	CCNI	BLCAP	MGST1			WDR70	IER5L	RETREG3
BUB1B	KANK2							CRIM1						NANOS1								SAP30	PRDX3					C10orf2		COQ10B					KANK1	TSPAN9	LANCL1-AS1	DGKB	MYLK	DHRS9	EID1	GABARAP	SYT11			USP15	SLC25A19	DRAM2
CDCA7	GNAI2							POTEF						MOK								SCARB1	RETSAT					C12orf10		UBB					MAPK10	MYOF	PROX1	SYT16	EGFLAM	SLC25A3	CAPN3	SEC61G	NACA			TTYH3	LAT2	SLC25A36
DNAJC9	HDGF							CADM1						MYO10								SDC2	RHOT1					C12orf65		UBE2S					AC073050.1	SH3D19	SLC7A14-AS1	SYN3	TSPAN9	TPM3	UQCRH	MLLT11	RPS25			SMCHD1	ZYX	AC023051.1
TTK	SLC38A2							GATD3A						MFSD12								SDC3	RHOT2					C14orf159		BTG2					GALNT15	CGNL1	SRCIN1	PCSK2	ADAMTS14	ATP5B	PCDH9	NDRG4	CHRDL1			NCOA4	SRSF7	SFMBT1
THSD4-AS1	ODF2							CBX2						LYPD8								SDC4	SDHA					C14orf2		IER5					YAP1	CRISPLD2	RAPGEF5	CDH10	VSTM4	PTMA	HINT1	ATP1A1	NGRN			ELL2	KLF4	PAPOLA
NDC80	EHBP1L1							EPHA1						FBXO7								SELENBP1	SDHB					C15orf40		SRSF2					DKK3	LAMC1	PCDH9-AS2	SPOCK1	YAP1	HNRNPA1	ITM2B	TMSB10	SERINC1			IFI27	BHLHE41	AOAH
SNRNP25	SLC16A1							IL11						IGSF8								SERPINE1	SDHC					C15orf48		EGR1					MIR4300HG	LINC01482	AL589787.1	KCTD16	CYTOR	ELL2	ATP1B1	RPL26	ATP5E			AXL	TNFRSF12A	TUT4
CARHSP1	MLTK							SYTL5						TM7SF3								SIAH2	SDHD					C15orf61		SDE2					AL160272.1	FOXP2	DOCK3	CNKSR2	ADGRL2	TYROBP	FOSB	SLC1A3	TUBA1A			IRS2	CD83	TRAPPC11
ACTB	TMSB10							TLE3						SLC7A5								SLC25A1	SLC25A11					C16orf91		MAFK					SOX5	ST5	AC110285.1	SORBS1	MEF2C	PLXDC2	GPM6A	NAP1L5	LRIG1			TUT7	CKLF	CALCOCO2
ECT2	MCFD2							USP36						RENBP								SLC2A1	SLC25A12					C17orf89		RGS1					C1orf61	OSMR	GRID1	NCAM2	AC068491.2	ELF1	SRP14	REEP5	B2M			ROCK1	RAN	GMDS-DT
KPNA2	PML							SNAI1						AFF3								SLC2A3	SLC25A20					C19orf52		UBC					ERBB4	AC097528.1	DLC1	PTPRT	ANGPT1	IL6ST	CSRP1	ATPIF1	RPS14			LINC01374	YBX1	TRPC4AP
CBX5	MYH9							SULT1A4						SLC25A4								SLC2A5	SLC25A3					C19orf70		KDM6B					NCAM1	CARMN	PTK2	KAZN	SLC6A1	NR4A2	RPSAP58	PGAM1	DAD1			CREBRF	PTCH2	ADAMTS10
PHF19	PLIN3							ZNF536						C19orf71								SLC37A4	SLC25A4					C1QBP		DDIT3					SLC44A3	SERPINE1	ENO4	KCNMA1	GGT5	C5AR1	PAIP2B	SLC6A1	NDUFB9			PAN3	ATP6V0C	AL078590.2
KIF20B	SYDE1							CBSL						HOGA1								SLC6A6	SLC25A5					C20orf24		JUNB					CDC42EP4	RNF220	CLASP2	DGKI	PRRX1	RPL37	RAC1	RAN	NCL			SESN1	PNP	VOPP1
VRK1	OXSR1							LRRC37A						CYP27A1								SRPX	SLC25A6					C21orf33		NFE2L2					FGF1	EXT1	AC009063.2	HSPA12A	SH3RF1	SORL1	ATP5J	PAIP2	UQCRH			WWP1	RNASET2	WDR81
BCL2L12	SHISA5							KLF5						TRIM2								STBD1	SUCLA2					C2orf47		HEXIM1					DPYSL3	LRP1	SLCO3A1	ADD2	AC022126.1	SDCBP	HNRNPA2B1	APOD	NRCAM			ELF1	FOS	UNC13B
PFN1	PPP4R1							RGPD6						DNAJB7								STC1	SUCLG1					C2orf69		SPTY2D1					SYNM	WWTR1	COLGALT2	PPP1R9A	MAGI1	RAB1A	C13orf15	MAP2	MYEOV2			FGD4	KLF6	CREBRF
HNRNPA2B1	NOTCH2							DACT3						TTYH2								STC2	SUPV3L1					C3orf33		TUBA1C					EMX2OS	CYP7B1	AL355835.1	FHOD3	TAGLN	SELK	TMBIM6	VIP	APC			PTPRJ	ANXA2	ARL5A
ACOT7	TOR1B							NLGN2						CCL28								SULT2B1	SURF1					C5orf63		LM					BAALC-AS1	TNS2	AC012494.1	KIAA1217	CLMN	GABARAP	ANKRD40	EGR1	COX6A1			HLA-DPB1	SNCA	RNF13
DDX39A	RPL23AP79							MAGEA10						GPRC5B								TES	TCIRG1					C6orf136		CREM					CFAP54	KCNIP1	ERBB4	FRMPD4	ZIC1	FKBP5	TTLL7	MYL12B	COX4I1			FTX	NME1	OGA
NCAPD2	SPIN1							CCZ1B						SDCBP								TGFB3	TIMM10					C6orf203		PDE4B					ADCY8	FGD6	SLC7A14	OSBPL6	LINC01060	MYL12B	ATP5I	MORF4L2	HSPA5			PHACTR1	WDR74	AC010210.1
HIRIP3	SRF							ARHGAP23						OSTM1								TGFBI	TIMM13					C6orf57		RAB7B					TENM4	NBL1	ADGRB3	CABP1	FAM162B	DDX3X	RPL39	GAD2	EID1			PLAAT4	CFL1	RHOT1
MCM10	PSME1							SPRED3						SPSB1								TGM2	TIMM17A					C7orf55		TMED5					BCL6	COBLL1	LSAMP	SCN9A	ARHGEF12	CREM	C14orf2	NTRK2	GRAMD3			MPEG1	SYNGR2	HGSNAT
CDK2	VASP							GTF2H2C						HES6								TIPARP	TIMM50					C8orf82		SLC25A20					PLEKHA7	TEAD1	GAB1	LRFN5	PLEKHG2	CTSL1	ANLN	NCL	RPS20			TNFAIP2	DNASE2	NAALADL2
RBBP8	FCF1							F8A3						TMEM117								TKTL1	TIMM8B					CA5A		RASGEF1B					RHPN2	CXCL12	APBB2	MAGI2	KCNT2	RAP1A	COX6C	YWHAQ	RPS24			EXOC4	SCAMP2	ALOX12-AS1
IFI27L1								NRGN						PAG1								TMEM45A	TIMM9					CA5B		TAF7					DAAM1	FBLIM1	SH3TC2	HECW1	LINC02664	SRSF5	CSDE1	MATR3	APOD			PCNX1	NDUFB9	HMGN3
MTFR2								TBC1D3D						SCARB1								TNFAIP3	TOMM22					CARKD		ATF3					SLC35F1	PDLIM7	JAM3	NEBL	KANK2	DDX17	ARHGAP21	PTPLAD1	DST			PREX1	FTL	TM9SF2
MIS18BP1								AHDC1						PLEKHA5								TPBG	TOMM70					CARS2		STAT3					SLC9C2	LTBP1	RNF144A	KCNC2	GUCY1A1	EIF4A3	DDX17	LDHA	NDUFA1			ZDHHC14	HPGDS	TRIM56
SKA1								BCL9L						CLCN5								TPD52	UQCR10					CASP8		REL					LIX1	VCL	GRM3	ANK2	CACNA1H	HSPA5	TMEM66	PRKACB	PFDN5			PSD3	CD99	SECISBP2L
CDCA4								U2AF1L5						ASAH1								TPI1	UQCR11					CAT		SPP1					GPRC5B	PAPSS2	LPAR1	TSPAN7	PAWR	HNRNPA2B1	BEX2	FOS	PREX2			CD163L1	RFX2	KMO
USP1								NTSR1						GSTP1								TPST2	UQCRB					CBR3		ACTG1					FGF2	MEG8	SORT1	KSR2	TNS3	ZFP36	YWHAZ	ATP6V1B2	RTN3			AC100849.1	IL6	LINC02245
STIL								GTF2IRD2B						TRMT12								UGP2	UQCRC1					CBR4		RILPL2					APC	MYO1B	LDB3	KCNJ3	RGS5	CALM2	NDRG1	PAR5	RTN4			CXCL12	TMED9	HEXA
ATAD5								U2AF1						DNAJC1								VEGFA	UQCRC2					CCBL2		CD69					THSD7A	TRABD2B	FBXL7	LINGO2	IGFBP2	YWHAE	IDI1	PPA1	GPR37L1			FGL2	SERPINF1	CIR1
RPL39L								S100A2						STAT5A								VHL	UQCRFS1					CCDC109B		CD14					ETNPPL	RBMS3-AS2	MYO6	GABRB1	TBX18	VMP1	DDX5	ATP6V1E1	C14orf2			TNFRSF21	P4HB	SOS1
PARPBP								TBC1D3E						PFKFB2								VLDLR	UQCRH					CCDC127		RRAD					PLEKHA5	BX322234.1	LINC01470	LRFN2	PPFIBP1	PLAUR	EIF4G2	UQCRC2	FGFR2			IFI44L	SDF2L1	CYREN
DSCC1								ASS1						PARVB								WSB1	UQCRQ					CCDC51		GPR171					SFXN5	SULF1	AL133304.3	HCN1	GUCY1B1	SRGAP2P2	TOMM7	PHYHIPL	HRSP12			CIITA	TAF10	SH3PXD2B
TUBG1								TBC1D3K						TNFRSF14								XPNPEP1	VDAC1					CCDC58		NR4A3					EMP1	CCN2	NLGN1	TMEM178B	CSPG4	MRFAP1	PPA1	NDUFB2	SLC6A1			AC012368.1	CEBPA	GPBP1L1
HLA-DRA								SERF1A						STX3								ZFP36	VDAC2					CCDC90B		MXD1					ANK2	TBX15	PHACTR3	ADAM23	SPARCL1	PLEK	NDUFB2	KLC1	C10orf58			USP9X	AC239799.2	EFR3A
MAD2L2								ATAD3C						SAMM50								ZNF292	VDAC3					CCT7		PRDX6					CRB1	MRVI1	AC096564.1	EPHA6	CPM	OGFRL1	SCRG1	UQCRHL	FEZ1			FAM13A	SSPN	WASHC4
KIF18B								CTAG1A						AIF1L														CDC25C		EGR2					ADGRL3	CCN1	CPOX	RIMBP2	SVIL	RANBP2	COX6B1	PJA2	PCDH9			TCF4	PLK3	LARP4
RFC5								RGPD2						LNX2														CECR5		NR4A1					PDZRN3	PIEZO2	CLDND1	CACNA2D3	ASAP1	LHFPL2	MAP4	VDAC1	RPS12			CADM1	ATP6V0B	TMEM140
RAD51C								NPIPB2						FAH														CEP89		CLK1					ATOH8	AC087477.2	PLLP	KHDRBS2	TACC1	CAP1	TJP1	SLC25A3	CADM1			FNDC3A	GAL3ST4	AKAP7
TTF2								LRRC37A3						RRAGD														CHCHD1		CCNL1					AGBL4	NAA11	RTN4	NELL1	EDIL3	MYL12A	HSPE1	HNRNPA1	PARK7			SH2B3	BRI3	PRKD3
SKA2								SPDYE5						VAT1														CHCHD10		ARF4					CADPS	VCAN	PPM1H	CNTN5	LINC01197	SF3B1	SRGN	PARK7	SOX2-OT			EPB41L2	PGK1	FIG4
CFL1								RGPD3						B3GLCT														CHCHD2		HCAR2					AC022601.1	COL16A1	AGPAT4	DMD	GEM	HSPD1	SPARCL1	VDAC3	HADHB			EVI5	PMAIP1	KLHL8
RUVBL2								DOCK6						WDR81														CHCHD3		HCAR3					BOC	ATP10D	GNAO1	DTNA	NHSL2	GAPDH	SPTBN1	RAB6A	TUBA1B			USP4	UBE2J1	ZBTB20
TFDP1								CBS						FAM207A														CHCHD4		JUND					FBXL7	WDR86	ACTN2	PPM1E	RBFOX2	WSB1	HEPN1	MYEOV2	SELK			DAGLB	FKBP1A	CDC40
UQCC2								SLC4A3						DERA														CHCHD5		TSC22D2					EFEMP1	CLDN11	FAM222A-AS1	PDE8B	SYNPO2	RPL39	TMEFF2	NDUFA12	PLP1			DOCK2	FCER1G	RFX3
SAE1								SPDYE1																				CHCHD6		BCL2L11					SORCS2	SAMD5	ABCA8	CDH12	PIEZO2	PICALM	DAAM2	CANX	TP53BP2			BBX	PCBP1	ANKUB1
MCM5								EHD3																				CHCHD7		IER2					SLC7A2	MAMDC2-AS1	OSBPL1A	GRIK5	RBMS3-AS2	ZNF207	SLCO1A2	GABRG2	ACAA2			FAM53B	RAB5IF	PDE5A
FANCG								CCL2																				CHDH		MCL1					GAREM1	RBFOX2	KCTD8	ARHGEF4	C2CD2	GNB2L1	HNRNPH3	SERPINI1	C15orf24			TBC1D22A	DNAJA1	MR1
HADH								RGS2																				CHPT1		PLK3					GPR37L1	ACSS3	FMNL2	GRIN1	GPC6	HLA-DRB1	DNAJB1	SOX2-OT	ATP5J2			SYAP1	LPAR5	LINC00623
PLK4								MAST3																				CISD1							CDH20	SEC24D	TMEM63A	NOVA1	VGLL3	DAZAP2	SH3GL3	MAP1LC3B	OST4			PARP14	XBP1	CIRBP
PIMREG								CEP131																				CISD2							PLPP3	PARVA	LINC02821	ARPP21	PEAR1	LPCAT2	PTN	DDX17	CHN1			ZBTB16	AL021155.5	PDE4DIP
CDKN2C								PTGS2																				CISD3							FAT3	TRAM2	CDC14B	FAM135B	FERMT2	PTPRC	CANX	ATP5I	PAQR8			TRIM22	BHLHE40	NIPBL
TIMELESS								TGFA																				CKMT1A							AL390783.1	PKP2	ERBB3	STXBP1	DUXAP8	TLR2	C11orf10	RPS16	TIMP3			DIAPH2	CNBP	ZNF846
ANP32B								FAM72C																				CKMT1B							KREMEN1	DOCK6	MAPT	EPB41L4B	TPM2	NPM1	KIF5B	KIT	TMOD2			SPIDR	GSDME	PMS1
TEX30								FAM72D																				CKMT2							PARD3	PTK7	GPRC5B	SHANK2	AL024474.2	SRGAP2	C1orf61	HBXIP	BBS2			DIP2B	ATP6AP1	SYNRG
OIP5								IKBKG																				CLIC4							LINC01727	ZFPM2	L3MBTL4	SHC3	LDB2	NOL7	SNHG5	ESD	H3F3B			MT-ND4	GADD45B	DISP1
RMI2								LIMS4																				CLPB							ALDH4A1	SASH1	KLHL4	PTPRG	ADGRA2	VSIG4	DAD1	RBX1	NOL7			LGALS3BP	CHCHD2	ZNF292
NRM								TPTE																				CLPP							CSRP1	APBB2	HPN-AS1	NRXN2	FBLN1	RNASET2	H3F3AP4	ASPH	DAZAP2			ATXN1	POLR2L	AL031587.2
DSN1								LAT																				CLPX							CDHR3	CCDC102B	AC090015.1	GABRB2	PLS3	RNASE6	PLLP	TMEM14A	NTM			SIDT1	ATP5F1B	APPL2
ARHGAP11A								COL27A1																				CLYBL							AMOT	NID2	FAM124A	LINC01322	ZEB1-AS1	CSF1R	CMC2	ISCU	MACF1			GTDC1	DDOST	RBL2
MCM3								CBWD5																				CMC1							MYLK	GLIS3	AL355881.1	FAM153CP	UBE2E2	REL	RAP1A	NDUFB8	IDI1			MRTFA	BCAS2	XRCC5
WDR76								FAM72A																				CMC2							LINC01094	CACNA1C	IGSF11	SLC35F3	PDLIM1	TPM4	BTF3	DDX5	SLC25A3			WDFY2	SPATA13	KLHDC1
TRIP13								SLC17A9																				CMC4							PBXIP1	PAPLN	LARP6	KIAA1549L	DCN	ATP5E	SLC1A2	STXBP1	CCNI			KLF9	TREM1	CCDC146
DLEU2								SLC2A14																				CMPK2							DPYSL2	DST	SPP1	KCNJ6	MOCS1	ADAM28	USMG5	NOL7	EPHX1			MS4A7	CD9	CIITA
HIST1H3B								ABLIM3																				COA1							CHI3L1	CADPS2	ADIPOR2	FAM153B	SDC2	CYFIP1	ATG3	ATP5L	HSD17B12			IRF2BP2	SUSD1	ARMC8
TPRKB								BICRA																				COA3							CADM1	LHFPL2	DAAM2	ZFR2	BMP1	RPL34	SCARB2	HNRNPA2B1	BRP44L			CHST11	SLC2A5	UVRAG
CCDC167								COL7A1																				COA4							LRAT	CACNA2D1	MICAL3	CACNG2	PTK2	OTUD1	SHFM1	PTMA	TMEM47			SLC4A7	TNFAIP8L3	AC104123.1
C19orf48								FAM156B																				COA5							DOK5	TENM4	PRIMA1	UNC13A	COL5A1	COX7B	RAB7A	PNMAL1	NDUFB2			STAG1	CD300A	A2M
MTHFD1								PCNX2																				COA6							EGF	SULF2	AC025159.1	PTPRO	FRMD4A	B4GALT1	DAZAP2	TMEFF2	SPTBN1			CREM	LINC00963	LINC00174
RANBP1								GOLGA8Q																				COA7							NFIB	OSMR-AS1	TMEFF1	ATP1A3	CDC42BPA	AIF1	TRIM2	BTF3	SOX9			LINC01480	GPR84	JAK2
YIF1B								ZNF469																				COASY							NEAT1	AEBP1	PLAAT3	FRRS1L	LINC00472	RPL14	NOL7	TOMM7	GPR98			CHD1	GPR137B	JPX
ZCRB1								NRXN2																				COMT							AC073941.1	NHSL2	FAM222A	VSNL1	FAM13C	H2AFZ	MAL	RPS20	RHOBTB3			DLEU2	EFHD2	TLR5
EXOSC8								CXCR5																				COMTD1							AHCYL1	NINL	TANC1	BRINP1	NEXN	ARPC3	NEDD8	GABRB2	ATP5C1			ANKRD12	APOE	CHFR
WDR54								FAM72B																				COQ10A							CNTNAP3	PHLDA1	TMEM258	PLXNA4	DOCK1	MS4A7	HNRPDL	MRPS21	MSMO1			HIPK2	HIST2H2AA4	STARD13
TOPBP1								RPL36A																				COQ10B							LINC00298	TNS1	NKX6-2	SYBU	RAI14	IDI1	SET	FHL1	RPL19			SFMBT2	TMEM119	XRN1
HIST1H2AI								STRA6																				COQ2							FGFR2	ADAMTS9-AS2	TTYH2	FRMD4A	MSC-AS1	CXCL16	ANXA5	NDUFB5	ESD			TOP1	EIF4A1	WDR11
JPT1								NACAD																				COQ3							PARD3B	GPC6	GALNT13	RIT2	FRY	HNRNPU	HBXIP	DNAJB1	CLDN10			ANKRD22	ENSA	TTC37
ACAT2								NPIPB6																				COQ4							TMC1	TACC1	KANK1	GALNTL6	NXN	EIF4A1	SLC38A2	NAP1L3	APLP2			ZNF609	MANF	IVD
DCTN2								PTGES																				COQ5							NAV2	ABCA10	NEO1	RYR2	TEX41	LY86	FMNL2	TAF9	PGAM1			USP24	HSPH1	PXN
E2F1								PWP2																				COQ6							CDH2	SYTL4	AC093879.1	DNAJC6	KLHL29	GABARAPL2	DST	PRDX1	HSPE1			TMCC1	CEBPB	NEK11
EBP								ALAS2																				COQ7							AC027117.2	AC108058.1	SYNDIG1	U91319.1	OLFML2B	ATP6V0E1	BTG2	SLC25A5	HOPX			TBC1D5	RPLP0	FRRS1
FAM111A								SPDYE16																				COQ9							HKDC1	GXYLT2	SLC22A23	GALNT13	ADGRD1	NCOA4	ANP32B	MAT2A	TCEAL4			ZC3HAV1	NRP2	CBR4
PPIH								NFASC																				COX1							COL27A1	SLC1A3	MAL	TTLL7	CACNA2D1	IL13RA1	CD74	SRP9	ARHGAP5			PRKAG2	TUBB2A	DECR1
HMGXB4								CHST1																				COX10							PFKFB2	DDAH1	PIEZO2	NAV3	ZFPM2	UQCRH	RPL4	H2AFZ	PPP2CB			FER	SPCS1	TTC17
ITGB1BP1								RAC2																				COX11							ATP1A2	VGLL3	LMCD1-AS1	TMEM130	SPRED1	DNAJB1	BEX1	SRSF2	PPP1R3C			IQGAP1	PSENEN	C11orf65
PSMD14								CD248																				COX14							LINC00499	BOC	SEMA3B	ICA1	TIMP3	DHRS7	RBX1	PNMA2	RPLP2			STAT1	SLC7A5	DMXL2
NUP37								OPRD1																				COX15							LTBP1	FBLN5	PRR5L	COBL	FILIP1L	CDV3	RHOU	ATP5C1	LAMP2			PAG1	OSTC	GALC
CYB5B								PER2																				COX16							LUCAT1	TTC28	AC023590.1	NETO1	AC025280.3		RPS17	TIMP2	TJP1			LDLRAD4	TPI1	GRAMD2B
MRPL13								CDR2L																				COX17							PMP2	AC092958.1	ADCY5	CNR1	CRIM1		AKT3	NDUFAB1	HSD17B4			NFIA	ATF3	HERC1
PRIM2								ANPEP																				COX18							SLCO1C1	CYP1B1-AS1	PIK3C2B	FXYD6	AC012404.1		VAMP3	CNTN1	EGR1			JMJD1C	UCP2	PPP1R21
RAD54L								SLC35F2																				COX19							ASAP3	AC124854.1	LRRC1	BAALC	FNDC3B		MAP1B	SYT11	SPON1			PPP1CB	PPT1	SLC15A2
ACTL6A								TP53I11																				COX2							PRKD1	DNAH14	TMTC4	FRMD5	GPR176		IL1B	NHP2L1	UQCRC2			MITF	EEPD1	TAFA2
NUDT21								GOLGA8O																				COX20							PLA2G5	SPRED2	ELMO1	SLIT1	MYO10		EVI2A	GLUL	SLCO1C1			C20orf194	ARPC2	MON2
XRCC1								ZSWIM9																				COX3							SMAD1	NFIA	CNP	RAB3C	ABI2		FAU	GABARAPL1				CFD	MIF	TRNAU1AP
MED30								SP140L																				COX4I1							CFI	ANXA2	LAMP2	GABRG3	LIMA1		SELK	COX7A2				RGS2	ITGAX	MAN2B1
MIS18A								ADAMTS7																				COX4I2							NCAM2	ZFHX3	LRP1B	KCNT1	ZFPM2-AS1		MYEOV2	CSTF3				ZNF189	BAG3	ARL15
NUP107								NT5E																				COX5A							AL078602.1	DDR2	GPR37	NOS1AP	TPM4		GAS5	PCP4L1				VMP1	HNRNPAB	FAM214A
SMC1A								DEFA1																				COX5B							GNA14-AS1	PLAGL1	CAPN3	GABRG2	ITGA11		NGFRAP1	SCG3				RNF144B	MGST3	CTTNBP2NL
TPGS2								AQP9																				COX6A1							FUT9	FHL1	ATP8A1	CSRNP3	AC113383.1			HSPD1				EXOC6B	PRDX1	CARD8
MZT1								DEFA3																				COX6A2							FRMPD2	PHLDB2	LRRC63	AC090578.1	CACNB2			RPS4Y1				KLF7	MYL6	WIPF1
E2F8								MMP1																				COX6B1							KCNMB2-AS1	NOX4	MVB12B	CLVS2	PDE4D			CSDE1				CPEB3	SLC39A1	PHF3
MRPS11								PPBP																				COX6B2							PLXNA2	NEBL	KIF6	EPHB1	SORBS2			C1orf61				CNTRL	ARF6	NIN
TMEM14A								UBE2Q2L																				COX6C							ADGRB3	FAM114A1	DMD	DGCR9	ADCY6			RGS2				PIK3R5	CYC1	FAM111A
MAPRE1								NEFL																				COX7A1							KALRN	ABCA8	SOX10	DNM3	TANC1			SERINC3				FOXN2	ZNF267	CREG1
ZNF367								ANKRD36B																				COX7A2							COLEC12	SPARCL1	CTNND2	MAPT	AC025180.1							CENPP	LINC01010	ZNRF2
INCENP								RGS16																				COX7A2L							IQCA1	ARHGAP42	SEPTIN4	KIF5C	ADAMTS9-AS2							TBC1D16	NEDD9	CNOT10
CKAP5								STC2																				COX7B							WASF3	CTHRC1	ELAVL3	BSN	ANPEP							AC004448.2	SYTL3	FOXN2
POLA2								PCSK6																				COX7C							PCSK5	TCF7L1	DOCK10	SYT14	NHS							THEMIS2	MICOS13	CDC42SE2
RNASEH2C								KLF7																				COX8A							PLSCR4	TJP1	PCDH10	MEGF11	PDLIM7							ITGB5	KIFC3	PPA2
ARHGEF39								CHST7																				COX8C							GAN	SORBS1	ROBO1	SH3GL2	CALCRL							TRIP12	BAX	SUMF1
HINT2								FGFR4																				CPOX							INTU	PXDN	SPINT2	PTPN5	A2M							NET1	LYL1	ARHGDIB
SMS								CXCL5																				CPS1							TEAD1	TPM2	ANKRD18A	APBA2	COL14A1							PHKB	PPP1CA	IL3RA
POLR3K								APLN																				CPT1A							GYG2	CDC42BPA	PLD1	MAST1	CCN2							IFITM2	MZT2B	CASP8AP2
SNRPD1								S100A3																				CPT1B							LINC00472	RHOJ	SELENOP	ZMAT4	LDLRAD3							HELZ	SOCS3	ARRDC2
CRIP1								MME																				CPT1C							ZBTB7C	NAV2	NDRG1	UNC5D	AL590999.1							ANKRD44	CYTOR
TUBA1C								GPC3																				CPT2							TCF7L1	BBS9	AC131944.1	GAP43	PACSIN2							NEAT1	REEP5
SMARCB1								GNB5																				CRAT							PITPNM2	RUNX1T1	ZCCHC24	NTM	IL34							C1QA	MID1IP1
CIAO2A								MAPK8IP2																				CRLS1							NAV3	STXBP4	SPATA13	ARNT2	TNS2							HIPK3	KDELR2
CENPS								ZNF674																				CROT							COL4A5	DOCK1	STAT2	PPP2R2C	OSBPL10							IL13RA1	IFRD1
SLC43A3								IGF2BP1																				CRY1							LMO3	SPSB1	ERMN	KCNH7	MAPK10							HNRNPH1	CHCHD7
ANAPC15								CCL13																				CRYZ							TUBB2B	EMILIN1	DOCK4	CACNB4	MAP1B							MCTP1	ALAS1
HCFC1R1								CKMT1A																				CS							DPP10-AS1	ADGRA2	EPN2	PPP2R2B	AFAP1							MEF2A	NDUFA4
ANXA5								TDRD12																				CYB5A							IL33	THSD7B	RTKN	AL008633.1	PXDNL							OSBPL1A	LDHB
HSBP1																												CYB5B							PRRX1	RUSC2	FAM13C	AC069228.1	RERG							CD72	COX6A1
NEK2																												CYB5R2							KIAA1671	AL445250.1	SH3D19	IGSF21	TEAD3							SGPL1	RAB32
MTCH2																												CYB5R3							AL157396.1	ZNF423	PPP1R14A	CNTN3	STARD8							GNA13	C12orf75
RFC3																												CYC1							MAN1C1	FARP1	ARHGAP22	LRRTM3	ZNF618							ENPP2	GTF3C6
PAFAH1B3																												CYCS							ITPR2	ROBO1	LPGAT1	SYP	RABGAP1							ZFHX3	TPM4
HPRT1																												CYP11A1							COL8A1	ACTN1	SEMA6A	ST8SIA5	AL139807.1							PTEN	P2RY13
DDB2																												CYP11B2							LINC00461	TENT5A	PALM2-AKAP2	GPR158	ATP10A							GRK2	NME2
ZDHHC12																												CYP24A1							ANOS1	LDB2	TUBA1A	UNC13C	KCNE4							GPR183	LILRB4
KIF18A																												CYP27A1							PALM	GRAMD2B	CADM1	NALCN	ADAMTS10							MVB12B	PTCRA
FANCD2																												CYP27B1							RGL3	SEPTIN11	ELOVL7	MIR9-3HG	HIF3A							QKI	DUSP1
CHAF1A																												CYTB							ZFHX4	ZNF385D	PHACTR1	RUNDC3B	SLC6A1-AS1							PLXND1	ANXA5
NUDT5																												D2HGDH							HSPB8	CMKLR1	PLPPR1	CTTNBP2	STEAP4							ATM	ARPC1B
EXO1																												DAP3							AC124852.1	RANBP3L	ZFYVE16	KCNH1	DDR2							DOCK11	ABI3
BARD1																												DARS2							FSTL1	FAM20A	MYO1D	KALRN	MGP							NUP58	DSCAM
HAUS4																												DBI							ASTN1	GLI3	CDK19	PLPPR5	USP13							MGAT5	TXNL4A
TIMM10																												DBT							BICD1	DLC1	RNF217-AS1	SGCZ	MRC2							SPTLC2	CYBA
CCNF																												DCAKD							HRH1	RAPH1	KIAA1324L	DLGAP3	CAV1							RANBP2	MBD4
PCMT1																												DCXR							PLCE1	CHD9	BIN1	ELAVL3	PDE1A							HERC1	NINJ1
ANP32E																												DDAH1							NFIA	SFRP4	KIF13A	NFASC	RCAN2							WARS	SRSF9
MRPL27																												DDX28							GLI3	MPP6	PIGC	SUSD4	ARHGAP17							DISC1	MT1X
ACYP1																												DECR1							MTSS2	GREB1	ZNF708	UNC5A	GRAMD2B							UVRAG	CAP1
VBP1																												DGUOK							PRICKLE2	ARHGEF40	CDH13	PITPNM2	PLSCR4							SIK3	TM2D2
CCDC18																												DHCR24							LINC00943	BACE2	ANK3	LHFPL3	TRIO							SIAH2	TMEM9B
CKAP2																												DHODH							LINC02824	SNED1	ZNF608	CACNG3	SERPINH1							CALHM6	ERCC1
PXMP2																												DHRS1							GRIK4	LINC00472	FRYL	ZFPM2	PCBP3							GAB2	TMBIM6
VPS25																												DHRS4							FOXG1	SDC2	TECPR2	PDZD2	SLC38A2							AFF1	IL1RN
PMF1																												DHRS7B							HEPACAM	PLEKHA5	APP	MAP7D2	AC093535.1							VPS13C	RNASE2
CDK4																												DHRSX							HSPB1	PLSCR4	LINC01630	AC096576.2	SMTN							SLC22A23	TOMM5
HAUS8																												DHTKD1							LMOD1	TNXB	ELMO1-AS1	ARFGEF3	CNN3							TET3	TGFB1
FANCL																												DHX30							PAUPAR	LAMA1	PIP4K2A	SLC8A3	SPRY1							ANKRD17	MGLL
SHMT2																												DIABLO							CARMIL1	FNDC3B	GRIA2	NSG2	FBXL7							EDA	PARK7
FIBP																												DLAT							PALLD	EMP1	NEDD4L	KIAA1211L	AC100793.2							RIC1	DAD1
CIT																												DLD							GABRA2	KIRREL1	CDC42BPA	DCLK2	AL138828.1							NCOA2	EIF4E
CALM3																												DLST							GALNT18	MMP19	SYT9	GALNT18	STK38L							BNC2	KRT10
FUBP1																												DMGDH							BCO1	TGFBR3	DTNA	AMPH	CTDSPL							APOL6	STK17A
PRR11																												DMPK							AC087564.1	AC083870.1	GPHN	ASTN2	CDK14							MAN2A1	CXCL16
UBE2A																												DNA2							OSBPL6	TNFRSF19	FAM107B	RAP1GAP	ADAP2							RNASE6	SERTAD1
CLN6																												DNAJA3							PANTR1	BGN	RASGRP3	RAPGEF4	INPP4B							GAB1	HMGN1
LSM5																												DNAJC11							CMYA5	EGR1	PADI2	CDH9	PALLD							LRBA	TALDO1
NASP																												DNAJC15							PLCD3	RBMS1	RASGRF1	LARGE1	AXL							DCTN4	UQCR11
NCAPH2																												DNAJC19							DPF3	MCC	AIF1L	AC025159.1	LARGE1							COG5	ENG
SCCPDH																												DNAJC28							PAPLN	CHST15	PDE1A	SGSM1	COL5A3							DST	RNASEK
POLD1																												DNAJC30							AC007666.1	MAPK10	TBC1D12	MARK1	SLCO3A1							ARID2	RBM3
CMC2																												DNAJC4							AL390755.1	GRK5	ZDHHC9	PTPRR	KALRN							NOTCH2	ELOC
CASP3																												DNLZ							LINC01726	MTHFD1L	AC125613.1	CNTN4	ADAMTS12							SPPL3	ARPC4
HIGD1A																												DNM1L							PDLIM5	MYL9	P2RX7	ANO5	LINC01091							CDKAL1	CHMP4B
PSMC1																												DTYMK							KIAA0319	C1RL	GSN-AS1	SEMA6D	ADAMTS1							ACSL1	SEC13
SNRPB																												DUS2							LINC01411	ANTXR2	MEIS1	MIR124-2HG	PCOLCE							AGFG1	TMED10
DNMT1																												DUSP26							USH1C	KIAA1217	ADAMTS4	TMEFF2	SPTBN1							RHOBTB3	MYL12B
SPDL1																												DUT							DOCK7	RRBP1	RETREG1	SYT7	FHL2							SRGAP2C	TUBB4B
SSRP1																												EARS2							ASTN2	LIN7A	SLC31A2	RNF165	COL6A3							SLC8A1	DCXR
PRPS2																												ECH1							HAP1	SLC7A11	PDE8A	NAV2	ADRA1B							SMARCA2	UNC93B1
AKR1A1																												ECHDC1							PHF21B	NNMT	PHYHIPL	KCNMB2-AS1	LMOD1							DDIT4	ORMDL2
ELOVL1																												ECHDC2							PPP2R2B	MPZL1	OSBP2	REEP1	OSBPL5							CTNNB1	SERPINB1
BRIP1																												ECHDC3							IQCK	ZIC4	PSEN1	LINC01250	NFATC4							USP53	SSR4
TRNAU1AP																												ECHS1							SMOX	AC007319.1	RFFL	MAPK10	MAP3K20-AS1							STK17B	EIF1
DCPS																												ECI1							AL078604.4	CLSTN2	MIR181A1HG	SORBS2	EPHA3							TBL1XR1	FKBP2
MRPS14																												ECI2							AL445426.1	DCBLD2	SNX30	THRB	TGFBI							EPSTI1	VDAC1
IAH1																												ECSIT							EMX2	SERPINH1	PEX5L-AS2	LINC01122	C2orf27A							HLA-F	PSMB6
LMNB2																												EEFSEC							TCF7L2	PAWR	DUBR	RNF175	ARHGAP44							RABGAP1L	ICAM1
ZGRF1																												EFHD1							SCD5	LATS2	ZNF704	PLPPR4	PDE8A							NUP214	EHD4
KNTC1																												EHHADH							ITGA6	HEPH	RNF130	PAK5	DST							WASHC4	GNG5
CEP152																												ELAC2							PPP1R9A	NXN	TCF12	ELAVL4	PTPN12							UBE2E2	GLA
H2AFY																												EMC2							ADRA1A	NRP1	RFTN2	KCND3	MAP4							CLASP2	CALM2
TACC3																												ENDOG							NTM	DZIP1L	LSS	FSTL4	PLCB4							CMIP	ATP6V1F
PSMC3																												EPHX2							PSD3	ARMC9	TBC1D2	CDH2	GP1BB							DDX17	MAFF
AP1M1																												ERAL1							TMEM132B	F2R	ATP1B1	GLRB	PARM1							C2CD5	COX5A
POLD3																												ETFA							TRIM9	OAF	ARHGEF37	IQCJ-SCHIP1	RORA							PIP4K2A	CD82
MRPL28																												ETFB							GLI2	LINC01197	AC098588.3	GPM6B	STK3							ZZEF1	PSMD8
RNASEH2B																												ETFDH							PTCHD1	RASGRF2	KCND3	C1orf21	TTC28							TBC1D9	IL17RA
MYL6B																												ETHE1							RHOJ	PTK2	KIF13B	RPH3A	ANTXR1							CLASP1	LTBR
IER3IP1																												EXOG							FABP7	TMTC1	TTLL11	ZNF385B	HES4							RAB20	EGR3
TCP1																												FABP1							ZNF423	SEC31A	SYT14	AC011474.1	RBMS2							MANBA	CCL4L2
PHF5A																												FAHD1							CEP112	ITGA5	APLP1	SHISA6	EFHD1							RFX3	NR4A1
PMVK																												FAHD2A							GPC5-AS1	TPM4	SCD	EML6	CNTN6							TBC1D1	IRAK2
COTL1																												FAM136A							RIN2	KCNE4	JAKMIP3	TMEM108	LURAP1L							HLA-DOA	STX17-AS1
NUCKS1																												FAM162A							KCND3	PCSK5	CPEB1	AL513166.1	THY1							MAP2K1	CCL3L1
SLC25A11																												FAM185A							AC008957.2	MSRB3	HIP1	PRKAR1B	MAP2							ARIH1	NFKBID
KATNBL1																												FAM195A							MCC	PMP22	TPPP	KCNB2	PLEKHG1							ARAP1	AL512603.2
SHMT1																												FAM210A							CYP4F11	AP002518.2	TFEB	GAD1	KCNQ3							STAG2	JDP2
WDHD1																												FAM210B							C1orf21	MICAL2	AP001783.1	AC069437.1	PXDN							HLA-DRB1	ADAMTSL4-AS1
POP7																												FAM213A							NTRK3	EDNRA	KIF1A	CDH22	ITGB5							WIPF1	NR4A2
CTNNAL1																												FARS2							DDR1	RFTN2	PLPP2	GRID1	KLHL23							SPATA5	PANX1
HIST1H2AM																												FASN							MAP1B	PLXDC2	KIF5C	MIR99AHG	FGD4							KIF1B	RASGEF1B
HSPB11																												FASTK							AC104574.2	EFNA5	LINC00877	DANT2	DAB2IP							VPS13B	GBP2
SNRPA1																												FASTKD1							FAM135B	KCNQ1OT1	KLK6	BASP1	UTRN							SNX6	KDM6B
HNRNPAB																												FASTKD2							FHOD3	PHLDB1	MAP4K5	PRICKLE2	MFGE8							ASB3	TSC22D2
GSTM1																												FASTKD3							TMEM232	MPDZ	CXADR	TVP23A	CLIC4							TGFBR2	EGR2
RPA1																												FASTKD5							APC2	XAF1	ALCAM	NTNG1	KITLG							SAT1	MT-ND1
RFC2																												FBXL4							AC073475.1	SPATS2L	RAB11FIP4	DCC	Z99289.1							IFIT2	MT-ND4
CHCHD1																												FDPS							TNRC6A	CLIC4	EXOC6B	ERICH3	AC064875.1							UBAC2	RIN2
HIST1H2BH																												FDX1							AL512662.2	FOS	AC010974.2	TENM4	LAMB2							ABCC5	SGK1
LINC01572																												FDX1L							AL109809.5	PXDC1	NECAB1	GRIK4	ATP8B1							EAF2	STAB1
CACYBP																												FDXR							DCLK1	NAALADL2	SPATA6	KCNB1	DMD							PDS5A	MT-CO2
LSM3																												FECH							FERMT2	AL356124.1	AC061958.1	KCNIP4-IT1	PDE7B							YAF2	MT-CO3
UBE2S																												FH							CADM3	SLC6A1	NXPE3	NPTXR	TCF7L2							GIMAP5	SKIL
RFWD3																												FHIT							AC083837.1	PRICKLE2	HECW2	CDC42BPA	STARD13							CTTNBP2NL	RILPL2
HAUS1																												FIS1							OSMR	MIR34AHG	HEPN1	RNF150	RAPGEF5							PLCL2	SRGN
AP1S1																												FKBP10							ID1	MYO10	AL392023.2	MIR137HG	PTP4A3							ANKRD11	GNAS
ELAVL1																												FKBP8							AC022509.2	CEP112	ENPP6	KIAA1549	BGN							THADA	NFKB1
MPC2																												FLAD1							OAF	LRRK1	SLC22A15	PANTR1	ZBTB46-AS1							MARCKS	BCL6
CSE1L																												FOXRED1							RFX2	TANC1	CHADL	DZIP1	PALD1							USP34	RHEB
BOLA3																												FPGS							ASPH	MT2A	VLDLR-AS1	AC116565.1	SPECC1							PIK3R1	MT-ATP6
KATNAL1																												FTH1							SMAD9	FMNL2	STARD9	DST	HEY2							NR4A3	MIR222HG
GMPS																												FTMT							NRXN1	COL27A1	CLIP2	C1orf61	PPP1R12B							BRAF	ETF1
SARNP																												FTSJ2							C21orf62	GPR173	AC020907.1	DLGAP1-AS4	MCU							MBNL1	MT-CYB
MRPL37																												FUNDC1							MAGI2	C2orf27A	SOX2	LINGO1	RFTN1							AC002451.1	MT-ND2
PTBP1																												FUNDC2							GNG12-AS1	AFF3	TLL2	LHFPL4	AL355612.1							TPK1	MAP2K3
MRPS36																												FXN							PLXNB1	AC092839.1	NAALADL2	MYRIP	ROCK2							FOLR2	VPS37B
C12orf75																												GADD45GIP1							SPEG	PAPPA	MYO1E	KIF3C	DDAH1							NCOA3	MCL1
MIR4435-2HG																												GAPDH							MAOA	CDK14	NRXN3	MPPED1	COL24A1							MAP3K5	IKZF1
GET3																												GARS							HEPN1	LAMB2	TYRO3	UCHL1	SMURF1							ADAM17	MIR4713HG
PRPF38A																												GATC							P2RY14	UGGT2	PRRG1	GUCY1A2	SLC19A1							NRP1	ATP1B3
RECQL																												GATM							AEBP1	EPB41L2	RAB30	DENND5B	SLC12A2							FRYL	CD86
LAP3																												GBAS							ITGB5	ATP1A2	ZEB2	BRINP2	PPARG							WWOX	TPM3
NUTF2																												GCAT							OGFRL1	SOX5	SIRT2	LRRN2	TRAK1							IFITM3	VSIG4
GTF3C6																												GCDH							SDC2	RHOBTB3	OTUD7B	MAP1B	RNF24							CPEB4	TPT1
DHX15																												GCSH							PON2	THBS1	AC108449.1	ADGRB1	NFIA							RBMS1	ARID5B
RBBP7																												GDAP1							RNF182	ALDH1A2	AOPEP	ARHGAP32	ARHGEF7							XAF1	FTH1
ARL3																												GFER							MYO10	FOSB	RALGPS1	SLC2A13	AL139317.5							XPO6	MT-CO1
MCM6																												GFM1							AC093865.1	CAVIN1	ASPA	STOX2	ACSS3							BIRC6	RAB8B
CDK5RAP2																												GFM2							BCAR3	NIBAN2	AC006059.1	OLFM1	SEPTIN11							RAPGEF6	TRIB1
XPO1																												GHITM							LIMCH1	TBC1D16	AC092939.1	RGS7BP	FAM241A							MYCBP2	NCK2
SRSF1																												GK							AL358154.1	ZCCHC24	TULP4	GRM1	SH3RF3							TRA2B	FOSB
NELFE																												GLDC							SPRY4-AS1	LOXL2	CHD7	CIT	KIF13A							DICER1	B4GALT1
PSRC1																												GLOD4							DOCK1	SKIL	PTPN13	ABCC8	CAV2							CREBL2	CHSY1
SRPK1																												GLRX2							KIF1A	ITSN1	MUSK	GALNT9	TJP1							PECAM1	ELL2
BLVRA																												GLRX5							AC092691.3	COL4A5	ST3GAL5	RBFOX2	ADAMTSL3							FGD2	ACSL1
NDUFA9																												GLS							AL137009.1	TCF4	MOB3B	SGCD	F3							SETX	CEMIP2
YWHAH																												GLS2							RHOB	ELN	AL160254.1	EML5	NES							IGF1	PPARG
GGCT																												GLUD1							NHS	AFAP1	CPNE2	SCAMP5	VMP1							NLK	NLRP3
MPC1																												GLYAT							PLOD2	TUBB6	DPP6	PBX1	COL27A1							MTSS1	RGL1
UCHL5																												GLYCTK							NAV1	ECM2	PSD3	FAT3	EMP2							PPARD	SYAP1
STOML2																												GNG5							ACTN1	BMP1	C12orf76	MYRFL	EGFR							RAPGEF1	PEAK1
HLA-DRB1																												GOLPH3							TPST1	KLHL29	BEST1	DIP2C	NOSTRIN							AC011586.2	MT-ND5
C21orf58																												GOT2							BBOX1-AS1	UGDH	CCP110	PLEKHA6	SLC20A2							IL1RAP	NAMPT
TEDC1																												GPAM							WWTR1	RIN2	IQCJ-SCHIP1	PTPRN	GLI3							CAMK1D	BTBD19
BAZ1B																												GPD2							ADCYAP1R1	AASS	AL162511.1	DSCAML1	ECM2							ENOX2	RASGRP3
TIMM17A																												GPI							AC002429.2	TUSC3	LINC01505	AC005753.2	RBMS1							ANKHD1	SPRED1
HSD17B10																												GPT2							ZMAT1	PDE1A	AUTS2	PACRG	ARHGAP24							TBC1D15	CD14
RSRC1																												GPX1							TMEM220-AS1	TEAD3	PTN	RNF180	PLA2R1							ARHGAP12	IL1RAP
ACD																												GPX4							THBS3	EFHC1	AC106729.1	NEXMIF	PLOD1							PKN2	SLC38A2
PSMC2																												GRHPR							SEMA3A	NAP1L1	DBNDD2	ME3	JMJD1C							ELF2	STX11
SMC3																												GRPEL1							CECR2	NBEAL1	AP003086.1	CACNG4	PCSK5							NEK7	MT-ATP8
CBX1																												GRPEL2							C4orf19	NECTIN2	SLC12A2	TANC2	ENAH							TBC1D4	MPP1
NAA38																												GRSF1							TNIK	EFNB2	MIR100HG	MMP17	PTPN14							FAM91A1	SNX9
STAG1																												GSR							ZHX3	SMC5-AS1	MFAP3L	SLC8A2	ADCY3							LENG8	KLF7
GUSB																												GSTK1							GPM6B	CP	RYBP	EPHA5	ASAP2							OTULINL	POLR2A
CNTRL																												GSTO1							ARHGAP42	PDE3A	HEPACAM	MPPED2	FKBP10							TRAPPC9	TFRC
POP4																												GSTZ1							DGKG	C2CD2	DENND5A	ZNF804A	MYOM1							COMMD10	LYN
MTHFD2																												GTPBP10							AL354740.1	PLOD2	FEZ1	MSRA	PKD2							POGZ	B3GNT5
RER1																												GTPBP3							MFAP3L	SEMA3C	TSPAN15	RTN1	AL365214.2							GPRIN3	NFIL3
MT2A																												GTPBP6							AC087482.1	YBX3	MTMR7	BRSK2	CTBP2							CCDC18-AS1	INO80
NABP2																												GUF1							TLR4	RAI14	PI16	CALN1	ADAMTS4							RPS6KC1	SPTLC2
DUSP23																												GUK1							ARHGEF10L	LPAR1	AL160269.1	AC092745.5	SBF2							TAOK1	MT-ND3
ATP5MC3																												HADH							2023-12-01	GSN	GREB1L	TJP1	TRAM2							DMXL2	CLEC7A
VMA21																												HADHA							ARHGAP31	LDLRAD3	AC098617.1	NPAS3	UNC5C							NAALADL2	USP36
PRPSAP1																												HADHB							OSMR-AS1	NPAS2	CACNA2D1	KCNQ5	PHLDB1							CLTC	ITGB5
LAMTOR2																												HAGH							AC007666.2	PCCA	KIAA1755	OSBP2	SPRY4							MT2A	ABL2
NELFCD																												HAO2							ARHGEF10	SPRY4	TESK2	TSPYL2	BACH1							ST6GALNAC3	C3AR1
TIMM23																												HARS2							ARHGEF17	MYO6	SEMA3C	NRG1	NID2							RAB8B	GNA13
POLE2																												HCCS							PLEKHG1	PCBP3	ITGA2	JAKMIP2	IFT43							BMP2K	MCF2L2
HIST1H3D																												HDHD3							EFR3B	AC008957.2	HTRA1	ADCY1	PRSS23							TNFRSF14	MIDN
FUNDC2																												HEBP1							SDC4	PSD3	AMD1	BASP1-AS1	NECTIN2							KCNMA1	LPCAT2
NOP56																												HEMK1							EFNA5	GNG12	TP53TG5	ABLIM1	PLEKHA5							PDE4B	DDX3Y
TMX1																												HIBADH							GABRB1	STK3	CFTR	OPHN1	PDGFA							PUM2	PARVB
ZWILCH																												HIBCH							SOX2	NR4A1	AL136298.1	PTPRZ1	MYO6							SLC66A2	DENND4A
MMS22L																												HIGD1A							EMID1	PBX1	GRID2	FAM153A	WDFY3							PDGFB	ARID5A
LUC7L2																												HIGD2A							CFAP70	CFI	GALNT15	DPY19L2	WTIP							WDR45B	MT-ND4L
TIMM8B																												HINT1							GINS3	CHSY3	CORO2B	ARHGAP44	AC026894.1							DOCK8	FCGR2A
HDGF																												HINT2							FZD3	DHRS3	GNAI1	AC007563.2	TCF7L1							PPP2R5C	PLA2G4A
EED																												HINT3							TNFSF14	PLEKHH2	BBS2	MYH10	MTUS1							INPP4A	AC020916.1
LSM4																												HK1							BAG3	PDLIM5	CHKA	CADM1	ITGA10							SAMHD1	NCL
SIVA1																												HK2							CACNA1C	PRKD1	CDH1	AJAP1	XAF1							WASHC2C	RANBP9
EIF4E																												HMBS							SEC11C	KALRN	COL18A1	NDST3	SOGA1							FAM102B	IFITM10
TXNDC17																												HMGCL							MKLN1-AS	MIR4435-2HG	FNTB	TRHDE	CPE							SGK3	MB21D2
UBE2E3																												HMGCS2							AC138123.1	ADAMTS9	AP000282.1	GABRA4	RUNX1T1							RCSD1	NR4A3
COPS3																												HOGA1							AC023282.1	CASC15	SASH1	GABRA1	AL139147.1							GBP1	MAPKAPK2
CISD2																												HRSP12							RASL12	PER1	DICER1	CA11	AUTS2							EIF4G3	ETS2
MAP4K1																												HSCB							AL139142.1	TNKS1BP1	HHATL	PDE2A	MIR99AHG							ADAR	STK38L
MLH1																												HSD17B10							EML6	TMEM263	OLIG1	SNRPN	TCF4							ZNF638	TGFBR1
DNAJC15																												HSD17B4							HOPX	PRDM5	AFDN	CUX2	C1R							ZMYND8	MARCKS
TMEM167A																												HSD17B8							ACACB	DSE	PPP3CB-AS1	SULT4A1	RUSC2							UBA7	LCP2
EXOSC3																												HSDL1							SAMD4A	IFI44L	LRRC7	KIF1A	ITGAV							MAML3	USP16
LSM2																												HSDL2							ADD3-AS1	ODF2L	CPB2	FLRT2	NIBAN2							AP3B1	ATP13A3
EMC9																												HSPA9							MGAT4C	DOCK5	FNIP2	UPP2	NMD3							RILPL2	RUNX1
MRPS16																												HSPB7							HYDIN	ANGPT1	MBNL2	WDR17	MRVI1-AS1							GSAP	FGD4
MPST																												HSPD1							MFHAS1	SLC25A37	FUT9	CALY	ATP1A2							AC087286.2	HIF1A
HAT1																												HSPE1							NACC2	ITGAV	SLC35D2	KIF26B	NCKAP1							TRAK1	AC084871.1
GLRX3																												HTATIP2							CRYAB	CYBRD1	TRIM9	KIF5A	PBX1							CTTNBP2	PPP1R10
CNIH4																												HTRA2							LINC01579	PTPN13	AC012358.3	TRIM2	PLXND1							OGFRL1	DDX24
SUMO3																												IARS2							OPHN1	APOL1	CRYBG3	CPNE5	SASH1							HLA-C	MGAT5
MAZ																												IBA57							KIF1B	SLC24A3	ATG4C	SRGAP3	IMMP2L							TRIM14	MIR646HG
FAF1																												ICT1							LRP1	KAZN	KIF1B	KNDC1	EPB41L4A							PTK2B	TATDN2
SNRPG																												IDE							BMPR1A	SCMH1	LRRFIP2	SCN3B	AKAP12							AKAP9	GLS
SPATS2L																												IDH1							DLG2	CCNL2	AP003025.2	NGEF	MAST4							RNF115	SIK3
MOB1A																												IDH2							FADS2	FERMT2	MKRN3	LONRF2	GHR							TANC2	TRA2B
MAGOHB																												IDH3A							PACRG	CALU	HPN	JPH3	TLE1							DSE	CH25H
GLO1																												IDH3B							PCDH9-AS2	CRYBG3	AC011997.2	PTPRS	TMEM108							RB1	AL139807.1
SUCLG1																												IDH3G							LHFPL6	ZEB1-AS1	HCN2	NR2F1-AS1	TNKS1BP1							SIK2	NUDT4
ACTG1																												IDI1							LINC01138	RASSF8	NFIX	SLC4A8	PAG1							SLC19A2	PTPRJ
NDUFS3																												IFI27							IGSF11	ARNT2	DOCK9	SLC1A2	CD36							DLEU1	ATL2
CEP57																												IMMP1L							LDLR	CREB3L2	DYNC1I1	LRRC49	LINC02147							SOS1	RANBP2
SASS6																												IMMP2L							AC092902.4	ANTXR1	GAREM1	FAXC	RHOJ							ACSL3	GNB1
RBM42																												IMMT							ARMH1	CYTH3	AGTPBP1	CKB	PCED1A							FBXL17	RABGEF1
PRDX3																												ISCA1							AC093305.1	BMPR2	AC016597.1	MAPK4	PPM1L							SLC12A7	IL6R
PGAM1																												ISCA2							SUCLG2-AS1	EVC2	CUEDC1	SOX6	PHLDA1							C6orf62	ITGAV
ETFA																												ISCU							KAZN	SPRED1	AP003025.1	MIAT	TIMP1							RREB1	TMEM156
DPM2																												ISOC2							METRN	AL158152.1	ELF2	FAM78B	UNC13B							AL163541.1	HLA-DRA
NFATC2IP																												IVD							SLC39A14	MSC-AS1	TANC2	GDAP1	OAF							HEATR5B	TNFRSF1B
OXCT1																												KARS							AL589935.1	PLD1	FAM171A1	MIR100HG	MEG8							RBM39	CCNL1
MANF																												KIAA0100							TRPM3	VMP1	AFMID	RTN4RL1	HECW2							SDK1	YWHAZ
PDS5B																												KIAA0141							GRAMD2B	RBMS2	MAPK8IP1	MYO6	ROBO1							DIP2A	PLEKHO2
ANAPC11																												KIAA0391							OSBPL11	GUCY1A1	HID1	SHANK1	ITSN1							WDFY3	SRSF3
PAICS																												KIF1B							PTTG1IP	WWC2	STXBP6	ZFYVE9	STARD13-AS							FBXL20	MAGT1
AC091057.6																												KMO							LINC01515	SPACA6	EPCAM-DT	AP3B2	LRCH2							XRN1	PTPN6
IDH2																												KRT5							ABCC9	MINDY4	AC008771.1	MTCL1	AC017101.1							KMT2E	SNX8
HLA-DMA																												L2HGDH							ROR1	LMO7	NCOA7	LINC00511	SYTL2							NIPBL	DHX34
HACD3																												LACE1							AC024145.1	OSBPL10	KIAA1958	MCTP1	SOX4							PHF21A	CD81
GNG5																												LACTB							PPFIA1	ADAMTS10	SGIP1	TENM1	CEP112							RUFY3	ATP6V0A1
GSTO1																												LACTB2							LMCD1-AS1	ZBTB16	LGR5	OXR1	POU6F2							NRIP1	TTYH3
FAM83D																												LAMC1							AC105942.1	PTPN14	TMCC3	BAALC-AS1	CSNK1E							MAML2	FAM20C
PSMD7																												LAP3							MACROD2	NFKBIZ	ZBTB16	LMTK3	ANO6							CCND3	RIPK1
RTN3																												LARS2							MSI2	WLS	RASGRF2	APP	MYO1C							PIK3C2A	TMED5
MRPL17																												LDHAL6B							DDR2	FLG-AS1	STAG3	PHACTR1	DYNC1I1							KCTD12	TMSB4X
CEP128																												LDHB							SCRN1	DPYSL3	SPATA22	CAMSAP2	INPP5A							SENP7	CAPZB
PSMB2																												LDHD							TENM2	KCNQ3	SLC25A13	MGAT4C	NR6A1							ASH1L	UBE2W
PARVG																												LETM1							CHI3L2	NRIP1	TMEM184B	SYNPR	ITGB1							GOLGB1	ADAM17
CCNE2																												LETM2							ARNT2	ANXA1	MEIS2	RHBDL3	NRXN3							ZFYVE16	AFF4
ARHGAP19																												LETMD1							FSIP2-AS1	SH3RF3	DDR1	GNAL	IL1R1							SLMAP	NEURL2
TALDO1																												LIAS							AC026803.3	ZFPM2-AS1	PDK4	WNK2	EPB41L2							SYK	SERPINB9
GIHCG																												LIPT1							ECHDC2	TAGLN	KEL	SEMA3E	SLC2A3							IMMP2L	CDV3
DDX11																												LIPT2							STOX1	ABI2	GRB10	PDZRN4	LOXL2							CCDC91	YWHAG
CENPL																												LONP1							MIR100HG	LPP	NCKAP5-AS2	LRRC4B	ERC1							PTPRG	REL
POLA1																												LONP2							AC093879.1	ARHGEF10	AC087564.1	OTUD7A	THBS1							PBX3	AC005920.2
GALM																												LRPPRC							CASC2	OSBPL5	SGK2	TMOD2	NR2F1-AS1							HLA-DQB1	SH2B3
TXN2																												LYPLA1							CD109	FOXO3	RHOBTB1	SYT17	ATP10D							SPATS2L	RCAN1
CDC123																												LYPLAL1							DYNC2H1	MIRLET7BHG	GAB2	SLC22A17	WWC2							PRRC2B	CDC14B
PFKL																												LYRM1							FAM167A	LTBP3	AASS	PPFIA4	FLNB							TRIO	MCUB
DBF4																												LYRM2							SPATA6	PMEPA1	BOK	KCNC1	CCN1							PIKFYVE	MSN
CENPX																												LYRM4							FAM171B	DUSP1	PCDH9-AS4	PRKN	ZIC4							KIAA2026	RAB20
SYNCRIP																												LYRM5							CTDSPL	PLEKHA4	PPP1R16B	ZFHX2	CPED1							MON2	SH3RF3
CNPY3																												LYRM7							FARP1	SEMA5A	SERPINI1	NKAIN3	WWTR1							AMPD2	RAB31
CEP192																												LYRM9							CRISPLD1	TSHZ3	CECR2	ICA1L	PDE1C							KDM4C	ARF4
SSNA1																												MACROD1							AC108519.1	MAP4	RASSF2	PHACTR3	PTPRM							TGFBI	PABPC1
PPIF																												MALSU1							HSD17B14	SAMD4A	PLEKHG3	SOX5	SLC2A9							TMEM117	ANKRD28
TMEM14C																												MAOA							ST5	IFI44	MAGI1	SCD5	TRIB2							EFR3A	PRKCA
NDC1																												MAOB							CNTN1	BDH2	VRK2	AP001825.1	CAMSAP2							RBM5	CRK
NUDC																												2023-03-01							NEK11	NFIC	STMN4	PCDH9-AS2	BBS9							EPS8	ANKH
WDR5																												2023-03-02							GPT2	CEP126	HIPK2	AC011287.1	AC092839.1							GNG2	EZR
SUPT16H																												2023-03-05							ANTXR1	CDC42BPB	SHB	CPE	MYH9							KANSL1	CD276
ITGAE																												MARS2							ITPKC	ADAMTSL4-AS1	CD9	SEZ6L2	RIPOR3							TPT1	SLC4A7
RHEB																												MAVS							RASSF8	EPAS1	RGL1	ESRRG	NFASC							CD2AP	PPARD
SLBP																												MCAT							C1RL	RAPGEF4	TMEM98	REEP2	PRKD1							ATP8B4	CLTC
VDAC3																												MCCC1							CP	KIAA1211	IKZF2	CAMTA1	PDE9A							PHIP	SYNJ1
SNRPA																												MCCC2							CDS1	SMG6	PPFIBP1	RGS6	BACE2							PRIM2	CLTA
AL441992.1																												MCEE							NBPF14	IFT140	LRP4	SV2B	BCL6							TSC22D3	AC079015.1
DERA																												MCU							PRTFDC1	NT5DC3	WDFY3	FRY	SORT1							NSF	IL6ST
IFI27L2																												MCUR1							ITGB8	CTTN	MYH11	ST6GALNAC5	PDZD2							POU2F1	RNF19B
CEP78																												MDH1							CGNL1	NEAT1	MTURN	BMPER	STXBP4							USP36	TUT7
SUZ12																												MDH2							COL23A1	AL078459.1	DPYD-AS1	AC073050.1	CAVIN1							FBXW7	PTPN1
TAF15																												ME1							MIR3936HG	CMTM8	GATM	CDH4	DGKH							ATRX	KCNK13
SNRNP40																												ME2							C2orf72	DZIP1	B3GAT1	GABBR1	MYO1D							SCAPER	GOLGA4
MPDU1																												ME3							LRRC8A	WASF3	GIPC1	SEMA5B	MEIS3							SRRM2	ZNF33A
PSMD2																												MECR							AC004470.1	NBEA	PPFIA2	SGIP1	CHN1							ZNF644	NIBAN1
CHCHD2																												METAP1D							CACNB4	JAG1	ARAP2	GTF2IRD1	ABLIM2							GRAMD2B	RCOR1
CD38																												METTL15							AC104596.1	ROR1	ARHGAP24	PACSIN1	RSU1							INPP5D	HNRNPC
PLGRKT																												METTL17							AF117829.1	CNN3	CASTOR3	TMEM59L	MYO1E							BTBD9	STAT3
MRPL11																												METTL5							JAKMIP2	AL137139.2	FBXO32	TTC28	STAMBPL1							PCCA	SP140
PAQR4																												METTL8							PTPRF	RCN1	ABHD17B	KCTD8	AMOTL1							ZSWIM6	P2RX4
HDAC2																												MFF							TMEM132E	KIF13A	MATN2	NLGN4Y	DLGAP4-AS1							WASHC1	CCNH
BANF1																												MFN1							DANT2	SPRY4-AS1	ADGRL3	MAP6	GNG12-AS1							GPR82	CD58
DAZAP1																												MFN2							MAST4	SPATA6	FAXDC2	CLSTN2	SMARCD3							HDAC8	EIF5
SLC29A1																												MGARP							ZFP36L1	FGFR1	MXI1	AQP4-AS1	RAPGEF2							SPIN1	TCOF1
MT1E																												MGME1							AC009163.1	SRGAP1	BTBD3	ANK3	FAM114A1							CERS6	MKNK1
LSM6																												MGST1							SRGAP1	WDR27	RCBTB1	VSTM2B	NDRG2							DENND1B	RASSF5
AP3S1																												MGST3							SYT17	RIPOR3	AC007566.1	CPT1C	DIAPH2							SPG11	RNF168
UQCRC1																												MICU1							NR2F1-AS1	MCL1	SORCS2	AP001831.1	RUFY3							SAMD9L	ILF3
CENPJ																												MICU2							PLPP4	TLE1	ST3GAL4	TCF4	HIF1A-AS3							PML	AC046195.1
ENY2																												MIEF1							ENAH	SVEP1	INSYN2A	ADAM22	CERS6							GRASP	MAP4
TCERG1																												MINOS1							NFIA-AS2	FLNA	NINJ2	MCF2L2	KIAA1217							KIF13B	PNPLA8
FANCA																												MIPEP							CHPT1	PALLD	LGI3	SEPTIN3	MICALL2							TCF7L2	MAD1L1
PLAAT3																												MLH1							COLGALT2	MAP3K20	AC063944.1	MEF2C-AS1	AL513327.1							IL15	RAB1A
BUD31																												MLYCD							LINC02614	PTEN	AC021054.1	CLVS1	SRGAP1							STAU2	ARHGAP26-AS1
TMEM107																												MMAB							NAMPT	SGCD	FN3K	GRK4	DLEU2							XPR1	CREM
COA3																												MMACHC							LINC00903	PEAK1	SLC48A1	KCNQ3	SEC24D							AVL9	GPCPD1
EXOSC9																												MMADHC							GRAMD1C	GNG12-AS1	NUAK1	AL591501.1	LATS2							FLI1
PIN1																												MOCS1							NOL4	PTN	BACE2	MAP7	MOB3B							FAM172A
PSMA4																												MPC1							MSI1	C1RL-AS1	KCTD3	AL391807.1	UBE2E1							N4BP2L1
FDPS																												MPC1L							DDAH1	SERPING1	GLTP	PTK2	COL7A1							PNISR
AP2S1																												MPC2							FANK1	FOSL2	RHBDL2	ADGRL1	ENG							RPS29
PSMB5																												MPST							PAPPA	AHNAK	KCNK1	KCNN2	SEPTIN4							KAT6A
KNSTRN																												MPV17							ZNF98	DNMBP	MTMR10	CDK14	HEG1							UBASH3B
PSMG1																												MPV17L							NKAIN4	CNTLN	SPECC1	LMO3	ITPR1							CCNY
POLR2J																												MPV17L2							B3GALT5	NEXN	CNKSR3	PKNOX2	CDK8							TENT2
CDKN2A																												MRM1							AC016705.2	PPM1H	SH3BP4	NIM1K	CTNND1							CTNND1
ACTN4																												MRP63							NTN1	ASAP2	LINC02073	CHL1-AS1	ENTPD1-AS1							CSNK1G1
EIF4A3																												MRP63P6							NLGN4X	AF117829.1	CBR1	WASF1	LURAP1L-AS1							OSBPL3
MPHOSPH9																												MRP63P7							DENND2A	ZNF618	PLEKHB1	TENM3	PPP1R12A							TNFSF8
CENPQ																												MRPL1							RGS12	PKNOX2	EPHB2	HOMER1	SPRY4-AS1							RASA1
PSMD1																												MRPL10							ITGAV	AC093535.1	STARD13	CREG2	ZEB2							SNRNP70
ENTPD1																												MRPL11							JUN	DYNC2H1	EVA1C	TLN2	KIAA0040							TIMP2
SLF1																												MRPL12							TMEM178B	CECR2	SGK3	LNX1	ACTN4							YLPM1
TRIM28																												MRPL13							AC091826.2	SLC20A2	TUBB4A	MED12L	KIF26B							GASK1B
NDUFA7																												MRPL14							SAT1	SETBP1	RIN2	ILDR2	CDC42BPB							AFF4
RRP7A																												MRPL15							SNAP91	AXL	MAP6D1	ABLIM2	PKIG							PABPC4
PUF60																												MRPL15P1							SHISA9	ASPN	BACE1	RIC3	MARK1							CEP350
PBRM1																												MRPL16							IRS2	NOTCH2	NT5DC1	DNER	ARFGAP3							PDK3
RAB8A																												MRPL17							MYBPC1	RMDN2	GARNL3	SPTBN2	SLC12A7							OPA1
ILF3																												MRPL18							NEO1	TTLL5	SGMS2	FUT9	AL050309.1							PAPOLG
TMEM160																												MRPL19							AC007389.3	WIPI1	PTPRS	AC027288.3	AC012459.1							KLHL6
GTF3C5																												MRPL2							ZNF462	ALDH7A1	EEPD1	TMEM63C	SLC8A1							NR3C1
TMEM70																												MRPL20							CERS1	TGFBR2	AC106845.1	SLC8A1	CLIP2							PPM1L
PHGDH																												MRPL20P1							LGALS3	NHS	PGBD5	ECE2	BICC1							SLC38A9
NTAN1																												MRPL21							CKB	ENG	NFIA	SOX2-OT	ZNF423							AZIN1
SCLT1																												MRPL22							ZNF516	AHI1	KCNH1	NRG2	SOX13							TMEM176B
RAB11B																												MRPL22P1							CHST6	CEBPD	TLE4	AC005400.1	FLNA							ERBIN
YBX1																												MRPL23							FRMPD3	AC020916.1	TMCC2	MIR3936HG	OSMR-AS1							TMSB10
MASTL																												MRPL23-AS1							MEGF10	EVC	LDLRAD3	MCF2L	SPATS2L							ITFG1
ETFB																												MRPL24							IL1R1	LMNA	GLUL	CACNG7	APP							CREBBP
SSR3																												MRPL27							SNTA1	UST	FGF1	PLXNA2	WLS							MIR99AHG
ALYREF																												MRPL28							PURG	UNC5B	UBE2E2	CPLX2	NUDT4							SNX8
THOC3																												MRPL2P1							SOX9-AS1	MFGE8	DPYSL2	TPST1	CYFIP1							ZNF655
POLR2G																												MRPL3							PHYHIPL	ASAP1	GDAP1	DLGAP4	PLCL1							USP32
MMADHC																												MRPL30							PLEC	DANT2	AL158077.2	B3GAT1	CADPS2							AKAP10
ADRM1																												MRPL32							NEK6	RNF217	WSB1	LINC00882	VASP							CHMP1B
GEN1																												MRPL32P1							HNF4G	MAGI2-AS3	PDZD2	ADAMTS19	AFAP1L2							KLHL5
PSMB7																												MRPL33							PLAAT3	MID1	AMPD3	AC008056.1	STAT6							ST3GAL1
ACAA2																												MRPL34							FAT1	GAS7	AL590006.1	NOVA2	ANKRD33B							ACAP2
MRPL12																												MRPL35							YBX3	SKI	AP001021.3	SLC6A17	DENND3
LINC01934																												MRPL35P1							AC116345.1	CPQ	NEK3	FSTL5	TUSC3
PSMA3																												MRPL35P2							ANKRD45	AP000331.1	INF2	2023-03-01	BCAR1
MIR155HG																												MRPL35P3							MOK	APP	INSR	PEX5L	FBXO32
FANCB																												MRPL35P4							GOLIM4	CHSY1	SPTBN1	ZFPM2-AS1	DLGAP4
PDAP1																												MRPL36							ZNF521	PC	STOX2	RCAN2	AL078459.1
HMGN1																												MRPL37							BAIAP3	PLXNA2	ELOVL1	NTN1	KLF6
CENPO																												MRPL37P1							DAAM2	GOLGA2	AC008728.1	SYNDIG1	DCBLD2
IMMT																												MRPL38							WNK2	TPCN1	PTPRF	TMOD1	DGKB
NUDCD2																												MRPL39							SOX21-AS1	PLS3	STARD13-AS	RAPGEFL1	MIR34AHG
MEA1																												MRPL3P1							WFS1	AC026894.1	PLXNB1	SYNGR1	UBA2
STIP1																												MRPL4							AC092924.2	PTGDS	FNIP1	GFRA2	ANGPTL4
ACP1																												MRPL40							FAM198B-AS1	PTPN9	INPP5F	GRIP1	NUAK1
SNRPD3																												MRPL40P1							FSIP2	AL513327.1	CORO1C	CASKIN1	MPRIP
NONO																												MRPL41							AC021231.1	CTIF	HIP1R	MAGI1	LRIG1
SUV39H1																												MRPL42							UNC79	AKAP1	DPYD	MYO16	NNMT
ODF2																												MRPL42P2							PC	JAK2	TCP11L2	PSD	ANXA6
MYCBP																												MRPL42P3							SLC3A2	ABL1	KIF19	AL096803.2	SVEP1
EIF4EBP1																												MRPL42P4							WARS	MIR22HG	CTTN	PRSS51	FER
SNX1																												MRPL42P6							NFIX	CTBP2	AC105383.1	TRIO	NF1
BLM																												MRPL43							DHRS3	TNFRSF10B	CLIC4	GLT1D1	ATF3
PSMD13																												MRPL44							ARHGAP32	SLC38A2	AC098829.1	HDAC9	RNF180
MCUR1																												MRPL45							CLIP1	PALM2-AKAP2	ZNF652	HYDIN	WDR41
CBX3																												MRPL45P1							ANO8	SGIP1	DNER	AC079385.1	KLF7
CYC1																												MRPL45P2							CYB5B	2023-03-03	KCNK10	FAM189A1	AC004889.1
MRPL52																												MRPL46							AC079848.2	LAPTM4A	ATL1	KIF9-AS1	PLPP1
SF3B4																												MRPL47							FGD6	URB1	GCNT1	ADGRB2	DCBLD1
SNRPC																												MRPL48							NPNT	PRKCA	ZDHHC14	KCNK1	TUBB6
C1orf112																												MRPL48P1							NAALADL2	ZMAT3	LTBP1	B4GALT6	SPC25
LBR																												MRPL49							HDDC2	MAP4K3	AC092924.2	AC124852.1	MPDZ
MSH2																												MRPL49P1							LINC01376	PTPN21	AC092881.2	AGAP1	MEF2D
NENF																												MRPL49P2							GNAO1	UBE2E2	BRSK1	AC006148.1	CAMK2D
GPAA1																												MRPL50							ACSS1	RUFY3	AC233296.1	ERBB4	PITPNB
OLA1																												MRPL50P1							EPHX1	GLCE	TJP2	AUXG01000058.1	ZNF532
RAB1B																												MRPL50P2							MAGI1	CFAP44	ZDHHC11B	BCL11A	DZIP1L
SNX5																												MRPL50P4							NSMF	JUN	AL589740.1	PHYHIPL	Z82215.1
CDK2AP2																												MRPL51							SLC18B1	STAT3	CRYL1	IQSEC3	RHOBTB3
COMMD4																												MRPL51P2							EPHB1	MAML3	MYH14	CNTNAP1	DSTN
SUV39H2																												MRPL52							BCAT2	TCF7L2	FAM102A	WWC1	ENTPD1
GTF2A2																												MRPL53							SYT14	IL4R	BRF1	NAALADL2	MED13L
PSMG2																												MRPL53P1							AKAP6	TRPC1	FHIT	FAM66C	HIF1A
YWHAE																												MRPL54							SPOCD1	CALCOCO2	IRAK2	RUNX1T1	BMPR2
TMEM109																												MRPL55							PNPLA7	PRR16	NAV2	ZNF483	APOLD1
PABPN1																												MRPL57							LINC02340	YES1	ADAMTS14	ASXL3	DIRC3
RAB11A																												MRPL9							CRMP1	ARHGAP6	CTNNA2	PGBD5	FAM110B
PKM																												MRPL9P1							TRAF3IP2	NUMBL	WWOX	NFIB	AP002518.2
PDCD5																												MRPS10							AC124947.1	ECE1	JAKMIP2	ADGRL2	C1orf54
CHAF1B																												MRPS10P1							DZIP1	AFF4	SCARB2	PCSK1N	SERPINE1
FN3KRP																												MRPS10P2							AC015908.3	PHC2	NOVA1	TACC2	NR4A1
PARVB																												MRPS11							TULP3	OSBPL9	REPS2	SLC1A1	BCAS3
VPS29																												MRPS11P1							LHX2	TTC3	NDE1	HECW2	ADCY9
FKBP3																												MRPS12							BMP2K	UNC13B	APBA2	TUB	DENND5A
ICMT																												MRPS14							2023-03-03	CTNNB1	SESTD1	MAP1A	MAML3
TIPRL																												MRPS15							VWA3B	SEPTIN10	RCAN2	TAFA2	NPAS2
SFXN1																												MRPS15P1							ADAM12	MAN1C1	SLC6A1	AC090579.1	UST
RBM17																												MRPS16							GRAMD2A	CTNNAL1	MPP2	KIRREL3	TLN1
RBL1																												MRPS16P1							AL121827.2	JUNB	CDC42BPB	AL589740.1	GNG12
NDUFS8																												MRPS16P2							AC092131.1	GOLM1	MTMR2	CCDC85A	NRIP1
MAT2A																												MRPS16P3							FOS	PCED1A	PRKN	MGAT5B	FAM78B
LRRC59																												MRPS17							AP001172.1	NUMB	CEP170	CLIP2	MMP16
PRPF40A																												MRPS17P1							AC036108.3	KHDRBS3	CNOT2	ADARB2	CC2D2B
CAMK1																												MRPS17P3							TAPT1-AS1	ADCY3	EFNA1	TMEM232	CHD9
SIRPG																												MRPS17P9							CDC14B	ANXA5	TCF4	CADM3	PTPRG-AS1
PPP4C																												MRPS18A							PITPNC1	ARHGEF12	GRIA4	PRICKLE1	SERPING1
PSMD4																												MRPS18AP1							GSN	MBOAT2	UBE4B	AC015923.1	PHC2
C3orf14																												MRPS18B							SLC25A33	ERCC1	ARHGEF2	MAGI3	SORBS3
NAP1L1																												MRPS18BP1							LINC00882	PER2	FSCN1	PPARGC1A	P3H2
ATP1B3																												MRPS18BP2							METTL7A	KLF9	AC023509.6	GPC6	LMNA
U2AF1																												MRPS18C							TBL1X	DNM1	AC009041.2	FBXO16	PRKD3
AKR7A2																												MRPS18CP4							B4GALNT4	MTSS1	ABTB2	GOLM1	OPA3
ARL6IP1																												MRPS18CP6							MICALL2	SLC1A1	KAT2B	ZNRF3	RFTN2
CSRP1																												MRPS2							NCKAP1	VAV2	AC004797.1	LINC02018	ANGPT2
PPP2CA																												MRPS21							EFHC2	ADAM9	APBB1	SLC41A2	FBN1
STMP1																												MRPS21P1							MYO6	PAM	SYT11	LZTS3	NREP
CCT6A																												MRPS21P2							AC023051.1	FILIP1L	RTN1	RFX4	ANKRD10
POLR2H																												MRPS21P3							PRXL2A	WSB1	EML2	GSG1L	SEC31A
DONSON																												MRPS21P6							BTBD19	TPST1	PPP2R3A	ACSL6	TMEM263
CALM2																												MRPS21P7							RASD1	CPLANE1	C5orf64	TTTY14	MALAT1
RPL26L1																												MRPS21P8							AL022323.4	HDAC7	FTCDNL1	MYEF2	SPACA6
C17orf49																												MRPS21P9							ZNRF3-AS1	CENPP	CNTNAP2	PLEKHA5	MIPOL1
UBR7																												MRPS22							SPAG1	P4HA1	PCDH17	PNMA2	DNMBP
SLIRP																												MRPS23							CHST3	GSE1	ENDOD1	KIF21A	FRMD6
RBBP4																												MRPS24							C1orf198	SBF2	MYO18A	PRKAA2	MGLL
LAGE3																												MRPS25							PTN	P4HB	PPFIBP2	C2orf72	CTTN
NDUFAF3																												MRPS26							CUBN	IFT81	PPP1R9A	RNF157	LASP1
DCAF7																												MRPS27							RHOBTB3	GABBR1	KIDINS220	CACNA1C	NFIB
NDUFB3																												MRPS28							RGL1	HSP90B1	PLCH2	SNX32	PLXNB2
FUT8																												MRPS30							TTC28	ARHGEF17	IFIT3	LINC00937	UGGT2
POLR2K																												MRPS31							RUFY3	TOM1L1	NTM-AS1	APBA1	MAP3K8
TOX																												MRPS31P2							PRSS23	MICALL2	WHRN	BDH1	USP6NL
MGME1																												MRPS31P4							C1S	APPL2	MPP5	KCNT2	BMPR1A
MRPL51																												MRPS31P5							ANXA1	FTX	AC116903.2	NAV1	VIM
TRA2B																												MRPS33							GLUL	VIM	AC006160.1	CDON	CNTLN
EIF2S2																												MRPS33P2							ME3	NEK6	FUT8	CATSPER2	AP000331.1
CHD4																												MRPS33P3							EFCAB6	ZFHX4	RAB3IP	TUSC3	MICU3
HDAC1																												MRPS33P4							CCDC170	CTNND1	NEGR1	LINC02693	HSDL2
PRIM1																												MRPS34							PLSCR1	NBPF14	ARPP21	LRRN1	ADAM9
ELP5																												MRPS35							DLG5	SLC22A23	AC004158.1	DPYSL2	GABBR1
ARL6IP6																												MRPS35P2							CSGALNACT1	CSAD	EPB41L2	CDH13	NCKAP5
NDUFB6																												MRPS35P3							ICA1L	LRP6	FBN1	ATL1	CCDC50
TCTEX1D2																												MRPS36							AL031280.1	ITGB1	ANKIB1	EHBP1	AL356124.1
CXCL13																												MRPS36P1							RGS22	KCTD9	PTBP2	GPRASP1	LHFPL2
SUMO2																												MRPS36P2							KIAA1211	MED13L	ZFHX4	SH3GL3	KLF9
PARP2																												MRPS36P3							CFAP43	KREMEN1	CPEB4	ITGB8	RRBP1
ELOC																												MRPS36P4							CDH11	MICOS10	KCNQ1OT1	KIAA1324	USP53
HPF1																												MRPS36P5							PDE4B	NCKAP1	NRBP2	AC093879.1	DKK3
RANGAP1																												MRPS5							LGR4	PTPN12	CPEB2	SRCIN1	FOXP1
CCT2																												MRPS5P3							BCL9	LINC01473	CAMTA1	ZHX3	TRIM13
PCNT																												MRPS5P4							THBS4	SSBP3	SAMD4B	TTC7B	AC020916.1
EEF1E1																												MRPS6							AC016907.2	JMJD1C	SSBP2	RAP1GAP2	NINL
PSMA2																												MRPS6P2							TMEM47	SOS2	GPSM2	ANO4	PDIA5
PSMB9																												MRPS6P4							RNF150	ZFYVE9	ZKSCAN1	TMEM161B-AS1	XIST
CLTA																												MRPS7							MKLN1	CHN1	AC092958.1	PTCHD1-AS	PELI2
PTMS																												MRPS9							GRID1	NFE2L1	ANKUB1	AC002429.2	SH2D3C
ROMO1																												MRRF							SYCP3	ELL2	ADD3	PPP1R13B	JADE1
RAB5IF																												MRS2							SGIP1	BCL6	LACC1	CACNB2	WIPI1
ODC1																												MSRA							CXCL14	SLC9A1	CDH8	TSC22D1	DAPK3
LYST																												MSRB2							TCF4	UCK2	BAZ2B	ABAT	WDR60
TMUB1																												MSRB3							LINC02698	PMM2	MAN2A2	FAIM2	PDE10A
POLD2																												MT-ATP6							AC103923.1	RALGPS2	SEPTIN4-AS1	MTMR7	NR2F1
RAB27A																												MT-ATP8							C1R	NAV1	IPO13	KIF3A	IFT140
APOBEC3C																												MT-CO1							ADAMTS9-AS2	SSH1	TRIM59	NEK10	SNRK
FGFR1OP																												MT-CO2							AGFG2	DENND2A	NKD1	IGF1R	ZBTB16
SRSF4																												MT-CO3							GMPR	ATP13A3	SH3GLB2	BAIAP2	AOPEP
COX5A																												MT-CYB							MSRB3	PPP1CB	DANT2	SV2A	SIK2
BLOC1S1																												MT-ND1							NADK2	ARHGAP31	GPC5	PPP4R4	PTMS
REEP4																												MT-ND2							PRKN	ANO6	FCHO1	GABRA2	SEPTIN10
TIPIN																												MT-ND3							ACSL6	AVIL	ABHD6	SPECC1	IL4R
RAD21																												MT-ND4							MAPT	COPG1	MAPRE2	GOLGA8B	CBR4
RFC1																												MT-ND4L							AASDH	EVI5	SEMA6A-AS1	FAM169A	AL008633.1
AP1S2																												MT-ND5							APOE	DLD	RALGAPA1	FAM81A	GFPT1
TOX2																												MT-ND6							AC012404.1	MORF4L2	SLF2	RGS17	PRKAR1A
NME1																												MT-RNR1							STK38L	PTPDC1	FIGN	PEG3	ADAMTSL4-AS1
C11orf98																												MT-RNR2							ZMAT3	LINC01278	ZNF462	AC106793.1	AP2A1
SNRPE																												MT-TA							AC093535.1	ADD3	AGBL1	CRMP1	INSYN2A
ENSA																												MT-TC							BDH2	CAMSAP2	ARHGAP1	SLC25A27	CORO2B
COX20																												MT-TD							SLC25A29	ATP10A	LRRC8D	AC108519.1	DCLK2
ILK																												MT-TE							NCS1	INTU	AP1S2	ABCA3	CALU
CDC25B																												MT-TF							GADD45A	GMDS	AC005009.2	ATP9A	SSBP3
LRRC45																												MT-TG							ANGPTL4	ESYT2	RAPGEF3	FZD3	PTPN21
CTPS1																												MT-TH							AP003025.2	GOLGA3	MCF2L	DKK3	NAV2
ILF2																												MT-TI							FHIT	P4HA3	DIXDC1	STMN4	SMAD5
PDLIM7																												MT-TK							OTUD7B	HECW1	AC077690.1	PID1	CTNNA1
CEP57L1																												MT-TL1							PRR5	AC007780.1	ARHGEF10	AC046134.2	FAM13A
CDC27																												MT-TL2							AQP1	DAAM2	SPART	PRRT2	MAP4K3
VDAC1																												MT-TM							PLCH1	AC017002.5	ARHGAP39	AC008591.1	UGCG
PPIG																												MT-TN							CCN1	STX5	AL591895.1	SH3RF3	NEDD9
PDIA6																												MT-TP							AC015983.2	ABCC4	CPB2-AS1	DYNC1I1	PIK3CA
TPR																												MT-TQ							ALDH7A1	CRMP1	DGKI	PDE10A	STARD9
NDUFS7																												MT-TR							FGD4	WDFY3	PLEKHA1	THSD7A	MAML2
RCC2																												MT-TS1							HHATL	SDK1	SEPTIN8	PRKAR2B	MOB1B
SRSF10																												MT-TS2							GASK1A	KANSL1L	PIGH	AL357873.1	RAPGEF4
POLR2E																												MT-TT							DCDC1	IQSEC1	EVI5L	GDPD1	SSH1
HNRNPD																												MT-TV							WDR60	NCOR2	KCNJ10	TMEM38A	RECK
ANKRD35																												MT-TW							LRRC1	SEC63	AL139317.5	NCS1	STAT3
HNRNPA3																												MT-TY							EHBP1	SEC23A	NAV1	GOLGA8A	ZBTB20-AS5
FIGNL1																												MTATP6P1							RASGEF1B	ITGB5	ZNF565	CAMKK1	SAV1
WARS																												MTATP6P2							SLC43A2	TOP1	C1orf198	THY1	ABL1
RDX																												MTATP6P3							MYOM1	TRIM22	GPR158	AFF3	VAV2
HIST1H1C																												MTATP6P4							GEM	TIMP2	PREX2	CYP46A1	TSIX
SRSF3																												MTATP6P7							ELOVL2	MALAT1	PSAT1	NR3C2	DIAPH2-AS1
HLA-DPA1																												MTATP6P9							WDFY3	KLF6	SECISBP2L	FAM184A	AC027097.2
PYCARD																												MTATP8P1							ZNF334	KIAA1671	PPM1B	CLU	SLMAP
DNAJC8																												MTATP8P2							WDR17	REEP3	AC109927.1	CHRM3-AS2	CUEDC1
ARPC2																												MTCH1							AC053527.2	MIPOL1	AC011346.1	AC006115.2	SOS2
NDUFB1																												MTCH2							CLIP1-AS1	AC007389.1	ZBTB20	NCKAP1	GNAI1
MCRIP1																												MTCP1							PRDX6	ZBTB20	TNRC6C	KCTD1	ADAM12
CYTOR																												MTERF							PER2	PPP2CB	SGMS1	CACNA2D1	EFHC1
HLA-DQA1																												MTERFD1							AL160254.1	GALNT10	LURAP1L-AS1	BSCL2	CHSY1
ARPC5																												MTERFD2							ARHGAP29	COL5A3	INPP1	RALGPS2	B3GNT2
KIF2A																												MTERFD3							CAB39L	SSBP2	NPC1	KLHL23	LIMS1
ENO1																												MTFMT							HOGA1	COPA	ZHX3	WDFY3	DLG1
EIF3A																												MTFP1							TMTC1	GBP1	2023-03-10	AC077690.1	SWAP70
EIF4H																												MTFR1							RASSF8-AS1	ARFGAP1	KIAA0556	KIF1B	FNBP1L
KPNB1																												MTFR1L							AC078955.1	DGKH	PPP2R2A	GGT7	IFT81
AKR1B1																												MTG1							MAGI3	DRAM1	AL139260.1	B4GALNT4	SHLD2
LMCD1																												MTG2							ENO1	RNF115	AL139383.1	BMERB1	NEDD4
PHPT1																												MTHFD1							MGLL	JAM3	CPQ	AC068587.4	C1S
LDHA																												MTHFD1L							PROS1	GFPT1	TPD52	LINC01551	BAZ2B
HIST2H2AC																												MTHFD2							KIF21A	SELENOS	ITGB8	EPN2	SSBP2
HLA-DQB1																												MTHFD2L							RGS6	TUT7	CLCN4	TMEM178A	TMEM241
PTPN7																												MTHFS							KATNAL2	CYTOR	C21orf91	SPIRE1	MYL6
DNPH1																												MTIF2							CAMK2B	CREM	LINC01877	CCDC3	NBPF26
ARPC5L																												MTIF3							CD44	HDGFL3	GALNT7	MPDZ	ILK
MCMBP																												MTND1P1							AF064860.1	PDXK	HSD17B4	GDAP1L1	TBC1D12
LAG3																												MTND1P10							SRGAP3	ANKRD10	BACH2	CMYA5	SH2B3
SPCS2																												MTND1P11							CLYBL	PRPSAP1	NUTM2A-AS1	CC2D1A	ZNF586
HNRNPR																												MTND1P12							LINC00271	ATP1B3	ITPKB	EPB41L1	SPRED2
SLC1A5																												MTND1P13							SEMA3B	SIL1	MBOAT2	SATB2	IGF1R
HIST1H2AG																												MTND1P14							AL136366.1	DLG5	BMP8A	ZNF532	STK39
AHI1																												MTND1P15							SCGB2B2	RAPGEF5	CATSPERG	TRPC1	SPECC1L
UBA2																												MTND1P16							TMEM220	TRMT11	WDR20	PALM	LINC01278
CYCS																												MTND1P17							GDA	ARFGAP3	MCF2L2	ENAH	REEP3
COX17																												MTND1P18							TTYH1	ASPH	ENOSF1	FAM135A	AFF4
DGKH																												MTND1P19							SLC13A3	PRKN	ELL2	TTBK1	MLLT3
SNRPF																												MTND1P2							AL139260.1	SLC25A43	AC106791.1	STRBP	ARHGAP26
UBE2L3																												MTND1P20							TJP1	HS6ST1	AP001442.1	FADS3	CPT1A
ZNF207																												MTND1P21							COL4A6	SOBP	AC100800.1	FRAS1	CENPP
MSH6																												MTND1P22							STOM	PLSCR1	DNAJB2	KIFC2	HDAC7
VOPP1																												MTND1P23							AL357153.2	AHDC1	DSEL	FER	ATP2A2
SLC2A8																												MTND1P24							SSBP2	ARHGAP32	PPP1R12B	NDRG4	MIRLET7BHG
TESC																												MTND1P26							HTRA1	ANO10	ENAH	ALK	SOBP
NUCB2																												MTND1P27							APCDD1	SYN3	AL117381.1	MEF2C	OSBPL9
DBI																												MTND1P28							DZIP3	ARRB1	USP31	AC023282.1	IFI44L
SUMO1																												MTND1P29							PFKFB3	WDR60	APOA1-AS	RFPL1S	CECR2
NHP2																												MTND1P3							NRG2	RORA-AS1	ENOX2	GRIK1	CNNM2
PHB																												MTND1P30							SEC14L2	GRB10	PDK1	SNCA	DMPK
AURKAIP1																												MTND1P31							BBS2	PIK3CA	DYNC1I2	DYNC2H1	ARHGAP5
RBX1																												MTND1P32							ELN	ZBTB20-AS5	ZNF638	HOOK2	SCMH1
CCT5																												MTND1P33							C19orf18	SLC7A14	VPS35L	PKD1	CCNL2
DCXR																												MTND1P34							TP53BP2	SCFD1	TRPC1	AK5	CDH13
UQCRFS1																												MTND1P35							LRP4	TBC1D4	AC006355.2	ABCB9	MAST2
SQLE																												MTND1P36							DIP2C	MTMR2	PMP22	PTPRB	NUMB
TMEM14B																												MTND1P4							OSGIN2	FBXL13	PSMG4	CTDSPL	EVI5
NDUFS6																												MTND1P5							SPON1	MTUS1	GATAD1	SLC24A3	ZBTB20
SPTSSA																												MTND1P6							AC104827.1	PRKAR1A	SOBP	SPARCL1	AF117829.1
CTLA4																												MTND1P7							SMAD6	UBE2Q2	MICU3	CFAP46	MRTFA
SH2D1A																												MTND1P9							TMEM132A	BICD1	PWRN1	NPDC1	STOM
PDCD1																												MTND2P11							GPC4	NCOA1	EGLN3	MICAL3	PCCA
TWF2																												MTND2P12							DNAH6	TMEM39A	ZNF365	SPAG16	FAM91A1
ERH																												MTND2P14							AC119673.2	DLGAP4-AS1	CDK6	KCNMA1-AS1	CSRNP3
PPM1G																												MTND2P15							LINC01551	RCL1	AL031587.2	MIPOL1	FHL1
CCT8																												MTND2P16							SPART	CHIC2	SPIRE1	PRXL2A	MTHFD1L
SCMH1																												MTND2P17							DOCK4	DCAF6	SEMA4B	ROBO1	PRICKLE2
MAGOH																												MTND2P18							PSD2	CCDC57	GLCE	CHN1	TMOD3
SRSF2																												MTND2P19							SNCAIP	NBPF15	ZBED3-AS1	AKAP12	SCFD1
RAD23A																												MTND2P2							IGF1R	DENND5A	SLC23A2	ITGA9-AS1	NIPAL2
CD74																												MTND2P20							CFAP46	AC008014.1	TRIM13	RAB6B	CHST15
CTSB																												MTND2P21							NMD3	LINC01376	AC092691.1	AFAP1	MRTFB
CDCA7L																												MTND2P22							SPTBN1	ZRANB2	ASRGL1	TNRC6A	NAB1
SEC11A																												MTND2P23							AL157911.1	SH3RF1	CYREN	ENOX1	ZBTB38
RBPJ																												MTND2P24							HS6ST1	GK5	ZDHHC20	AACS	PTPN9
DCTPP1																												MTND2P25							ARMC2	SLC20A1	VXN	IGSF11	ETV6
CAPZA1																												MTND2P26							GPR173	GLRX	BMERB1	ALG1L9P	FARP2
UBE2N																												MTND2P28							GSE1	PLEKHA6	SPSB1	NEURL1	TMEM184B
PSIP1																												MTND2P29							ACP6	NCOA7	FERMT2	AHI1	PPME1
NDUFA2																												MTND2P3							PBX1	SESTD1	S100B	RTN3	IFI44
ANP32A																												MTND2P30							ALK	TMEM241	STK3	NOS1	AC098829.1
RNPS1																												MTND2P31							JAM2	TSPAN5	ROGDI	NKAIN2	NCOA3
HNRNPM																												MTND2P32							DEPP1	SRSF11	RUFY3	RAB3IP	GBE1
DCTN3																												MTND2P33							ARHGAP5	TBC1D23	AL049828.1	SHANK3	TTC19
AHCY																												MTND2P4							RBFOX2	ARF4	RERE	NME5	PER1
PSMD8																												MTND2P5							SERPING1	CTNNA1	LINC00342	AC008269.1	CRYBG3
IFI16																												MTND2P6							NPHP1	CDKL1	MIR2052HG	KLHL29	ZNF69
CDC7																												MTND2P7							VSIG10	FOXP1	CTNNA1	FAM171B	ZMYM4
RCC1																												MTND2P8							CAMTA1	LONRF1	AP000462.1	PITPNM3	SMC6
TMEM18																												MTND2P9							MRTFB	RRAS2	FAM114A1	CAP2	SMARCA1
UBL7-AS1																												MTND3P1							SMARCA1	SEC61A1	DNAH17	RYR3	USP12
SDF2L1																												MTND3P10							TOGARAM2	AC106845.1	STXBP3	SLC2A11	FANCC
PRKDC																												MTND3P2							RAVER2	AL139317.5	AL161430.1	AC107223.1	TENT5A
SF3A2																												MTND3P3							CDH23	AC012459.1	SLC39A11	AC239809.3	CRMP1
MDH1																												MTND3P4							SLC25A43	BMPR1A	NIPAL3	LHFPL3-AS1	AC011092.2
NDUFA12																												MTND3P5							SASH1	PML	RALGDS	SMOC1	NAP1L1
IFNG																												MTND3P6							TCTN1	DTWD1	KLHL2	TIAM1	TRPC1
MYL6																												MTND3P7							LINC01285	APOLD1	KDM6A	GRB10	TOM1L1
CCT4																												MTND3P8							DIXDC1	CACNB4	AC010359.3	CPLANE1	MAP4K4
IMPDH2																												MTND3P9							ERBB2	CCDC7	RDX	HSPA4L	AC008014.1
CD151																												MTND4LP1							PHKA1	BAZ2B	HDAC11	BEND6	AVEN
RALY																												MTND4P1							LIX1-AS1	SPAG9	CBFB	ZSWIM5	WARS2-AS1
HMGA1																												MTND4P10							FNBP1L	SH3PXD2B	STMN1	CFAP221	AL158152.1
HLA-DMB																												MTND4P11							ABCA3	AC087286.2	UNC5B	KCNIP1	P4HA3
NDUFA6																												MTND4P12							LINC01567	COPB1	SLC13A3	ADCY9	PML
NOP10																												MTND4P13							MXI1	LENG8	TTC7A	SYT11	ZCCHC14
THRAP3																												MTND4P14							TPP1	SIK2	HDAC4	ANTXR1	FLVCR2
GSTP1																												MTND4P15							AC046134.2	TSC22D3	CPEB3	PYGB	SGPL1
UQCRQ																												MTND4P16							NDRG4	ACO1	TIMP2	UGGT2	UBE2E3
SF3B5																												MTND4P17							IFFO2	XXYLT1	SLC27A1	ATP6V0A1	CDKL5
PARP1																												MTND4P18							MSRA	ENOSF1	CSMD2	SHC2	FGF1
HMGN3																												MTND4P19							TMEM164	SF3A3	BBS9	FAM27C	KPNA5
ID3																												MTND4P2							TRPC1	DYNC1H1	USP40	OLFM2	CD302
HP1BP3																												MTND4P20							EGFR	FOCAD	ATP9A	GPR137C	FAM126A
AIP																												MTND4P21							MRVI1-AS1	TLN2	SNCA	TAFA1	AC087286.2
CYB5A																												MTND4P22							AC008957.1	ABHD5	NTRK2	GNAO1	CBL
CCT7																												MTND4P23							TGFBR3	FAM20C	SH3RF1	CES4A	INVS
RBMX																												MTND4P24							KCNMB2	NIPAL2	ZSWIM6	AC006504.5	FXYD6
LRMP																												MTND4P25							HES1	ABL2	ACYP2	SOBP	SLC25A24
BSG																												MTND4P26							RFX3	PLCE1	AL034405.1	RFLNA	ATXN2
HLTF																												MTND4P27							LAMC1	RNF150	SUN2	SAMD12	SETD5
PRDX5																												MTND4P28							CAPN2	ZNF420	TOGARAM1	COLQ	AEBP2
NDUFB10																												MTND4P29							DRC1	ZNF362	FARP2	TIMP3	MBD5
ZNF706																												MTND4P3							SMO	ANKRD26	POGZ	ITGA9	ARID5B
DDX39B																												MTND4P30							NIM1K	KSR1	TTC6	CEP126	GNB1
YWHAQ																												MTND4P31							FADS3	TMEM43	SHROOM1	RGS12	AKT3
DRAIC																												MTND4P32							ARMC3	PRKD3	CLIP4	AC090945.1	NPHP3
DDOST																												MTND4P4							ANKDD1A	DAB2IP	MEGF9	RNF144A	GLS
ATP5PF																												MTND4P5							KIAA1958	CEP290	NLK	KCNK10	HDAC5
NNT																												MTND4P6							AASS	TSC22D1	ZNF532	IL1RAP	CUX1
APOBEC3H																												MTND4P7							ATP2B4	PDE5A	PCBP4	BTBD8	GALNT18
PPP1CC																												MTND4P8							DLC1	INTS6	MPDZ	ST7	WARS2
HNRNPF																												MTND4P9							NINL	ZNF516	CAMK2N1	ACOT7	SEC63
ATP5MF																												MTND5P1							CPNE8	CTDSP2	MAX	TRPM3	PLEKHA8
HIST1H1E																												MTND5P10							FAM181B	RIMKLB	TMEM140	AC002460.2	KANSL1L
HAVCR2																												MTND5P11							AC105916.1	MON2	PLPP1	DOCK7	MYO9A
WWOX																												MTND5P12							UFL1-AS1	HIPK3	SRPK2	SDK1	NUTM2A-AS1
TXN																												MTND5P13							PPP1R42	STXBP5	LRIG1	AC098588.3	SLAIN2
MZT2A																												MTND5P14							LCAT	ZYX	LARGE1	ABCA10	CALCOCO2
SLC1A4																												MTND5P15							GATD1	STK24	PCGF5	ABLIM3	ZFAND3
PSME2																												MTND5P16							MT1E	ATP8B1	AC009974.2	CLSTN3	SMG6
DUSP4																												MTND5P17							URB1	TTLL3	CPPED1	PRKCZ	CLOCK
EIF1AX																												MTND5P18							PLEKHB1	RAB1A	YPEL2	NFIX	PTPRA
PSMA5																												MTND5P19							NRBP2	ZHX3	CERS4	ACAP3	ABCA9
SRI																												MTND5P2							FAM167A-AS1	AOPEP	TJAP1	LRP12	TBC1D4
CORO1A																												MTND5P20							SIRPA	ZFAND5	SLC6A6	AP001266.2	ADARB1
UBE2I																												MTND5P21							FAM135A	NR6A1	SAMD4A	AC007098.1	FAM171A1
NDUFAB1																												MTND5P22							CST3	PELI2	CHRM5	ZDHHC14	MAGI3
PSMB6																												MTND5P23							CRIM1	TBC1D32	DPY19L1	TP53BP1	CREB3L2
CD63																												MTND5P24							LINC02062	PARP14	SPAG9	GPC1	GBP1
TOMM5																												MTND5P25							ANGPT1	SF3B1	WASHC5	BRSK1	GATAD2A
RHOA																												MTND5P26							RASGEF1A	AC009120.2	EMILIN2	FAM66D	ARMC9
GPI																												MTND5P27							SGCD	MTA3	RUFY2	PDE4DIP	ODF2L
PRDX6																												MTND5P28							U91319.1	ALS2	C21orf62-AS1	NEDD4L	CC2D2A
TPM4																												MTND5P29							AC026316.5	SLC2A3	ATF7	SCRN1	PICALM
SUB1																												MTND5P3							PRDM5	SCARB1	DAPK2	GPLD1	RNF217
ATP5PB																												MTND5P30							HHIPL1	MBD5	LINC01006	BCR	SLC44A2
KCNQ5																												MTND5P31							WDR11-AS1	ARCN1	FDFT1	SPOCK3	ARHGEF11
GDI2																												MTND5P4							DUSP1	RANBP17	AC026316.5	RPS6KA2	RAP2A
RAC1																												MTND5P5							GNG12	MRTFA	AC107884.1	MOK	PTBP2
SRP9																												MTND5P6							DPY19L3	COG3	ATP11A	ENC1	AKAP8L
HLA-DPB1																												MTND5P7							ITPKB-AS1	SRRM2	JADE3	IRAK1BP1	MICAL2
PSMB3																												MTND5P8							BCR	HDLBP	LRRC8B	TTLL11	SLC25A25
AIF1																												MTND5P9							MAMDC2-AS1	KDM5B	NEAT1	MAP3K13	AL157392.3
PPP1CA																												MTND6P1							SOBP	CPEB2	NAPEPLD	GPHN	AL450384.2
PARK7																												MTND6P10							ECT2L	DLGAP4	ST8SIA5	LDB2	SLC25A43
COX6A1																												MTND6P11							CEP126	ERC1	OSBPL9	ENO2	MNAT1
POMP																												MTND6P12							RIMKLB	FER	AC135050.3	TMEM163	NDUFS1
FKBP1A																												MTND6P13							MBOAT2	PSMD1	LRP4-AS1	DOK6	ST3GAL2
EIF5A																												MTND6P14							RGS11	PTPRS	MPC1	SLC8A1-AS1	BTBD9
GBP1																												MTND6P15							AIG1	PPP2R3A	AC007262.2	GARNL3	CDKL1
P4HB																												MTND6P16							CALM2	ATP9A	SDCCAG8	VLDLR-AS1	FOXO3
PPA1																												MTND6P17							SERPINB6	WBP1L	ZBTB20-AS5	CLSTN1	AIG1
CCT3																												MTND6P18							GRIK5	AC046134.2	FAM53B-AS1	CTTN	RIMKLB
MYO7A																												MTND6P19							KBTBD12	GOLGB1	AC007364.1	APC	TTLL5
AL138720.1																												MTND6P2							RNF43	PCNX4	ACTN4	TMEM14B	RHOQ
PSMA6																												MTND6P20							DENND5B	TFG	DPF3	MAPRE3	ANKLE2
IFI6																												MTND6P21							RFX3-AS1	PTPRE	PEAK1	SOGA3	RYK
HSP90AA1																												MTND6P3							SPRED2	TP53BP1	CCNY	GAS7	HIPK2
EWSR1																												MTND6P4							TTLL3	AC027097.2	PHC2	PPFIA2-AS1	PTPRS
CD59																												MTND6P5							NR3C2	IPO9-AS1	UBR3	ANKFN1	ACADVL
BUB3																												MTND6P6							BAIAP2	SRSF6	ITCH	PREPL	STX18
PSMA7																												MTND6P7							LSAMP-AS1	NPHP3	APC2	AL049828.1	TCF12
ATP5F1C																												MTND6P8							PADI2	STK38L	CYP2U1	AC073332.1	PPP1R12C
RTRAF																												MTND6P9							BCKDHB	POLR2A	ANKRD36C	SLIT3	PUM1
ATP5MC1																												MTO1							TNS1	POMZP3	AC090517.5	DPYSL3	CRTC3
SFPQ																												MTPAP							RNF217	TGFBR1	AP000892.1	AL357153.2	CEP89
NEDD8																												MTRF1							AL512422.1	CEP162	MAP1A	JAKMIP2-AS1	AC009505.1
SET																												MTRF1L							AC002460.2	DNAJC10	FANCL	NAALAD2	GPR173
NDUFC2																												MTRNR2L1							COL21A1	NFE2L2	SHMT1	MAOB	FTX
NDUFV2																												MTRNR2L10							SSPN	CAMK1D	BBX	ZDBF2
PA2G4																												MTRNR2L11							ZBTB20-AS5	TMEM87B	WSCD1	AIG1
SEM1																												MTRNR2L12							MT3	SMAD5	SVIP	TRAF3IP2-AS1
HSPD1																												MTRNR2L13							ZFP36	SHLD2	PPP1R21	CEP112
HSP90B1																												MTRNR2L2							AC097537.1	SGPL1	AL391840.1	CTIF
NDUFB11																												MTRNR2L3							SPAG16	NEO1	FOXN2	WDR60
HLA-DRB5																												MTRNR2L4							CSRNP3	CPD	ANKRD36	AC044781.1
DYNLL1																												MTRNR2L5							SYT11	ACADVL	LAP3	MICU3
LSM7																												MTRNR2L6							AMZ2	PTPRA	IQGAP1	PPIP5K1
MICOS10																												MTRNR2L7							CAMK2G	LYPLAL1	FMO5	NETO2
FAM3C																												MTRNR2L8							AHDC1	GMDS-DT	TMEM117	AL445250.1
SRRM1																												MTRNR2L9							VIM	SPIDR	HEG1	SOGA1
SF3B2																												MTX1							GNA12	STAT2	STRN	AC022146.2
POLR2L																												MTX2							EGLN3	SQSTM1	AC068481.1	SSX2IP
TAP1																												MUL1							FER	GBE1	ZNF451	CXADR
NDUFB2																												MUT							WBP2	COG7	MAGI2-AS3	SCG5
NDUFB4																												MUTYH							NQO1	SFXN5	LRP6	ZNF385D
RPL22L1																												NADK2							USP54	SFPQ	MOSPD2	ABCA5
WDR1																												NAGS							C3orf70	DPY19L3	ATE1	FAM110B
TNFRSF9																												NARS2							CDKL3	ELMSAN1	TMED10	DAAM1
CLEC2D																												NBR1							CAPS2		NFIB	IRS2
HNRNPU																												NCEH1							CCDC171		ZC2HC1C	KLHL7
XRCC6																												NCOA4							CTTN		SPTLC2	AC079781.5
MZT2B																												ND1							FBXO2		ZHX2	EPB41L3
APOBEC3G																												ND2							PDE4DIP		PRTFDC1	C12orf40
PLP2																												ND3							SPECC1		GXYLT2	ZNF704
RBM8A																												ND4							TTC23		NCOA6	PGM2L1
TMEM258																												ND4L							CYSTM1		MYO5A	CLASP2
HSPE1																												ND5							C2CD2		AL513327.1	NPIPA1
PSMB8																												ND6							CAMSAP2		AL590999.1	SPTAN1
COPE																												NDUFA1							ZNF608		CHST3	ANKRD26
PSMA1																												NDUFA10							ZNF19		RPS6KA5	ZNF540
H3F3A																												NDUFA11							PDPN		TNKS	AFDN
CCL3																												NDUFA12							LTBP3		NCOA7-AS1	RNF24
UNG																												NDUFA13							ALG14		ASPHD1	GSTA4
TRAPPC1																												NDUFA2							AC107072.2		ITPRID2	CAMK2G
CD8B																												NDUFA3							TLE1		SVEP1	CDC25B
COX7B																												NDUFA4							FEZ1		TMEM135	HPRT1
CKLF																												NDUFA5							TIMP3		MINK1	UPF3A
XRCC5																												NDUFA6							MYH14		AC022146.2	ZNF318
ARHGDIA																												NDUFA7							PHACTR3		ACER3	GAS8
ACTR3																												NDUFA8							WDR78		LINC00240	TMEM132C
BST2																												NDUFA9							TRIO		RILPL1	PPM1L
SMCO4																												NDUFAB1							ECE1		ZNF189	LINC01278
ATP5F1A																												NDUFAF1							AC138627.1		RNF13	KCTD3
CSNK2B																												NDUFAF2							CCDC191		DENND5B	CFAP36
HIST1H1D																												NDUFAF3							ZNF532		BAALC	ACTR3B
PTGES3																												NDUFAF4							ULK4		CRB1	EPHA4
UBB																												NDUFAF5							DEAF1		NF1	ARHGEF11
SEC61B																												NDUFAF6							SHISA5		PRSS48	LIMCH1
EID1																												NDUFAF7							PRNP		USP32	PTPRE
RPS27L																												NDUFB1							KIF9-AS1		SELENOW	CCDC171
SLC25A3																												NDUFB10							AP002336.2		CEP97	ZFYVE28
GZMB																												NDUFB11							PFKP		ATG13	EFR3B
APOLD1																												NDUFB2							TIPARP		NFKBIZ	CTNNAL1
KHDRBS1																												NDUFB3							PCDH9-AS4		PHACTR4	WDR11-AS1
ITM2A																												NDUFB4							EVA1C		TRPC4AP	CPEB4
CLIC1																												NDUFB5							MAMDC2		DENND2A	UBE2O
ATP5MPL																												NDUFB6							LINC01473		AUXG01000058.1	IQSEC2
RYR2																												NDUFB7							CABCOCO1		AL021707.1	TYRO3
ARF5																												NDUFB8							AL589740.1		LIFR	SMARCA1
ARPC4																												NDUFB9							LINC00598		L3MBTL1	AC092691.3
HNRNPA0																												NDUFC1							IFT88		RNF141	RAB40C
ATP5PO																												NDUFC2							AP000962.1		PAQR8	RUFY3
PRELID1																												NDUFS1							DNAH5		ILKAP	ZNF248
ANXA2																												NDUFS2							HEPH		SH3PXD2A	FBXL2
LINC02446																												NDUFS3							TKT		NASP	TAPT1-AS1
VCAM1																												NDUFS4							B3GLCT		WDFY2	DNAH6
UQCR10																												NDUFS5							AC100800.1		AMBRA1	NDRG3
EIF4A1																												NDUFS6							FAM227A		CADM4	RAB11FIP3
COX6C																												NDUFS7							HS3ST3A1		RGCC	MGAT3
HNRNPC																												NDUFS8							ITSN1		MIRLET7BHG	NPAS2
PSMB10																												NDUFV1							GASK1B		CRADD	TARBP1
NDUFA4																												NDUFV2							CTIF		AC078881.1	PABPN1
ATP5F1B																												NDUFV3							AP003464.1		KLF3	CAMK2N1
ATP5IF1																												NEU4							CCDC144A		BCL2L14	PKP4
UQCRH																												NFS1							FAM171A1		BTD	PHF21B
LGALS1																												NFU1							TMPRSS5		ZBTB47	CASTOR2
PSMB1																												NGRN							DAB2IP		HOOK3	CCDC30
NDUFA13																												NIF3L1							ARSJ		PTPN11	AMZ1
NDUFA11																												NIPSNAP1							SLC20A2		SLC38A9	ARMCX5-GPRASP2
PRDX1																												NIPSNAP3A							ST6GALNAC5		LGALS3BP	NT5DC3
CD8A																												NIPSNAP3B							EPS8L2		HBS1L	CPEB1
ATP5MD																												NIT1							FAS		IPO9-AS1	TSBP1-AS1
PRDX2																												NIT2							DMGDH		EFR3B	LINC01414
SEPTIN7																												NLN							SLC15A2		RMC1	SMAD1
SELENOH																												NLRX1							ST3GAL5		PRKCZ	ZNF821
TPM3																												NME3							BRINP3		KLHL24	SYNGAP1
NDUFA1																												NME4							DENND5A		APPBP2	ZNF667
ELOB																												NME6							SEMA6D		ENTPD3-AS1	MRAS
ARPC1B																												NMNAT3							CX3CL1		GLIPR2	LARP1B
LSP1																												NNT							SFTPD		SLC11A2	NECTIN3
KIR2DL4																												NOA1							AC017101.1		EVI5	PXYLP1
PGK1																												NRD1							AC002069.2		ADD1	C3orf70
ATP5MG																												NSUN3							SMC5-AS1		ADSS	STK32A
CALR																												NSUN4							PARVA		DLEU2	CDH8
VIM																												NT5C							CDIP1		PSRC1	MAPKBP1
COX7A2																												NT5DC2							HOMER2		PNPT1	MEIS3
LCP1																												NT5DC3							C16orf89		AGO2	CNNM2
NKG7																												NT5M							TJP2		VAPA	SULT1A1
PCBP1																												NTHL1							LAMB2		DEPTOR	IL3RA
PCBP2																												NUBPL							AP003025.1		RAPGEF6	AL160254.1
SERBP1																												NUCB2							KNDC1		LURAP1L	CORO2B
TUBA4A																												NUDT13							LINC00159		SNX29	ZNF365
CAPZB																												NUDT19							SOX5-AS1		MIR4300HG	ANKRD6
CCL4L2																												NUDT2							PPP2CB		NIPA1	ATP1B1
ITM2C																												NUDT5							AC040168.1		ESRRG	KCNN3
CAP1																												NUDT6							PLEKHA4		AC242426.2	SUN1
HNRNPK																												NUDT8							NTNG1		GCA	MRTFB
COX6B1																												NUDT9							LCNL1		MDGA2	CDC14B
LY6E																												OAT							ARHGEF12		CPLANE1	EPB41L5
SOD1																												OBSCN							MTHFD1L		TOB2	RALGPS1
HNRNPA1																												OCIAD1							EGR1		CD46	PRKCE
UBL5																												OCIAD2							QKI		AC053527.2	GULP1
PPDPF																												OGDH							CHN1		EPB41L1	PIP5K1B
NME2																												OGDHL							PEBP4		LINC01473	LINC02062
RAC2																												OGG1							ADHFE1		VPS13C	ARMC9
SRP14																												OMA1							ALDH1A1		PIGU	SLC13A3
NCL																												OPA1							AFDN		MTERF1	GFPT2
PPIB																												OPA3							SPTAN1		YWHAQ	PKIG
ARPC3																												OSBPL1A							PTPN21		PIR	CHSY3
TMBIM6																												OSGEPL1							DPH6		APBA1	EML1
GZMA																												OTC							HGF		COL10A1	HFM1
SERF2																												OXA1L							ARHGEF11		BCL2L1	CRPPA
TMSB4X																												OXCT1							GABBR1		PPP2R5A	CCDC136
MIF																												OXLD1							LONRF2		AC015923.1	VGLL4
HINT1																												OXNAD1							PTPN9		SNX1	SPATA6L
CTSW																												OXR1							AHI1		UGDH-AS1	MGST1
ATP5MC2																												OXSM							TRAK1		GTF2I	TTC8
HSPA8																												P4HB							AKAP12		IBTK	TTC21B
SH3BGRL3																												PABPC5							CD81		IGF1R	MGLL
NPM1																												PACSIN2							IQCH		GTDC1	ENSA
HSP90AB1																												PAICS							CC2D2A		PAXBP1	B9D1
																												PAK7							AL139317.5		ARHGAP5	DOK5
																												PAM16							AC107021.1		MYCBP	STAG3
																												PANK2							TTC8		INVS	DNAH9
																												PARK7							VCL		BCAS3	AC104827.1
																												PARL							SPIRE1		ATXN2	NELFA
																												PARS2							FKBP10		CDK5RAP2	THRA
																												PC							GPC6		CYLD	CSGALNACT1
																												PCBD2							ADAM23		AL360091.3	JAKMIP3
																												PCCA							PIR		PKD2	AP002370.2
																												PCCB							NPAS2		ZMIZ1	ABI2
																												PCK2							RFTN2		PLIN3	HABP4
																												PDE12							ALDH2		AL109824.1	KLHL4
																												PDF							MFSD2A		ZNF280D	C11orf49
																												PDHA1							IPO9-AS1		KIF21A	SERGEF
																												PDHA2							PLPP1		CTIF	SH3D19
																												PDHB							MRAS		UBE2Z	L2HGDH
																												PDHX							SLC27A1		ANXA4	FBXL18
																												PDK1							RHPN1		GPR137C	AC040168.1
																												PDK2							NFASC		SGCE	AC005225.2
																												PDK3							CCS		PACC1	ARHGAP39
																												PDK4							ENDOD1		TTYH1	EFCAB6
																												PDP1							BMPR2		LINC00534	PDE4D
																												PDP2							AP001825.1		RNH1	CCDC144A
																												PDPR							DGKD		AC046134.2	LINC02821
																												PDSS1							PRKCA		NMNAT3	TBC1D32
																												PDSS2							GIPC1		ZNF397	PRKD1
																												PET100							ZBTB20-AS1		ADAMTSL3	FGFR1
																												PET112							ARRDC4		GAS2	TTBK2
																												PET117							ZNF345		FAM228B	PLD5
																												PEX11B							FAM66D		FAM171B	AL683813.1
																												PGAM5							SLC14A1		SIK2	AF117829.1
																												PGS1							SOX13		SMIM14	AC009041.2
																												PHB							HACD3		ATP6V0A1	ARHGEF28
																												PHB2							AK4		CDKL5	MPP6
																												PHYH							ANKRD6		CCDC122	PRKACB
																												PI4KA							IFT43		LINC00486	REPS2
																												PICK1							PIPOX		TPST1	FBXO21
																												PIF1							AC079142.1		POC1B	NECAB1
																												PINK1							MPDZ		PPA1	SH3BGRL2
																												PISD							ZNF337-AS1		MINDY2	PLEKHA1
																												PITRM1							EPB41L4A		STARD7	RAI1
																												PKLR							SYBU		EML1	DLG5
																												PLGRKT							USP53		COPA	ZDHHC21
																												PMAIP1							PHLPP1		KIAA0232	SSBP2
																												PMPCA							SPRY2		SMURF1	CSRNP2
																												PMPCB							AC008269.1		ZMAT1	MAP4K3-DT
																												PNPLA8							NTM-AS1		WASF1	KIFAP3
																												PNPO							PAXBP1		DPH6	GNB5
																												PNPT1							VGLL4		HDAC9	CADPS2
																												POLDIP2							MEGF9		MON2	CRTC1
																												POLG							ALOX12-AS1		OMG	RAB11FIP4
																												POLG2							WBP2NL		SLC4A8	ZER1
																												POLRMT							CPNE4		PIK3CB	CLDN12
																												PPA2							C12orf56		DMXL1	GLDC
																												PPIF							SHISA6		TMOD2	USP11
																												PPM1K							SOD2		ASXL3	BICD1
																												PPOX							PLCD1		PLD5	STARD4-AS1
																												PPTC7							SCML1		LINC00511	USP49
																												PPWD1							CLIC4		LINC01572	NEK11
																												PRDX2							VCAN		MAP7D1	PGAP1
																												PRDX3							OLMALINC		NLGN4Y	MNAT1
																												PRDX4							AP001831.1		CYBRD1	LRP11
																												PRDX5							AC113414.1		PER3	AC004039.1
																												PRDX6							LYVE1		TTL	GLIS3
																												PRELID1							SORBS3		FBXL18	CNIH3
																												PRELID2							A2ML1		ALAD	EXD3
																												PREPL							SEMA4B		CLASRP	APC2
																												PRODH							TTC7B		RPS6KC1	ZNF25
																												PRODH2							AL157871.4		FAIM2	ZNF827
																												PROSC							RHOBTB2		INPP5A	ARHGAP20
																												PRSS35							DCAKD		STX4	AC119673.2
																												PSMA6							AC097515.1		UGGT2	TPCN2
																												PSTK							WIPF2		PTPRE	QTRT1
																												PTCD1							SCN8A		CEP70	ATP13A2
																												PTCD2							C11orf49		FAR1	GNG12-AS1
																												PTCD3							PHKG1		MAST3	AL391840.1
																												PTGES2							SNED1		STAMBP	CELF2-AS2
																												PTPMT1							MYEF2		DIPK1A	ZNF345
																												PTPN4							TMEM41B		KLHDC1	P2RX7
																												PTRH1							AC026356.2		FAM13B	MEGF8
																												PTRH2							RNF215		ZRANB2-AS2	PHLPP2
																												PTS							ITPKB		NOCT	EEF2K
																												PUS1							TSC22D1		PIM3	ZCCHC14
																												PUSL1							AGPAT5		MGAT3	LINC00486
																												PXMP2							UBC		NDST1	MSH2
																												PXMP4							AC007098.1		NUP214	MBOAT2
																												PYCR1							AL591043.2		PLS3	IPO9-AS1
																												PYCR2							PCGF5		PLEKHH2	MYO9A
																												PYURF							RNF19A		AC118549.1	AC092902.4
																												QDPR							TTC4		RABGEF1	TRMT11
																												QRSL1							ZBED3-AS1		TMEM230	TCAF1
																												QTRT1							LMNA		DUSP16	FAM13C
																												RAB11FIP5							RAI14		LINC01184	MXI1
																												RAB24							SPOP		ANKRD23	TNNI3K
																												RAB32							CPEB2		KIF16B	AUTS2
																												RAB35							DPY19L1		ABCA6	JAZF1
																												RARS							ZFYVE28		TMEM87A	WIPF2
																												RARS2							PAQR8		STX16	TRMT9B
																												RBFA							VAT1L		NBPF12	KHDC1
																												RCN2							SYTL4		PARP9	PRKCI
																												RDH11							RAB4A		ANKRD36B	FBXL13
																												RDH13							GFPT2		NCOA1	PCBP1-AS1
																												RDH14							MMP28		DYNC1LI2	MAK
																												RECQL4							ABCC3		HIBCH	NME7
																												REXO2							ZSCAN5A		PCCB	H2AFY2
																												RFK							LINC00960		ECPAS	GNA12
																												RHOT1							TUSC7		RASSF8	SLC9B2
																												RHOT2							RHBDL2		ATP6AP1L	C11orf80
																												RMDN1							HS2ST1		AKNAD1	ZNF577
																												RMDN3							ASAP2		IWS1	DNAH7
																												RMND1							CA8		SCGB2B2	NDFIP2
																												RNASEH1							BCL2L14		CDH2	ZC2HC1A
																												RNMTL1							AL078459.1		CALM2	TIAM2
																												ROMO1							ZNF717		MLH3	NUMBL
																												RPIA							AC137494.1		TOM1L2	PCDH17
																												RPL10A							CTNND1		SEPTIN10	GNAI1
																												RPL34							CHKA		TRMT13	PRSS23
																												RPL35A							TTLL9		LTN1	EPB41L2
																												RPS14							AC119674.1		SWT1	MTA3
																												RPS15A							UGGT2		ALOX12-AS1	NPTN
																												RPS18							PLEKHA6		WDPCP	PRPF40B
																												RPUSD3							KCNJ10		APIP	CDKL1
																												RPUSD4							CAPS		FAM177A1	KLHL3
																												RSAD1							AC023095.1		PDE6B	LRP6
																												RTN4IP1							VWA3A		UBE2E3	PAK1
																												SAMM50							SRPX2		CCNYL1	AC079447.1
																												SARDH							ELP4		UHRF2	ASB3
																												SARS2							ZNF827		ALDH3A2	GFAP
																												SCCPDH							LINC01937		KIZ	ZNF197
																												SCO1							TCEA3		NCKAP1	ARHGEF9
																												SCO2							PPFIA2		ACAP3	LGI4
																												SCP2							CHST9		CTBP2	ANKRD36B
																												SDHA							FADS1		SOGA3	ANO10
																												SDHAF1							LRP5		UBE2R2	CCDC57
																												SDHAF2							FAM182B		TNNI3K	RIMKLB
																												SDHB							PLA2G12A		ANKRD28	PKIA
																												SDHC							RAB34		EMC2	HULC
																												SDHD							NUDT4		ICK	SCAI
																												SDR39U1							SYNC		NRG2	GPR173
																												SDSL							LRP10		CD47	PPP2R3A
																												SECISBP2							UBTD1		KLHL28	MAMLD1
																												SELO							LRP6		CXXC5	TSGA10
																												2023-09-04							RORA		BTRC	PKN2-AS1
																												SERAC1							CHL1-AS2		SEC14L2	ZNF713
																												SERHL2							ZMIZ1		LGR4	LMO7
																												SETD9							ZNF248		GRIK4	P4HTM
																												SFXN1							MYH10		BNIP3L	BTRC
																												SFXN2							CATSPERE		TSHR	SPDYE3
																												SFXN3							CPEB4		SERAC1	CCDC92
																												SFXN4							TBC1D19		RCOR3	CEP70
																												SFXN5							BHLHE41		DNM1L	MEIS2
																												SHMT1							AL031293.1		SLC4A5	ZKSCAN7-AS1
																												SHMT2							FOXG1-AS1		FAM169A	TNRC6C
																												SIRT3							CSDC2		DIPK2A	BCL2L14
																												SIRT4							LRRC9		AAMDC	RFX3
																												SIRT5							CD151		NEK1	SERPINI1
																												SLC16A1							MAP3K13		TMEM64	ANKRD33B
																												SLC16A11							TSC22D2		AL133480.1	AC243964.3
																												SLC16A7							WDR45		FBXO7	DIXDC1
																												SLC22A4							DPH6-DT		PEX1	SLIT2
																												SLC25A1							CEP164		FAM193A	L3MBTL4
																												SLC25A10							AC005237.1		KIAA0586	MXRA7
																												SLC25A11							RGN		TPT1-AS1	CASC4
																												SLC25A12							DYNC2LI1		GNE	EIF1B-AS1
																												SLC25A13							ACO1		BAALC-AS1	ARMC2
																												SLC25A14							HULC		PYGL	DNAAF4
																												SLC25A15							SAT2		CKMT2-AS1	PLD3
																												SLC25A16							FSIP1		CLOCK	NREP
																												SLC25A17							P3H2		AC002429.2	EXOC6B
																												SLC25A18							MEP1B		PBX1	PPP3CA
																												SLC25A19							LINC02250		TLN2	TSNARE1
																												SLC25A20							ESRRG		DHX32	LMTK2
																												SLC25A21							RIC8B		TIAM1	LMO4
																												SLC25A22							AL442071.2		EXTL3	CASC15
																												SLC25A23							USP40		CLTA	CDKL5
																												SLC25A24							HECTD2		ERMP1	ACACA
																												SLC25A25							AL391807.1		AC084198.2	ZNF273
																												SLC25A26							PAQR3		FAM193B	TTC3
																												SLC25A27							MAT2A		TMEM161B-AS1	C14orf132
																												SLC25A28							LEKR1		NRP2	FAM171A1
																												SLC25A29							SLC12A4		AC113414.1	DNAH14
																												SLC25A3							AL157829.1		ZNF146	TSHZ3
																												SLC25A30							IGSF10		FANCC	GTF2I
																												SLC25A31							AK3		AC104596.1	AZIN1-AS1
																												SLC25A32							PSAT1		GTF2IRD1	ARHGAP5
																												SLC25A33							PRKCA-AS1		MAT2A	MAST4
																												SLC25A34							SEPTIN11		AL391807.1	CACHD1
																												SLC25A35							ATP6AP1L		ZNF439	AC211433.1
																												SLC25A36							AGL		TTLL4	WDPCP
																												SLC25A37							RAD9A		SYNM	NMNAT3
																												SLC25A38							BDNF-AS		NBPF1	CC2D2A
																												SLC25A39							ZNF518A		AC092839.1	ZBTB7C
																												SLC25A4							AC077690.1		ZNF37A	LRRC6
																												SLC25A40							AC007344.1		ULK2	PTPRF
																												SLC25A41							MTURN		AC006115.2	MAP9
																												SLC25A42							PPP2R3A		ACSS2	LINC02250
																												SLC25A43							AC023421.2		TTBK2	KIF13A
																												SLC25A44							GAS8		PRH1	POT1-AS1
																												SLC25A45							GPD2		UTP20	HDX
																												SLC25A46							FAM169A		WDR59	CRB1
																												SLC25A47							ATN1		NAGLU	RAD9A
																												SLC25A48							ANO6		GPT2	AL354740.1
																												SLC25A5							TOB2		SREBF1	PNPLA7
																												SLC25A51							AC010618.3		ZBED5	MTSS2
																												SLC25A53							KDM3A		AVEN	KIAA0408
																												SLC25A6							ZC2HC1A		CCDC82	ZNF91
																												SLC30A6							PTCD1		PRELID2	ABHD2
																												SLC30A9							DMWD		LANCL2	CMTM4
																												SLC37A4							TLN2		TAPT1-AS1	AC233296.1
																												SLIRP							CCDC30		AC006001.2	LHPP
																												SLMO1							AL139815.1		SLC25A27	WDR19
																												SLMO2							AL365295.1		LINC00882	LRRC8B
																												SMDT1							PKIA		ZNF577	EFCAB2
																												SNAP29							ARHGAP39		FOXJ3	MRPL33
																												SND1							FAM66C		CNPY2	SEMA4B
																												SOD1							ZKSCAN7-AS1		KIAA0408	TMEM241
																												SOD2							CTXND1		CSRP1	ZRANB2-AS2
																												SPATA19							AC130650.1		HCFC2	XKR6
																												SPATA20							SOCS3		AC023389.1	DZIP3
																												SPG7							SPATA17		CARS	AC092574.2
																												SPR							MAP4K4		RNF157	FOCAD
																												SPRYD4							TNKS1BP1		SSBP3	LINC02798
																												SPTLC2							AL590999.1		ZFYVE1	CCPG1
																												SQRDL							AL050309.1		IFT88	MIR4300HG
																												SSBP1							ATP13A3		MAPKBP1	NR6A1
																												STAR							AL133415.1		RPGR	MAN1C1
																												STARD7							TRAF3IP2-AS1		FSD1L	MACROD1
																												STOM							KLKB1		FAM126A	CDH20
																												STOML1							RALGDS		GINM1	SLC25A12
																												STOML2							ACADVL		SOGA1	LIPE-AS1
																												STX17							PXDN		C15orf41	EFNA5
																												SUCLA2							TPCN1		MTX2	AC011346.1
																												SUCLG1							MALAT1		C16orf70	MROH1
																												SUCLG2							CSRNP1		COPG2	CNTNAP3B
																												SUGCT							SERGEF		GDPD1	PDZRN3
																												SUOX							LRRC49		PRKAR2A	NPHP4
																												SUPV3L1							B4GALT5		AC127035.1	REV3L
																												SURF1							STPG2		EPM2A	SACS
																												SYNJ2BP							CELF2-AS2		ARRB1	ZNF608
																												TACO1							LINC00174		KLHL3	IDS
																												TAMM41							CCDC9B		KIAA1328	RBKS
																												TARS							PPM1K		SH3YL1	AKT3
																												TARS2							FABP5		ZNF483	ZNF462
																												TBRG4							L3HYPDH		PAPSS1	AC011603.2
																												TCAIM							RIPK2		AP3B2	BCL9
																												TCHP							MIDN		TECR	PIK3R3
																												TCIRG1							ATP10B		RGS17	ADARB1
																												TDRKH							AVIL		SLC16A1-AS1	INTU
																												TEFM							FRS2		UBAP1L	KIAA1211
																												TFAM							SPRED3		NOMO1	STS
																												TFB1M							EFCAB2		NKTR	CYP51A1
																												TFB2M							GLIPR1L1		ZDHHC2	HIP1R
																												THEM4							GRIA1		BCAR1	IQCK
																												THG1L							GLRX		FLCN	LINC02614
																												THNSL1							RIC3		DCTN1	SEMA5A
																												TIMM10							TFE3		ABCC5	KIAA0930
																												TIMM10B							KCNE4		EPB41L4A	NMD3
																												TIMM13							MIRLET7BHG		PTPDC1	DPY19L3
																												TIMM17A							UPP2		PWWP2A	LINC00271
																												TIMM17B							RPS6KA2		PWWP3A	AC098829.1
																												TIMM21							TOM1L2		LINC02256	AP001442.1
																												TIMM22							HEATR5A		IL3RA	NIPAL2
																												TIMM23							MKRN3		ZNF621	TMTC1
																												TIMM44							CDK2AP1		AC008269.1	AHDC1
																												TIMM50							SESN3		ROR1	UBA6-AS1
																												TIMM8A							AZIN1-AS1		SLC35E4	AL139815.1
																												TIMM8B							TXNRD1		MIPEP	MTURN
																												TIMM9							AC012291.3		EXOSC10	PPP2CB
																												TIMMDC1							ASTN2-AS1		ZKSCAN7-AS1	AC023480.1
																												TK2							GADD45B		ZRANB3	KCNQ1OT1
																												TKT							CNTNAP1		GIT1	BCAS1
																												TMBIM4							BHLHE40		POMGNT1	PREX2
																												TMEM11							ANO5		CMTM4	AGBL3
																												TMEM126A							UPRT		HYDIN	MICALL2
																												TMEM126B							EXOC6B		CATSPERE	AC007389.1
																												TMEM143							EHHADH		KIF3A	ZCWPW2
																												TMEM14C							MAP4		AL157938.2	AHR
																												TMEM177							CLCF1		GTF2IRD2	DCAKD
																												TMEM186							AP000462.1		AC012085.2	TUBA1A
																												TMEM205							SLC35G2		UBXN2A	TNIK
																												TMEM65							GBP1		MGA	R3HDM1
																												TMEM70							GRK4		RANBP17	HS6ST1
																												TMLHE							ADAMTS9		DENND11	WLS
																												TOMM20							EPM2A		SLC35E3	YWHAH
																												TOMM22							KLF7		HABP4	FAM184B
																												TOMM34							TMEM72-AS1		AC010618.3	MFSD4B
																												TOMM40							GORASP1		ZSCAN30	EYS
																												TOMM40L							TUBB2A		METTL25	MATN2
																												TOMM5							SLC24A4		NIM1K	TMEM72-AS1
																												TOMM6							TRDMT1		MID1	RAPGEF2
																												TOMM7							TDRP		URM1	STXBP6
																												TOMM70A							NPTN		CAMK2D	SYNE1
																												TOP1MT							STK3		EMC10	SH3PXD2A
																												TOP3A							ENKUR		LINC00624	FADS1
																												TPI1							ZRANB2-AS2		CAPS2	RANBP17
																												TRAP1							AC068587.4		AF117829.1	PAPPA
																												TRIAP1							AL591686.2		ABCD4	MICAL2
																												TRIT1							AP000787.1		CC2D2A	FADS2
																												TRMT1							RNF180		USP14	VCAN
																												TRMT10C							UNC5B		AGBL3	LGR4
																												TRMT11							LRRIQ1		AIG1	DNMT3A
																												TRMT2B							ITGA3		NR6A1	ADAMTS9-AS2
																												TRMT61B							PFDN1		OGFOD1	YWHAG
																												TRMU							SEMA6A		PYGB	TNC
																												TRNT1							NEIL1		SPATA7	ANKRD36
																												TRUB2							DNAAF4		PPP2R1B	MDH1
																												TSFM							AC002451.1		DCUN1D4	MTHFD2L
																												TSPO							EFNB2		C2orf88	LIFR
																												TST							LINC00894		TRIM62	AL359232.1
																												TSTD1							SCRG1		ABCA3	ATP2B1
																												TSTD3							FEM1C		ATP1A1-AS1	AC007364.1
																												TTC19							MEIS1		SLIT2	WASF3
																												TUBB3							FBXL13		HLCS	AC021231.1
																												TUFM							MAP3K5		FKTN	LINC01006
																												TXN2							CNKSR3		LHPP	FAM106A
																												TXNDC12							ZSWIM5		PGAP1	AP001021.3
																												TXNRD1							C20orf194		PAAF1	ERC1
																												TXNRD2							ATP9A		ZC2HC1A	UBR3
																												TYSND1							PLXNB2		ZFHX2	RCAN1
																												UCP1							AL117335.1		EIF1B-AS1	HRH1
																												UCP2							RAB6B		PAPOLG	KIAA1958
																												UCP3							PER1		SIAH1	AEBP2
																												UNG							STK32A		SYCP2	CFAP54
																												UQCC1							TTTY14		PTDSS2	LINC00174
																												UQCC2							ASB3		FAM66C	STXBP5
																												UQCR10							AL645568.1		SCRN1	AL078459.1
																												UQCR11							TUBA1A		TSGA10	ARHGEF26
																												UQCRB							ALMS1		BDNF-AS	DPY19L1
																												UQCRC1							NEB		TWSG1	PTPN21
																												UQCRC2							WASF3-AS1		NME9	FIGN
																												UQCRFS1							TTC21A		SLC25A29	RAPGEF5
																												UQCRH							AC026894.1		FAM219A	SEC14L2
																												UQCRQ							CPSF4		GRK4	AC104596.1
																												USMG5							ZSWIM6		LRIG2-DT	UBE3A
																												VARS2							REPS1		AC079447.1	FSIP2-AS1
																												VDAC1							FSTL3		TTC28-AS1	RNLS
																												VDAC2							RUBCNL		GK5	FSIP2
																												VDAC3							MT2A		BCL6	HIVEP3
																												VWA8							SERPINE2		GBP2	STK33
																												WARS2							PKNOX2			DTNB
																												WBSCR16							NRP1			LINC00960
																												WDR81							CYP2J2			SULF2
																												XPNPEP3							JPX			COL16A1
																												XRCC6BP1							TUBB3			SUGCT
																												YARS2							PPM1K-DT			GREB1L
																												YBEY							FAM182A			AC125613.1
																												YME1L1							RABGEF1			PLCE1
																												ZADH2							LRP4-AS1			HTRA1
																																			CC2D2B			DPF3
																																			JUNB			PRDM5
																																			AZIN1			ADGRA3
																																			TP53BP1			PRKCA
																																			ZFHX2			LDLRAD3
																																			TLCD4			AL139317.5
																																			TMEM150C			EGR1
																																			MPZL1			PRELID2
																																			METTL15			CRLF3
																																			SIK2			XYLT1
																																			PTPRG-AS1			ZNF536
																																			GCLM			PI4KA
																																			ST7-AS2			JUN
																																			CEP70			MKLN1
																																			RHOC			PDE1A
																																			KCTD15			CDH19
																																			PKD1			SMYD3
																																			GJA9			SIPA1L1
																																			SLC24A1			CNOT2
																																			ZBBX			PRNP
																																			PPIL6			FTX
																																			SLC25A27			LIMA1
																																			GALNT16			2023-12-01
																																			ERI3			SPATA6
																																			PWWP3A			SAMD4A
																																			LYRM2			ATP10B
																																			CHDH			ZFHX4
																																			ALG1L9P			UST
																																			LINC01278			SLC6A1
																																			CYP46A1			LINC00472
																																			AC046158.1			PTN
																																			VWCE			CECR2
																																			IL1RAP			CALM1
																																			TMBIM1			TANC1
																																			SPAG9			ARHGAP31
																																			GALNT10			PEBP1
																																			QTRT1
																																			PRKAA2
																																			FBXL2
																																			TEX9
																																			UBA6-AS1
																																			LGI4
																																			C5orf64
																																			CSF1
																																			AL450384.2
																																			TAFA5
																																			RBMS3-AS3
																																			CLIP2
																																			DHX32
																																			HSD17B12
																																			TMEM67
																																			OLFM2
																																			AC005225.2
																																			ZDHHC2
																																			SHOC1
																																			MYCBP
																																			STK40
																																			ARHGEF40
																																			ITGA9-AS1
																																			UBE2H
																																			ETFDH
																																			CNIH3
																																			TTLL4
																																			SUGCT
																																			ROCK2
																																			RDX
																																			LRGUK
																																			DHCR24
																																			TSBP1-AS1
																																			AC125613.1
																																			SLC25A26
																																			MAATS1
																																			TSPAN7
																																			TMEM163
																																			ACO2
																																			HK1
																																			AC007364.1
																																			REV3L
																																			AC104781.2
																																			MAPRE2
																																			DNAJC27-AS1
																																			AC026341.1
																																			LRIG2-DT
																																			CSPP1
																																			GAP43
																																			ZBTB20
																																			AL683813.1
																																			NT5C2
																																			AC008667.1
																																			SPACA6
																																			SHB
																																			RING1
																																			PKIG
																																			DAPK3
																																			GLUD1
																																			MMD2
																																			AC020611.2
																																			EOGT
																																			PDK3
																																			DAG1
																																			FAM71F2
																																			BCAN
																																			ARMH4
																																			TMEM184B
																																			LRRC4B
																																			PPARGC1A
																																			NLGN4Y
																																			ECI2
																																			LINC01088
																																			PER3
																																			PRICKLE2-AS3
																																			STRIP2
																																			AC025442.2
																																			SNX21
																																			SRF
																																			ACSL3
																																			MYO9A
																																			COL28A1
																																			AC092802.1
																																			SATB2
																																			CTNS
																																			C14orf132
																																			SHC4
																																			MORN4
																																			GATM
																																			SLC16A1-AS1
																																			AMZ1
																																			RUBCN
																																			FLNA
																																			2023-03-02
																																			MIR22HG
																																			AC012636.1
																																			ECE2
																																			AC104123.1
																																			MAP3K14
																																			HIP1R
																																			IFITM3
																																			PSMG4
																																			IFI44L
																																			PLA2G6
																																			SNHG31
																																			DNAH14
																																			BBS5
																																			FBXO16
																																			SCG3
																																			PRSS51
																																			RRAS2
																																			MYO5C
																																			NLGN2
																																			AL627171.2
																																			NDRG2
																																			OGFOD1
																																			TET1
																																			GPR135
																																			GPR39
																																			NUMB
																																			HMBOX1
																																			TMEM161B-AS1
																																			SOGA3
																																			EPB41L5
																																			CBR4
																																			AOPEP
																																			DBI
																																			DCBLD2
																																			BAZ2B
																																			PEBP1
																																			IQCE
																																			GPC1
																																			RADIL
																																			DTX1
																																			MAGI2-AS3
																																			NFAT5
																																			JAKMIP2-AS1
																																			FOSB
																																			AC090115.1
																																			ICAM1
																																			HEG1
																																			FAM168A
																																			MYO1E
																																			FREM1
																																			MIR9-3HG
																																			CFAP221
																																			CHST10
																																			EYA1
																																			TPM1
																																			CD276
																																			FLG-AS1
																																			VAV2
																																			AC106845.1
																																			EEF2K
																																			GPLD1
																																			PHLPP2
																																			TAGLN
																																			DDX58
																																			IDI2-AS1
																																			EPB41L1
																																			RCAN1
																																			MALRD1
																																			UAP1
																																			IMMP2L
																																			UBR5
																																			AC083855.2
																																			SHC2
																																			IER2
																																			LINC02615
																																			CLEC16A
																																			THBS1
																																			RAPGEF3
																																			LRRN3
																																			CPEB1
																																			AP001528.1
																																			CCDC136
																																			PYGO1
																																			MEF2C-AS1
																																			CADM4
																																			FOSL2
																																			FAM27C
																																			SQSTM1
																																			C8orf34
																																			AP001266.2
																																			ZFYVE21
																																			HIF3A
																																			MLF1
																																			SMC5
																																			SYNE1
																																			NUMBL
																																			FAM131A
																																			ADD3
																																			GRIP1
																																			AC092567.1
																																			EEA1
																																			AC098829.1
																																			CCND2-AS1
																																			TEX2
																																			NDEL1
																																			SLCO3A1
																																			ERBIN
																																			WWOX
																																			S100A10
																																			TNNI3K
																																			TMEM205
																																			NXN
																																			MAFF
																																			AC006148.1
																																			MFSD4B
																																			ZDHHC15
																																			SYCP2
																																			MINDY4
																																			CDH10
																																			GALNT17
																																			CMTM4
																																			NNMT
																																			PPP4R4
																																			SNX7
																																			SNX32
																																			CD2AP
																																			MID1
																																			AL807742.1
																																			NEXN
																																			TRPS1
																																			NMNAT3
																																			PMEPA1
																																			PAPPA2
																																			POT1-AS1
																																			LINC01301
																																			SEC14L1
																																			NR4A1
																																			HFM1
																																			FIRRE
																																			DNAJB1
																																			S100A6
																																			ITGB1
																																			AC069437.1
																																			PEA15
																																			PLK3
																																			KIAA0408
																																			S100B
																																			NRP2
																																			NUP210L
																																			ACTN2
																																			AC020916.1
																																			WNK3
																																			ADORA1
																																			APOL2
																																			CD63
																																			ANKRD52
																																			MSMO1
																																			LPP
																																			CALN1
																																			IDI1
																																			TENT5A
																																			NME5
																																			ZBTB21
																																			AL136298.1
																																			HMGCR
																																			ELOVL5
																																			SLC39A11
																																			SCN1A
																																			FAM120C
																																			PDLIM7
																																			RAB11A
																																			STX12
																																			CYP51A1
																																			NES
																																			GBP2
																																			AC011511.2
																																			SLC16A1
																																			IFIT3
																																			FBXO32
																																			TMEM241
																																			HMGCS1
																																			SLC19A2
																																			SPARC
																																			GUCY1A1
																																			A2M
																																			ITGA5
																																			ELL2
																																			SPP1
																																			SPSB1
																																			RIMS1
																																			HOMER1
																																			PDE1C
[truncated: 20 more columns]

## Sheet: Supplementary table 6-1
	Supplementary table 6-1: Summarized scores as determined in the study
			ID	MicrogliaScore_mRNA	MethylScore	sdv	Immune Cell Content (LUMP)
			Pat 1	-0.27525	0.646818	0.0826854	0.166782
			Pat 10	2.958	0.459796	0.0568615	0.307204
			Pat 11	1.615	0.3389	0.117775	0.358285
			Pat 12	4.00325	0.34258	0.0596908	0.587714
			Pat 13		0.558216	0.150771	0.394466
			Pat 2	1.051	0.657357	0.0973831	0.227274
			Pat 22	1.09625	0.389398	0.175494	0.340405
			Pat 23-O	2.00725	0.353394	0.0965187	0.236395
			Pat 23-P	-0.283	0.397405	0.0909397	0.314387
			Pat 24-F		0.333048	0.0727038	0.5256
			Pat 24-I		0.411769	0.180273	0.57497
			Pat 25		0.472536	0.119
			Pat 26		0.502903	0.190347	0.20884
			Pat 27		0.478114	0.138038	0.330053
			Pat 3	2.44275	0.299254	0.0456984	0.303822
			Pat 4	4.88625	0.25681	0.0456659	0.447233
			Pat 5	2.46875	0.217997	0.0762732	0.283881
			Pat 6	3.545	0.272192	0.123204	0.397218
			Pat 7	2.079	0.470263	0.193379	0.219369
			Pat 8/M3		0.334248	0.104317	0.588709
			Pat 9	1.263	0.445209	0.199682	0.490662

## Sheet: Supplementary table 6-2
	Supplementary table 6-2: Determined, methylome profiling-based microglia scores ("MethylScore calculation")
	cg24400465	cg05128364	cg21704050	cg03498995
ID	APBB1IP	SYK	P2RY12	HCK	MethylScore	sdv	MethScore
Pat 5	0.162147	0.203227	0.159926	0.346686	0.217997	0.0762732	low
Pat 4	0.308782	0.290035	0.192914	0.235507	0.25681	0.0456659	low
Pat 6	0.27306	0.136693	0.210484	0.468529	0.272192	0.123204	low
Pat 3	0.300873	0.299681	0.36284	0.233624	0.299254	0.0456984	low
Pat 24-F	0.426357	0.283922	0.378215	0.243697	0.333048	0.0727038	low
Pat 8/M3	0.34201	0.487766	0.312322	0.194893	0.334248	0.104317	low
Pat 11	0.215859	0.332693	0.277126	0.529923	0.3389	0.117775	low
Pat 12	0.350276	0.245532	0.407035	0.367479	0.34258	0.0596908	low
Pat 23-O	0.292135	0.520095	0.291667	0.309677	0.353394	0.0965187	low
Pat 22	0.292446	0.463131	0.168534	0.63348	0.389398	0.175494	low
Pat 23-P	0.335019	0.553539	0.336111	0.364952	0.397405	0.0909397	low
Pat 24-I	0.227381	0.639799	0.243243	0.536653	0.411769	0.180273	high
Pat 9	0.251578	0.588721	0.246497	0.694039	0.445209	0.199682	high
Pat 10	0.517618	0.397421	0.408741	0.515404	0.459796	0.0568615	high
Pat 7	0.209882	0.595129	0.369186	0.706855	0.470263	0.193379	high
Pat 25	0.339367	0.662271	0.418655	0.469852	0.472536	0.119	high
Pat 27	0.363239	0.372385	0.471136	0.705696	0.478114	0.138038	high
Pat 26	0.31716	0.767814	0.327092	0.599546	0.502903	0.190347	high
Pat 13	0.610977	0.651794	0.299737	0.670355	0.558216	0.150771	high
Pat 1	0.576364	0.678048	0.564846	0.768016	0.646818	0.0826854	high
Pat 2	0.628647	0.748167	0.510258	0.742357	0.657357	0.0973831	high

## Sheet: Supplementary table 6-3
	Supplementary table 6-3: Transcriptome profiling-based microglia score "(RNAScore")
Iba1 level	Genes	P2RY12	APBB1IP	HCK	SYK	MicrogliaScore_mRNA
low	Cereb.	1.826	0.142	0.442	0.093	0.62575
low	Cortex	3.14	1.109	1.236	1.091	1.644
low	Pat_1	-1.425	-1.109	0.608	0.825	-0.27525
high	Pat_10	1.1	3.025	3.655	4.052	2.958
high	Pat_11	1.786	0.793	2.429	1.452	1.615
high	Pat_12	4.346	3.97	3.884	3.813	4.00325
low	Pat_2	1.156	-0.954	0.772	3.23	1.051
low	Pat_22	-1.284	1.199	2.082	2.388	1.09625
high	Pat_23.O	1.77	1.86	2.552	1.847	2.00725
low	Pat_23.P	-2.905	0.573	0.785	0.415	-0.283
high	Pat_3	0.368	1.719	3.779	3.905	2.44275
high	Pat_4	5.212	4.165	5.306	4.862	4.88625
high	Pat_5	1.432	1.942	3.514	2.987	2.46875
high	Pat_6	3.197	2.663	4.375	3.945	3.545
high	Pat_7	1.525	1.525	2.734	2.532	2.079
high	Pat_9	-0.17	1.399	2.59	1.233	1.263
low	Pat8_BMC1.M1	-3.451	-3.965	-0.887	-0.879	-2.2955
low	Pat8_BMC1.M4	-4.103	-8.009	-7.644	2.018	-4.4345
low	Pat8_M1	-0.522	0.171	0.73	0.749	0.282
low	Pat8_M4	-0.126	1.26	2.38	2.021	1.38375
low	Pons	3.445	1.96	2.079	2.02	2.376

## Sheet: Supplementary table 6-4
	Supplementary table 6-4: Transcriptome profiling-based Proliferation index
	Genes	PCNA	MKI67	CCNB1	CCNB2	Proliferation index	sdv
	Pat8_BMC1-M1	7.485	2.856	5.582	4.29	5.05325	1.96668
	Pat_23-O	6.42	4.383	5.382	3.797	4.9955	1.15328
	Pat_4	6.903	3.668	5.211	3.71	4.873	1.53185
	Pat_6	7.963	2.979	4.893	3.428	4.81575	2.25171
	Pat_11	7.563	2.853	4.987	3.853	4.814	2.02945
	Pat8_BMC1-M4	6.255	3.434	5.184	4.326	4.79975	1.20487
	Pat_9	7.181	3.518	4.156	4.006	4.71525	1.66625
	Pat_23-P	5.436	4.399	4.777	3.21	4.4555	0.934381
	Pat8_M4	5.054	3.57	4.149	3.296	4.01725	0.777269
	Pat_5	6.85	2.474	3.723	2.781	3.957	2.00054
	Pat_3	6.53	1.929	4.024	3.318	3.95025	1.9275
	Pat_12	6.693	2.19	4.003	2.869	3.93875	1.98263
	Pat_2	6.58	1.403	4.427	2.548	3.7395	2.26716
	Pat_7	6.129	2.371	4.264	2.11	3.7185	1.87182
	Pat8_M1	6.266	1.499	3.9	2.68	3.58625	2.03776
	Pat_1	5.325	0.939	3.093	1.585	2.7355	1.94802
	Pat_10	4.842	0.106	2.361	0.296	1.90125	2.21052
	Pat_22	4.647	0.377	1.539	0.332	1.72375	2.02733
	Pons	3.825	-2.609	0.895	0.765	-0.316333	1.98657
	Cereb.	3.446	-5.631	2.051	-1.19	-0.331	4.03185
	Cortex	3.879	-3.884	1.012	-0.013	-0.961667	2.58219

[truncated: 1 more sheets: Supplementary table 7]
